# Supplementary material for: The Systematic Functional Analysis of Plasmodium Protein Kinases Identifies Essential Regulators of Mosquito Transmission
Source: PubMed Central journal article supplement (PMC2977076; doi:10.1016/j.chom.2010.09.006), 2010-10-21
Supplement: mmc1.pdf [file mmc1.pdf]

## Supplemental Information

Cell Host & Microbe, Volume 8

### The Systematic Functional Analysis of *Plasmodium* Protein Kinases Identifies Essential Regulators of Mosquito Transmission

Rita Tewari, Ursula Straschil, Alex Bateman, Ulrike Böhme, Inna Cherevach, Peng Gong, Arnab Pain, and Oliver Billker

#### SUPPLEMENTAL EXPERIMENTAL PROCEDURES

##### Generation of Gene Knockout Parasites

Oligonucleotides used to amplify targeting sequences from *P. berghei* genomic DNA are described in “Table oligonucleotides”. Depending on construct design, restriction digests with KpnI/SacII or ApaI/XbaI were used to release the linear targeting vector from the cloning plasmid. Electroporated parasites were mixed immediately with 100 µl of reticulocyte-rich blood from a phenylhydrazine treated, naive mouse and incubated at 37°C for 15 minutes. Re-invaded parasites were injected intraperitoneally into naive mice. From day 1 post infection pyrimethamine was applied in the drinking water for four days. Mice were monitored for 15 days to allow any slow growing mutants to reach patency. Drug selection was repeated after passage to a second mouse, and resistant parasites were used for cloning by limiting dilution, and genotyping.

##### Genotype Analysis of Mutants.

Chromosomes of wild type and knockout parasites were separated by pulsed field gel electrophoresis (PFGE) on an LKB 2015 Pulsaphor system or CHEF DR III using a linear ramp of 60–500 s for 72 hr at 4V/cm. Gels were blotted and hybridized with a probe recognizing both the resistance cassette in the targeting vector and, more weakly, the 3'UTR of the *P. berghei dhfr/ts* locus on chromosome 7. Two diagnostic PCR reactions were used as illustrated in Fig. 2A. In one reaction primers 1 and 2 were used to determine correct integration of the selectable marker at the target locus. Primers 3 and 4 (Fig. 2A) verified deletion of the target gene. Sequences for the locus-specific primers (P1, P3, and P4) are given in Table S4. The generic primer P2 was either ol248 (5'-GATGTGTTATGTGATTAATTCATACAC-3') or ol539 (5'-CAATGATTCATAAATAGTTGGACTTG-3'), depending on whether the 5' or 3' end of the *tgdhfr/ts* cassette was used to verify integration. Having confirmed integration on one end by diagnostic PCR, we usually used Southern blot analysis to probe integration on the opposite end of the construct. Genomic DNA from wild type and mutant parasites was digested with diagnostic restriction enzymes cutting once within the knockout cassette, as illustrated in Fig. 2A. The fragments were separated on a 0.8% agarose gel, blotted onto a nylon membrane,

and probed with a PCR fragment homologous to the *P. berghei* genomic DNA just outside of the targeted region.

### Phenotype Analysis

Infections for phenotype screens were initiated by the intraperitoneal injection of infected blood containing  $5 \times 10^6$  parasites into mice that had been pretreated with 0.2 ml of 6 mg/ml phenylhydrazine in PBS intraperitoneally to induce reticulocytosis. Asexual stages and gametocyte production were monitored on Giemsa-stained blood films.

Exflagellation was examined on days 3-4 post infection. 5  $\mu$ l of gametocyte-infected blood were obtained from the tail with a heparinized pipette tip and mixed immediately with 40  $\mu$ l of ookinete culture medium (RPMI1640 containing 25 mM HEPES, 25% fetal bovine serum, 10 mM sodium bicarbonate, 50  $\mu$ M xanthurenic acid at pH 7.6). The mixture was placed under a Vaseline-coated cover slip and 10-20 min later exflagellation centers were counted by phase contrast microscopy in 12-15 fields of view using a 63x objective and 10x ocular lens.

Ookinete formation was assessed on the same day. 10  $\mu$ l of infected tail blood were obtained as above, mixed immediately with 40  $\mu$ l ookinete culture medium, and incubated for 1 h at 19°C to allow completion of gametogenesis and fertilisation. Each culture was then diluted with 0.4 ml of ookinete medium and transferred to a 24-well plate, which was incubated at 20°C for a further 21–24 h to allow ookinete differentiation. Cultures were pelleted for 2 min at 5000 rpm and then incubating for 5min on ice with 50  $\mu$ l of ookinete medium containing the DNA dye Hoechst 33342 to a final concentration of 5  $\mu$ g/ml and a Cy3-conjugated mouse monoclonal antibody 13.1, which recognizes the P28 protein on the surface of ookinetes and any undifferentiated macrogametes or zygotes. Labeled cultures were placed on a microscope slide under a Vaseline-rimmed cover slip and P28-positive cells counted with a Leica DMR fluorescence microscope. Ookinete conversion was expressed as the percentage of P28 positive parasites that had differentiated into ookinetes. *In vitro* cross fertilisation experiments with the *srpk* mutant were carried out by mixing 5  $\mu$ l volumes of tail blood containing equal number of either *srpk*, *cdpk4* or *nek-4* mutant gametocytes (Liu et al., 2008). Ookinete conversion was then determined as above.

For mosquito transmission experiments 50-100 *Anopheles stephensi* SD500 mosquito were allowed to feed for 20-30 min on anaesthetized mice that had been infected with wild type or mutant parasites 4-5 days earlier, had reached an asexual parasitaemia ~5-7% and were carrying comparable numbers of gametocytes as determined on Giemsa stained blood films. Unfed mosquitoes were removed the following day. On day 14 post feeding approximately 20 mosquitoes were dissected and oocysts on their midguts counted. DNA replication in the cysts was examined by staining with Hoechst 33342 for 10-15

minutes before guts were washed and mounted under Vaseline-rimmed cover slips. Images were recorded using a 63x oil immersion objective on a Leica DMR fluorescence microscope equipped with a Leica DC500 digital camera. On day 21 post feeding another 20 mosquitoes were dissected and their guts and salivary glands crushed separately in a loosely fitting homogenizer to release sporozoites, which were then quantified using a haemocytometer.

Due to day-to-day variations in transmission levels, all data were normalized to a matching number of wild type controls analyzed on the same day. Average total infection levels for wild type were as follows: 67.5 ± 7.0 % of female gametes transformed into ookinetes within 24 h *in vitro* (n = 25 cultures); 97.8 ± 55.4 wt oocysts were counted per infected mosquito midgut on day 14 p.i. (n = 43 experiments); 31,000 ± 7,400 sporozoites were obtained per mosquito midgut on day 21 p.i. (n = 34 experiments); 6,600 ± 2,800 sporozoites were recovered from salivary gland per mosquito on day 21 p.i. (n = 37 experiments).

All mutants with salivary gland infections were analysed for the infectivity of their sporozoites. 30-50 infected mosquitoes were allowed to feed for 20 min on 3 anesthetized naïve C57Bl/6 mice, which are highly susceptible to sporozoite challenge. Mice were monitored for blood stage infections from day 3 and until about day 15 post feeding.

### Supplemental References

Edgar, R.C. (2004). MUSCLE: a multiple sequence alignment method with reduced time and space complexity. *BMC Bioinformatics* 5, 113.

Felsenstein, J. (1985). Confidence limits on phylogenies: An approach using the bootstrap. *Evolution* 39, 783-791.

Goodstadt, L., and Ponting, C.P. (2001). CHROMA: consensus-based colouring of multiple alignments for publication. *Bioinformatics* 17, 845-846.

Liu, Y., Tewari, R., Ning, J., Blagborough, A.M., Garbom, S., Pei, J., Grishin, N.V., Steele, R.E., Sinden, R.E., Snell, W.J., *et al.* (2008). The conserved plant sterility gene HAP2 functions after attachment of fusogenic membranes in *Chlamydomonas* and *Plasmodium* gametes. *Genes Dev* 22, 1051-1068.

Saitou, N., and Nei, M. (1987). The neighbor-joining method: a new method for reconstructing phylogenetic trees. *Mol Biol Evol* 4, 406-425.

Tamura, K., Dudley, J., Nei, M., and Kumar, S. (2007). MEGA4: Molecular Evolutionary Genetics Analysis (MEGA) software version 4.0. *Mol Biol Evol* 24, 1596-1599.

Zuckerlandl, E., and Pauling, L. (1965). Evolutionary divergence and convergence in proteins. In *Evolving Genes and Proteins*, V. Bryson, and H.J. Vogel, eds. (New York, Academic Press), pp. 97-166.







Tewari et al., Figure S1 A (cont.)

|                      | IVa                                         | Vib<br>catalytic aspartate<br>HRDxxxN | VII<br>Mg2+ binding aspartate<br>D (FG) | VIII<br>conserved glutamate<br>APE | IX                                        |
|----------------------|---------------------------------------------|---------------------------------------|-----------------------------------------|------------------------------------|-------------------------------------------|
| PF1020c              | ---KIFKSRKKNKK---KLLFE---SKKLINL---         | Q-AG-IC-HLDFLDN---                    | S-KN-GD---M-RIC-D                       | AKCTP (9) --KKMDSLCL               | FQSCI-TTIGKYM---VYVPCWVDV (22) --EERKKYFF |
| PBANKA 141450        | ---RLKKQEKRR---ENNQ---ICLQIKN---            | E-HN-VA-HRDLKPNL---                   | NLDTPD-IN---V-EIC-D                     | LRSAKK---VEKSI                     | SIPYI---CSRW-YRABE                        |
| MAL8P1.203           | ---YMKISNNEKS---FLLYQ---CLKLIIRL---         | D-AG-LS-HLDFPENL---                   | S-DN-YE---L-RFC-D                       | LSKSTP (9) --KDMNRYL               | FESCE-PTIARGA---YMPBCWKI (22) --EKRRQYFF  |
| akt1                 | ---RERVFSRDRAR---FYGAE---YVSAVDYL---        | SEKN-VV-YRDLKLENL---                  | D-KD-GH---L-KIT-D                       | GLCKE---GIKDGAT                    | MKTFC---GTFPE-YLAPB                       |
| MAL13P1.278          | ---KKRRIPELAY---KYFCH---VWNGYYLN---         | Q-MG-IF-HRDLKPNL---                   | D-HK-DN---A-KIS-D                       | LSAM---ILGKKS                      | HSSIC---GTLV-YFSEB                        |
| PBANKA 041040 gsk3   | ---NNQFLPFLVK---LVSYQ---LCRAIGYL---         | S-KL-IC-HRDLKPNL---                   | D-PKT-HT---L-KIC-D                      | LSAKS---LISGQR                     | SVSYI---CSRW-YRABE                        |
| limk1                | ---MDSQYFWSQV---SFAKD---IASGMAYL---         | S-MN-LI-HRDLKPNL---                   | R-EN-KN---V-VVA-D                       | LLARL (12) SLKPKPRK                | RYTVV---GNPY-YRABE                        |
| PBANKA 112690 pk4    | ---GDKNTNHPLEF---DLFKQ---LKGKDDH---         | S-TC-FI-HRDLKPNL---                   | D-LDT-YI---L-KIG-D                      | LLVRF (5) RENDLNIND                | FKDNI (20) GTFPG-YRABE                    |
| zak                  | ---RSEEMDMDHIM---TWATD---VAKGMHYL---        | MEAPVKVI-HRDLKPNL---                  | A-AD-GV---L-KIC-D                       | MASRF---HNHTT                      | HMSLV---GTFPE-YRABE                       |
| PBANKA 144300 nek-1  | ---MFGKIEEHAIV---DITRQ---LHAAYCH---         | GP-NGERVL-HRDLKPNL---                 | ST-GI (16) P-AKIG-D                     | LSKN---IGIESM                      | AHSCV---GTFPE-YRABE                       |
| PBANKA 080800 crk-4  | ---DMPSLTEMQTK---VITIQ---MLQGNHFF---        | K-KF-LI-HRDLKPNL (10) NDS             | KE-WI---V-KIA-D                         | GLGVY---DHFLEKTE                   | KDCNI---ITLQ-YRABE                        |
| PBANKA 092640        | ---RSIGVSENIFF---NIILO---MVHAYATH---        | D-KD-VI-HRDLKPNL---                   | N-KD-GT---L-KIA-D                       | TSKD (116) RNYRKKT                 | FONYV---GTAN-YRABE                        |
| PBANKA 123020 crk-5  | ---NQAGLCLREAK---WLSFQ---LNGAYL---          | N-NK-VC-HRDLKPNL---                   | Q (4) NK-YL---L-KIG-D                   | LLCRE---LKNDDG                     | MTPVY---CTIY-YRABE                        |
| PBANKA 094200        | ---YKXKVENVCK---YILMQ---LQAVNYL---          | Y-HN-LI-HRDLKPNL (1) --               | N-KK-RN (9) --                          | YDTQF (24) IKTIQNSK                | TNNAF (10) GTIYG-YRABE                    |
| PF10_0380            | ---KETVVSVEEKK---KIMKE---CLKLIKLI---        | N-AG-LA-HLDSPEL---                    | S-NN-SE---F-RIC-D                       | LAKSAP (9) --KGDEKSP               | FQSYQ-PCIGKLT---CMPKWDI (22) --EERKKYFF   |
| PBANKA 100820 pkg    | ---KLGLLRSQAQ---FYLGS---LILAEYEL---         | E-RS-IV-YRDLKPNL---                   | D-KQ-GY---V-KIA-D                       | CAKK---IHRG                        | SYTLV---GTFPH-YRABE                       |
| PBANKA 130520        | ---NVLYLELSAQ---YFFRK---LIDGKYM---          | S-NK-LA-HRDLKPNL---                   | C-KK-VLNO (16) EL                       | ACCF---NDASNK                      | HYDIV---GTLG-YRABE                        |
| PF0750w              | ---DQAGNLKEAK---WLSFQ---LNGAYL---           | N-NK-VC-HRDLKPNL (10) QETS            | N-HK-YL---L-KIG-D                       | LLCRE---LKNDDG                     | MTPVY---CTIY-YRABE                        |
| PBANKA 061670 nek-4  | ---QNTPIKEKRII---IWLQ---LITAKPFL---         | S-NH-LI-HRDLKPNL---                   | D-SD-KR---V-RIC-D                       | LSKV---LENTLYE                     | ANTLI---GTFPE-YRABE                       |
| PF0420w cdpk3        | ---KKGCFVETFAF---FIMKQ---LPSVANYL---        | I-RN-IC-HRDLKPNL---                   | PE-SL---L-KIA-D                         | LSAY---FTHNYYE                     | MTKA---GTFPE-YRABE                        |
| insr_1-276           | ---GRPPTLQEMI---QMAAE---IADGMAYL---         | A-KK-FV-HRDLKPNL---                   | A-HD-FT---V-KIG-D                       | MTDR---IYEDYI                      | RKGGK---GLLPVR-YRABE                      |
| PBANKA 082690        | ---EKKVLSVDISL---KMCRO---LAAVNYL (4) NK     | KN-VI-HRDLKPNL---                     | D-SD-WM---L-HIC-D                       | LDSE---TEDGN                       | VNVS---GATWI-YRABE                        |
| PBANKA 061520 cdpk4  | ---SRKRFVVDAA---RIIQQ---VLSGYTME---         | K-NN-VI-HRDLKPNL---                   | E-TKN-KEDMI                             | LDSTH---FEYSKK                     | MKDKI---GTFPE-YRABE                       |
| PF10110c             | ---IYRDISENERK---KIIHE---WIKLSRI---         | D-TG-LS-HLDSPEL---                    | G-EN-HK---M-RIC-D                       | AKSTP (9) --KPNGLK                 | FQSC-PTVGPKP---YAPB (22) --EERKKYFF       |
| pf14_0423_1-361      | ---GFCRNEKLIW---ELIKQ---LILGASYL---         | D-MK-IM-HRDLKPNL---                   | Q-IT-DN---L-LIAKIG-D                    | LTTR---IGDQ                        | INPSA---GTFPH-YRABE                       |
| PBANKA 082710        | ---KNVAYNLNFRV---LTLME---IANMSYIL---        | KQTPNHEFYI-HRDLKPNL---                | KN-KK---L-LIT-D                         | NLSRK---IDAEYIL                    | MQQC---GTFK-HLABE                         |
| PBANKA 112270 tk15   | ---NKNVHKKQRL---EWAIQ---SNIHHE---           | S-NHPP-LI-HRDLKPNL---                 | N-NN-MD---L-VMC-D                       | KARF---KNSK                        | LNSNF---GTFPE-YRABE                       |
| PBANKA 091210 ck1    | ---CNRRFSLKTVL---MTADQ---MNRREYV---         | S-KN-FI-HRDLKPNL---                   | GR-GK-KV-TL---                          | LIT                                | HTI---GTFAR-YASIN                         |
| PF0525c gsk3         | ---NNQALPFLVK---LVSYQ---LQAVNYL---          | S-KF-IC-HRDLKPNL---                   | D-PRT-HT---                             | LSAKN---LLAGOR                     | SVSYI---CSRW-YRABE                        |
| PF0605w pk7          | ---YTCFPIQVIK---CIKIS---VNSFSYIL---         | NEKN-IC-HRDLKPNL---                   | D-KN-GR---V-KIS-D                       | SEYI---MVDKK                       | IKGSR---GTFPE-YRABE                       |
| PBANKA 101980 cdlk   | ---KNKCLLESESI---QIVRQ---VCTEYEL---         | S-NN-LI-HRDLKPNL---                   | K-NKN-TE (1) --                         | MAKT---VNCYD                       | LTEIC---GTFPH-YRABE                       |
| PF07_0072 cdpk4      | ---SRKRFVVDAA---RIIQQ---VLSGYTME---         | K-NN-VI-HRDLKPNL---                   | E-TKN-KEDMI                             | LDSTH---FEYSKK                     | MKDKI---GTFPE-YRABE                       |
| raf1                 | ---QETKQMFQLI---DIARQ---LQAGMDYL---         | A-KN-LI-HRDLKPNL---                   | H-EG-LT---                              | LATV---KSRWSGQ                     | YQPTF---GTFPE-YRABE                       |
| PF0485w              | ---RNKCFNEEAR---YLFHQ---LILGAYL---          | S-KK-VA-LRDLKPNL---                   | FEN-EKN-GE---                           | YVFIN                              | PLQALYFNKRNIVLE                           |
| PBANKA 113320 pk5    | ---CDGGLSHTAK---SFLQ---LNGAYCH---           | E-RR-VI-HRDLKPNL---                   | N-RE-GE---                              | LARA---HDSATPTIDA                  | PHHRV---GTFPH-YRABE                       |
| PF11_0239 cdpk6      | ---NSESFNTEYIK---NIMFQ---LILGAYL---         | S-NN-LA-HRDLKPNL---                   | K-EKG-DD (1) --                         | LAE                                | INKSEI---SKTAA---GTFPE-YRABE              |
| PF13_0206 crk-6      | ---KKHNLNKEIK---YIIFE---LILGAYL---          | S-NN-YI-HRDLKPNL---                   | T-SE-GE---                              | LMSVE---KSDH                       | MTPVY---GTFPE-YRABE                       |
| PBANKA 136210 tk13   | ---QNHLSRQVUV---KIFQQ---LAKGMYEL---         | S-NH-FI-HRDLKPNL---                   | D-EN-KN---A-FIS-D                       | LSSTY---FSLNDS                     | AVAYI---GTFPE-YRABE                       |
| MAL7P1.100 nek-4     | ---QNTPIKEKRII---IWLQ---LITAKPFL---         | S-NH-LI-HRDLKPNL---                   | D-SD-KR---V-RIC-D                       | LSKV---LENTLYE                     | ANTLI---GTFPE-YRABE                       |
| PF0045c              | ---RKPILKNRYAK---KKKIYD---SLNLIIRL---       | D-AG-LI-HLDFPENL---                   | S-EN-NE---                              | LAKSTP (9) --QETKGLCL              | FQSC-PTVGKSA---YMPBCWKI (22) --DERKKHYF   |
| PF01165w             | ---GCGNNLEKAK---KILHE---SKKLITL---          | E-TG-LS-HLDSPEL---                    | G-NN-CE---                              | LNSAP (11) NKRILYSS                | YQPCI---SKVP-LILPCWNI (22) --EERKSYFF     |
| PBANKA 146000 pkb    | ---KLTKEFTNIAR---FYISE---YIAGQYEL---        | K-LN-LI-HRDLKPNL---                   | D-KN-GH---L-RIT-D                       | LSKE---CISDNNS                     | AKPIC---GTFPE-YRABE                       |
| PBANKA 080220        | ---SNENISPEKIK---DIIFQ---LISGASAL---        | D-NF-LI-HRDLKPNL---                   | K-DK-NFEK---                            | DMSIY (113) NTLSDNNT               | YTKR (74) GTFPE-YRABE                     |
| PF14_0227 cdlk       | ---KNKCLMESESA---LIVRQ (10) ---LCCALQYEL--- | S-NN-FI-HRDLKPNL---                   | K-NKN-TK (1) --                         | MAKR---VNCYD                       | LTEIC---GTFPH-YRABE                       |
| PF03170w             | ---SDKMNHPLEF---DLFKQ---LKGKDDH---          | A-TC-FI-HRDLKPNL---                   | D-PDT-YT---                             | LLVRF (5) REKDFNID                 | FKDNI (20) GTFPG-YRABE                    |
| tgfbr1               | ---NRYTVTVEGMI---KLALS---TAGSAHL (4) GT     | QGKPAIARHLSKKNL---                    | K-KN-GT---                              | C-TIA                              | D                                         |
| PBANKA 101330        | ---RADILEEVHKK---YIIFQ---LILGAYL---         | S-G-LI-HRDLKPNL---                    | N-SE-CH---                              | LARS---ISTVHNKIPV                  | LIDYV---ATRW-YRABE                        |
| PF13_0258 tk13       | ---YAKSLTRPKLV---KIFQQ---VAGQMYIL---        | TN-OCFHRDLKPNL---                     | D-EN-QN---A-VIS-D                       | LNSTN---FSSNDSP                    | AIVYI---GNIF-YRABE                        |
| PBANKA 146050 gsk3   | ---NKKDIKEFHI---KILKQ---LISGNYL---          | T-QEIP-LI-HRDLKPNL---                 | D-KN-NV---Y-KIC-D                       | CSHTV (6) NDLKKNLNL                | LKYEI-ERDTIYI---YRABE                     |
| PBANKA 113310        | ---KKRRIPELAY---KYFCH---VWNGYYLN---         | Q-MG-IF-HRDLKPNL---                   | D-HK-DN---A-KIS-D                       | LSAM---ILGKKS                      | HSSIC---GTLV-YFSEB                        |
| PBANKA 122880 tk16   | ---GENFLYELRL---RMCYQ---LEAVNMYL---         | EDKK-LV-HRDLKPNL---                   | D-DE-YN---                              | KTKM---LSDNTHVI                    | LEDNG---GTFPE-YRABE                       |
| MAL7P1.175           | ---RKKMFSIGRKK-KKKKLLY---CNLIRKLI---        | N-AG-LS-HLDFPENL---                   | S-DK-HE---                              | L-KATP (9) --NNINGHS               | FESCA-PCVGKIR---YMPBCWLI (21) --EERKPYFF  |
| PBANKA 092550 cdpk6  | ---KQVIFSEYTIK---NIMFQ---LILGAYL---         | S-NN-LA-HRDLKPNL---                   | K-TDG-YD (1) --                         | LAE                                | INKSEI---SKTAA---GTFPE-YRABE              |
| PBANKA 131800 kin    | ---KNSINENIAK---RIIYQ---LILGAYL---          | K-LN-VI-HRDLKPNL---                   | D-NN-NN---                              | LDSTI---YSKNNF                     | LQSC---GTFPE-YRABE                        |
| PBANKA 040110 SRPK   | ---DYKGIPIINLVR---KIATH---VILGQYEL---       | DVCK-LI-HRDLKPNL (190) NT             | NK-DN (16) DM                           | K(28) SINEN (141) YVDKDNK          | FPIY (82) ESRY (7) YRABE                  |
| PBANKA 071730 crk-3  | ---NMNLFITGEIK---NIMLQ---LQAGYEL---         | K-NN-VI-HRDLKPNL---                   | D-AN-GI---                              | LALRF---HDSFASN                    | MNRVR---ITLW-YRABE                        |
| PF0755c crk-4        | ---EMPSLTIQTK---VITIQ---MLQGNHFF---         | K-KF-LI-HRDLKPNL (10) NDP             | KE-WI---V-KIA-D                         | GLGVY---DHFLEKTE                   | KDCNI---ITLQ-YRABE                        |
| PF01130c             | ---MGTEWFEVVK---KILFK---SKKLIRL---          | D-VG-LI-HLDFPENL---                   | T-KN-FD---                              | LKSAP (9) --KEMNML                 | FQSC-PTVGKSA---YMPBCWLI (22) --EERKPYFF   |
| PF10115c             | ---KTYKFKNDKK---KIMLE---CLKLIKLI---         | Q-VG-IC-HLDFPENL---                   | S-KN-GD---M-RIC-D                       | SKSTP (9) --KMKMLCL                | FQSCI-PSVGKTR---YMPBCWLI (22) --EERKPYFF  |
| PF0520w cdpk2        | ---ENGSLTEKNA---TIMKQ---LPSVANYL---         | S-LN-LV-HRDLKPNL---                   | QSEN-KD-SL---                           | LSKN---LGTGEF                      | TITKA---GTFPE-YRABE                       |
| PF11_0488            | ---YHGPINELLAL---CNIRQ---LILGLYMK---        | N-LPTGKVRHCDLKPNL---                  | KD-GI---                                | LAKL---ILPDTHQ                     | YVNGG---GTFPE-YRABE                       |
| map3k3               | ---AYGALTESVTR---KYTRQ---ILEGMSYL---        | S-NN-MIVHRDLKPNL---                   | D-SA-GN---V-KIG-D                       | MASKR---LQICMSGTG                  | MRSVT---GTFPE-YRABE                       |
| PBANKA 124070 nek-2  | ---MKTIIIPENKIK---RWLQ---LITAKPFL---        | E-KK-LI-HRDLKPNL---                   | D-EN-EK---                              | LAKL---LEKTDQ                      | TNTLC---GTFPE-YRABE                       |
| PBANKA 040740        | ---KHDFTKEQVA---LVVYQ---IADALSYL---         | N-FN-LI-HRDLKPNL (11) NVS             | KI-YKYGI---                             | LFCQ---LKNKROK                     | RSTFC---GTFPE-YRABE                       |
| csnk1g1              | ---CDRTFLKTVL---MIAIQ---LILGAYL---          | S-KN-LI-HRDLKPNL---                   | GRQGNK-KE-HV---                         | LAK (4) ETKKHIPYRE                 | HSLT---GTFAR-YASIN                        |
| PBANKA 070970 pk1    | ---KKCFNENQVK---IYVYQ---LIRATLYL---         | S-LC-LI-HRDLKPNL (226) DE             | LDN-IY (16) YI                          | KIC                                | D                                         |
| PBANKA 090380        | ---ENLNNMSEAF---LYFIQ---LQGMWYIL---         | D-MN-LV-HRDLKPNL---                   | Y-SN-KK---                              | VIA                                | D                                         |
| PBANKA_080560        | ---SISQYQNPVK---FIQIT---LAKIL---            | N-GN-VI-HRDLKPNL---                   | RYSYIN-EN-E (16) EI                     | KICVI                              | D                                         |
| dapkl                | ---EKESLTEEAT---EFLKQ---LNGYYEL---          | S-LQ-LA-HRDLKPNL---                   | L-DRN-VBKPR---                          | LAKH---IDFGNE                      | FKNIF---GTFPE-YRABE                       |
| prkca                | ---QVGFKEPQAV---FYAAE---LILGAYL---          | K-RG-LI-HRDLKPNL---                   | D-SE-GH---                              | LAKH---HMDGVT                      | TRTFC---GTFPE-YRABE                       |
| MAL13P1.109          | ---VSDISNEDKK---KILYN---SLNLIIRL---         | D-RR-VI-HRDLKPNL---                   | S-PKN-YE---                             | LSQSTP (11) LNSIKPFS               | FQPCI---GTFPE-YRABE                       |
| MAL13P1.279 pk5      | ---CEGGLSHTAK---SFLQ---LNGAYCH---           | E-RR-VI-HRDLKPNL---                   | N-RE-GE---                              | LARA---FGI PVK                     | YTHEV---ITLW-YRABE                        |
| PBANKA 040820 cdpk3  | ---KKGFSVEMYS---FIMKQ---LPSVANYL---         | I-RN-IC-HRDLKPNL---                   | YDKS-TE-SL---                           | LAAV---FNIDYE                      | MTKA---GTFPE-YRABE                        |
| PF11_0377 ck1        | ---CNRRFSLKTVL---MTADQ---MNRREYV---         | S-KN-FI-HRDLKPNL---                   | GR-GK-KV-TL---                          | LIT                                | HTI---GTFAR-YASIN                         |
| PF0665w              | ---VPGSLDVEYIK---KIMKE---LPSVANYL---        | S-NN-LI-HRDLKPNL (196) CS             | LHN-YN (16) NM (8) SDIC                 | II                                 | D                                         |
| PF14_0320 tk14       | ---CKIKYIVLFI---LHIFQ---LIDKKNIL---         | K-KG-LA-HRDLKPNL (41) HMN             | HI-YN (16) SV                           | NIY                                | D                                         |
| PF14_0294 map-1      | ---KADLLEIHKK---YIIFQ---LILGAYL---          | S-GG-LI-HRDLKPNL---                   | N-SE-CH---                              | LARS---ISTVHNKIPV                  | LIDYV---ATRW-YRABE                        |
| PF14_0346 pkg        | ---KLGLLRSQAQ---FYLGS---LILAEYEL---         | E-RN-IV-YRDLKPNL---                   | D-KQ-GY---                              | V-KIA                              | D                                         |
| PF1285w              | ---KRTVYNLNFVR---LTLLE---IANMSYIL---        | KPNIKQEFYI-HRDLKPNL---                | KG-KK---                                | LIT                                | D                                         |
| camk2a               | ---AREYVSEADAS---HCIOQ---LEAVLHCH---        | Q-MG-IV-HRDLKPNL---                   | A-SKL-KG (2) --                         | V-KIA                              | D                                         |
| PF0800c nek-3        | ---NNEIYSESEIF---NLLHQ---LNGNYL---          | Q-NG-LI-HRDLKPNL---                   | KD-NK---                                | KIG                                | D                                         |
| MAL13P1.196          | ---KKGLNMLVLL---DLRQ---KKGITL---            | K-KG-LI-HRDLKPNL---                   | S-ST-TFFT---                            | V-RIG                              | D                                         |
| PBANKA 031030 pk7    | ---ESYFIPVPIK---CMVKK---LKSILYV---          | T-KN-IC-HRDLKPNL---                   | D-KN-GI---                              | KIN                                | D                                         |
| MAL13P1.84           | ---RMKQKRENN---KND---LQAGYEL---             | K-ND-FA-HRDLKPNL---                   | D-LDSN-IK---                            | EIC                                | D                                         |
| PBANKA 071990 crk1   | ---KSPGFTVSELK---CLIKQ---LNGNYL---          | T-NW-VI-HRDLKPNL---                   | S-NK-GI---                              | KIC                                | D                                         |
| PBANKA 142160        | ---GFNILEKEVK---IVSQ---LILGAYL---           | I-KG-LI-HRDLKPNL (38) KEN             | IK-NN (9) --                            | V-KIC                              | D                                         |
| PBANKA 083560 PKAcac | ---RNKRFNDVGC---FYAAQ---YVLIYEL---          | S-LN-LV-HRDLKPNL---                   | D-KD-GF---                              | L-KMT                              | D                                         |
| PF14_0516 kin        | ---NNYINNNAR---RIIYQ---LILGAYL---           | E-IK-LV-HRDLKPNL---                   | D-NN-NN---                              | V-KIA                              | D                                         |
| PF14_0392            | ---NKLYLDEVSAQ---YFFRK---YVGGKYM---         | K-NN-LA-HRDLKPNL---                   | CKIQ-IS (16) DL                         | KIG                                | D                                         |

Tewari et al., Figure S1 A (cont.)

|                      |                                                                                                                                                                                                |
|----------------------|------------------------------------------------------------------------------------------------------------------------------------------------------------------------------------------------|
| PFB0520w tk11        | ---YKINMKLQDII---KISKD---ITAFMSYFL---N-KG---IM-HCDLSSNLI---S---IT---RD---I---KIC---D---LALSVF---NKYNKPK---YLGIV---GTQY---WTAPE---VL---RSEG---Y---TK---EADYSP---VILWEMI---HR-KIPF---            |
| PFL1370w nek-1       | ---MFGKIEBHAI---DITRQ---LHAAYCH(4)GP-NGERVL---HRDIPKPNIL---D---SD---GI(16)P---AKIG---D---LALSKN---IGIESM---AHSVY---GTPY---YAPPE---LL---LHETKS---Y---DD---KSDMAL---CITYELC---SG-KTFF---         |
| PBANKA_101090 tk14   | ---NRIFYKIQLK(5)LNFIQ---IEQIYIV---K-KK---IT-HFDINTCNILI(93)MKK---KD---CQ(6)I---VHS---D---LRESKF---FLRDTDFIF---FRKNR---GNEI---LAAPB---LL(77)-DKIRILRY(6)KS(40)KSDIWSL---SLLYEMI---TN-ESLF---    |
| PFL1280c             | ---DEKVLGIDISL---KMCRO---LAEVINFLR(4)NK-KN---VI-HRDIPKPNILI---D---SD---WN---I---HIC---D---LADAE---CEDGI---FNVVS---GATWI---YAPPE---LLTCHPLKQSSDYNF(6)SY---KWDIWSM---CVFORMM---NL-PSPF---        |
| cdk2                 | ---ALTGIFPLPLIK---SYLFO---LQGFAPCF---S-HR---VL-HRDIPKPNILI---N---TE---GA---I---KIA---D---LALARA---FGVPTV---YTHEV---VTLW---YRABE---IL---LGCK---Y---ST---AVDIWSL---CIFAEMV---TR-RALF(11)---      |
| PBANKA_135090 crk-6  | ---KIYNLNKEVK---YIIFE---LLALCYLY---S-NN---YL-HRDIPKPNILI---N---SK---GE---I---KIG---D---LALSVF---KSDN---MTPSV---VTIW---YRABE---LL---LKQNN---Y---DQ---KIDIWSL---CIFAELI---TG-RPLF(8)---          |
| PFL1415w             | ---NNRRKKEYKKK(11)EILRQ---LNVCLLY---R-NK---IF-HSDIKPSNIVI---N---KN---IH(16)YL(13)KI---D---LALSVF---KSDN---MTPSV---VTIW---YRABE---LL---LKQNN---Y---DQ---KIDIWSL---CIFAELI---TG-RPLF(8)---       |
| PBANKA_130920 lammer | ---DYNGFHIEDIK---LYCIE---LKAHYLYR---K-LK---IT-HRDIPKPNILI---D---DP---HF(16)QI(7)IKI---D---LALCATF---KSDN---MTPSV---VTIW---YRABE---LL---LKQNN---Y---DQ---KIDIWSL---CIFAELI---TG-RPLF(8)---      |
| PFB0815w cdpk1       | ---NRHFKDECDAA---NIMKQ---LISGICYLY---K-HN---IV-HRDIPKPNILI---E---NKH---SL(2)I---KIV---D---LALSSF---FSKDNK---LRDLR---GTAY---YRABE---VL---RKK---Y---NE---KCDVWSC---VILYLLI---CG-YPPF---          |
| mapk1_1-289          | ---KTQHLSDNDHC---YFLYQ---LQGFAPCF---S-AN---VL-HRDIPKPNILI---N---TT---CD---I---KIC---D---LALARV---ADPDHDTGF---LLEYV---ATRW---YRABE---IM---LNSKG---Y---TK---SIDIWSV---CILAEMI---SN-RPIF(11)---   |
| PFL1_0242 cdpk7      | ---AETRLSEIHAN---KIIQK---LKTAYLY---R-CG---LI-HRDIPKPNILI---TDKS---RD---AQ---I---KIT---D---LALSTL---CAPNEL---LKEPC---GTLA---YRABE---VI---TLQG---Y---NH---KVDWSI---LILYLLI---SG-KLFF---          |
| PBANKA_030850 tk11   | ---KKTKIKILDII---KMCKD---LISGICYLY---N-KG---LV-HRDIPKPNILI---S---ES---GE---I---KIC---D---LALSIQ---NFDMPKPK---FGLIV---GTQY---WTAPE---IL---RCEG---Y---TK---KADIYSF---VILWEMI---HR-TIPF---        |
| PFO8_0044 pk1        | ---KKSFLNENQIK---IYLYQ---LIRATLYLY---S-LC---IT-HRDIPKPNILI(245)ND---NT---DK---I(85)KIC---D---LALNTSIK---LKENYK---YFSYV---CSRY---YRABE---NE---LFGSNYV---SQ---ALDIWSI---CVMBELI---LG-KPLF(11)--- |
| PBANKA_082960        | ---KTYVYVPEMIA---EILRQ---LKAACYLY---E-NQ---Y-HSDIKPSNIVA---N---KN---IK(16)YI(13)KI---D---LALSVF---KSDN---MTPSV---VTIW---YRABE---LL---LKQNN---Y---DQ---KIDIWSL---CIFAELI---TG-RPLF(8)---        |
| MAL7P1.144           | ---TFLKTRRKDI---NILHA---CLKLIRIRL---D-AG---LC-HLDLTPDNILI---S---KS---MD---M---RJC---D---LALAKSTP(9)---KESEDSYK---FESYV---THVAKSA---YTPBCWEI(22)-ERRKQYF---DVA---CADKML---VFFFWIW---TN-GNLF---  |
| PBANKA_093300 prk4   | ---NGHGLNAAAVH---CYTRQ---LFIARHMR---K-CR---IM-HADIPKPNILI---N---EK---FN---A---LKV---D---LALASAD---ISENE---ITSYL---VSRF---YRABE---II---LGFR---Y---DS---QIDVWSA---AATVPELA---TG-KILF(11)---      |
| PBANKA_130690        | ---KKGKGLTLGLQ---QILTK---NLEGAAYLY---S-KN---IT-HCDIPKPNILI(30)DSN---EK(6)DN(16)KI---D---LALNSCIY---ESDK---LEMYV---QTRP---YRABE---VL---LQNN---Y---DR---KIDIWSL---CIFAELI---TG-KILF(31)---       |
| PFL1_0060            | ---YKQVKNICK---YIILQ---LQGFAPCF---S-HR---VL-HRDIPKPNILI---N---TE---GA---I---KIA---D---LALARA---FGVPTV---YTHEV---VTLW---YRABE---IL---LGCK---Y---ST---AVDIWSL---CIFAEMV---TR-RALF(11)---         |
| PFL10141 mrk         | ---RKIFLTDQSKK---CILLQ---LNGNLYLY---K-YF---IM-HCDIPKPNILI(36)NND---HK---TN(9)Y---KIC---D---LALSVK---CGNEFFP---YRGIK---GSGY---FLIAPB---LF---HECN---F---NN---KIDMAL---THERYV---F---              |
| gsk3b                | ---AKQTLFVIYV---LYMYQ---LFRSAYLY---S-FG---IC-HRDIPKPNILI---D---PDT---AV---I---KIC---D---LALSAQ---LVGEPF---NVSIV---CSRY---YRABE---LI---FGATD---Y---TS---SIDIWSA---CVLAELI---LG-QPIF(11)---      |
| map4k1               | ---VTGSLSELQIS---YVCRE---S-QK---KI-HRDIPKPNILI---N---TT---CD---I---KIC---D---LALARV---ADPDHDTGF---LLEYV---ATRW---YRABE---IM---LNSKG---Y---TK---SIDIWSV---CILAEMI---SN-RPIF(11)---              |
| PFL1_0147 map-2      | ---TPIFLTEQHVK---TILYN---LQGFAPCF---S-AN---VL-HRDIPKPNILI---N---TT---CD---I---KIC---D---LALARV---ADPDHDTGF---LLEYV---ATRW---YRABE---IM---LNSKG---Y---TK---SIDIWSV---CILAEMI---SN-RPIF(11)---   |
| PFL13_0085 pk9       | ---NNGRKKKEYKKK(11)EILRQ---LNVCLLY---R-NK---IF-HSDIKPSNIVI---N---KN---IH(16)YL(13)KI---D---LALSVF---KSDN---MTPSV---VTIW---YRABE---LL---LKQNN---Y---DQ---KIDIWSL---CIFAELI---TG-RPLF(8)---      |
| MAL7P1.91 est        | ---NNGRKKKEYKKK(11)EILRQ---LNVCLLY---R-NK---IF-HSDIKPSNIVI---N---KN---IH(16)YL(13)KI---D---LALSVF---KSDN---MTPSV---VTIW---YRABE---LL---LKQNN---Y---DQ---KIDIWSL---CIFAELI---TG-RPLF(8)---      |
| PFL0125c             | ---GYSTLGRKAKK---KIMLS---LQGFAPCF---S-AN---VL-HRDIPKPNILI---N---TT---CD---I---KIC---D---LALARV---ADPDHDTGF---LLEYV---ATRW---YRABE---IM---LNSKG---Y---TK---SIDIWSV---CILAEMI---SN-RPIF(11)---   |
| PFL1_0464            | ---ENLSSNMNEAF---LYFIQ---LQGFAPCF---S-AN---VL-HRDIPKPNILI---N---TT---CD---I---KIC---D---LALARV---ADPDHDTGF---LLEYV---ATRW---YRABE---IM---LNSKG---Y---TK---SIDIWSV---CILAEMI---SN-RPIF(11)---   |
| PBANKA_092700 tk12   | ---TFLFLSFTSRI---NILVO---LNVFCYLY---N-TSSP---LV-HRDIPKPNILI---D---DK---FN---A---KIG---D---LALSAQ---LVGEPF---NVSIV---CSRY---YRABE---LI---FGATD---Y---TS---SIDIWSA---CVLAELI---LG-QPIF(11)---    |
| ck1                  | ---GFLPFRDLHIR---KIMYQ---LQGFAPCF---S-AN---VL-HRDIPKPNILI---N---TT---CD---I---KIC---D---LALARV---ADPDHDTGF---LLEYV---ATRW---YRABE---IM---LNSKG---Y---TK---SIDIWSV---CILAEMI---SN-RPIF(11)---   |
| PFB0385c             | ---KKQPLNEEVA---LVYFQ---LQGFAPCF---S-AN---VL-HRDIPKPNILI---N---TT---CD---I---KIC---D---LALARV---ADPDHDTGF---LLEYV---ATRW---YRABE---IM---LNSKG---Y---TK---SIDIWSV---CILAEMI---SN-RPIF(11)---    |
| mapkapk2             | ---GDQAFTEREAS---EIMKS---LQGFAPCF---S-AN---VL-HRDIPKPNILI---N---TT---CD---I---KIC---D---LALARV---ADPDHDTGF---LLEYV---ATRW---YRABE---IM---LNSKG---Y---TK---SIDIWSV---CILAEMI---SN-RPIF(11)---   |
| csn1                 | ---CSRKFLKTVL---LQGFAPCF---S-AN---VL-HRDIPKPNILI---N---TT---CD---I---KIC---D---LALARV---ADPDHDTGF---LLEYV---ATRW---YRABE---IM---LNSKG---Y---TK---SIDIWSV---CILAEMI---SN-RPIF(11)---            |
| pfc0105w srpk        | ---DYKGFPLNLRV---KATHV---LQGFAPCF---S-AN---VL-HRDIPKPNILI---N---TT---CD---I---KIC---D---LALARV---ADPDHDTGF---LLEYV---ATRW---YRABE---IM---LNSKG---Y---TK---SIDIWSV---CILAEMI---SN-RPIF(11)---   |
| pFA0380w eik2        | ---TRENMINRNRY---EIQM---LQGFAPCF---S-AN---VL-HRDIPKPNILI---N---TT---CD---I---KIC---D---LALARV---ADPDHDTGF---LLEYV---ATRW---YRABE---IM---LNSKG---Y---TK---SIDIWSV---CILAEMI---SN-RPIF(11)---    |
| PFL1685w PKAcat      | ---RNKRFPDVG---FYAQY---LQGFAPCF---S-AN---VL-HRDIPKPNILI---N---TT---CD---I---KIC---D---LALARV---ADPDHDTGF---LLEYV---ATRW---YRABE---IM---LNSKG---Y---TK---SIDIWSV---CILAEMI---SN-RPIF(11)---     |
| PBANKA_061580 est    | ---YNGOGLTESECK---FLYFQ---LQGFAPCF---S-AN---VL-HRDIPKPNILI---N---TT---CD---I---KIC---D---LALARV---ADPDHDTGF---LLEYV---ATRW---YRABE---IM---LNSKG---Y---TK---SIDIWSV---CILAEMI---SN-RPIF(11)---  |
| PFL1_0156 prk4       | ---NGHGLNAAAVH---CYTRQ---LFIARHMR---K-CR---IM-HADIPKPNILI---N---EK---FN---A---LKV---D---LALASAD---ISENE---ITSYL---VSRF---YRABE---II---LGFR---Y---DS---QIDVWSA---AATVPELA---TG-KILF(11)---      |
| PFL1_0476            | ---INGSCHTSEAR---VIIIK---LKTAYLY---R-CG---LI-HRDIPKPNILI(1)---T---KD---NT(2)Y---VHS---D---LALAKI---TPSNQSVVK---SRVGV---GDFY---YRABE---II---KKNK---Y---GI---KIDIWSL---VLIFFII---TG-KVFF---      |
| PBANKA_060060 nek-3  | ---NNEHYSSESEIF---NILNQ---LQGFAPCF---S-AN---VL-HRDIPKPNILI---N---TT---CD---I---KIC---D---LALARV---ADPDHDTGF---LLEYV---ATRW---YRABE---IM---LNSKG---Y---TK---SIDIWSV---CILAEMI---SN-RPIF(11)---  |
| MAL7P1.26            | ---KNVQYQ---NVPKS---LQGFAPCF---S-AN---VL-HRDIPKPNILI---N---TT---CD---I---KIC---D---LALARV---ADPDHDTGF---LLEYV---ATRW---YRABE---IM---LNSKG---Y---TK---SIDIWSV---CILAEMI---SN-RPIF(11)---        |
| PBANKA_031140        | ---VPGSLHYEIK---KIMKN---LQGFAPCF---S-AN---VL-HRDIPKPNILI---N---TT---CD---I---KIC---D---LALARV---ADPDHDTGF---LLEYV---ATRW---YRABE---IM---LNSKG---Y---TK---SIDIWSV---CILAEMI---SN-RPIF(11)---    |
| PFL0105cpw           | ---LAIIDNNKKK---KYLIE---LQGFAPCF---S-AN---VL-HRDIPKPNILI---N---TT---CD---I---KIC---D---LALARV---ADPDHDTGF---LLEYV---ATRW---YRABE---IM---LNSKG---Y---TK---SIDIWSV---CILAEMI---SN-RPIF(11)---    |
| PBANKA_093860 ck2    | ---PKFTDKDIR---YIYIQ---LQGFAPCF---S-AN---VL-HRDIPKPNILI---N---TT---CD---I---KIC---D---LALARV---ADPDHDTGF---LLEYV---ATRW---YRABE---IM---LNSKG---Y---TK---SIDIWSV---CILAEMI---SN-RPIF(11)---     |
| PBANKA_031420 cdpk1  | ---NRHFKDECDAA---NIMKQ---LISGICYLY---K-HN---IV-HRDIPKPNILI---E---NKH---SL(2)I---KIV---D---LALSSF---FSKDNK---LRDLR---GTAY---YRABE---VL---RKK---Y---NE---KCDVWSC---VILYLLI---CG-YPPF---          |
| PBANKA_010410        | ---EHGPFSEKVA---TMLFE---LQGFAPCF---S-AN---VL-HRDIPKPNILI---N---TT---CD---I---KIC---D---LALARV---ADPDHDTGF---LLEYV---ATRW---YRABE---IM---LNSKG---Y---TK---SIDIWSV---CILAEMI---SN-RPIF(11)---    |
| camk1                | ---EKGFYTERDAS---RLIFQ---LQGFAPCF---S-AN---VL-HRDIPKPNILI---N---TT---CD---I---KIC---D---LALARV---ADPDHDTGF---LLEYV---ATRW---YRABE---IM---LNSKG---Y---TK---SIDIWSV---CILAEMI---SN-RPIF(11)---   |
| PFD1175w             | ---EDTRVDRDCK---IMTPE---LQGFAPCF---S-AN---VL-HRDIPKPNILI---N---TT---CD---I---KIC---D---LALARV---ADPDHDTGF---LLEYV---ATRW---YRABE---IM---LNSKG---Y---TK---SIDIWSV---CILAEMI---SN-RPIF(11)---    |
| PFB0150c             | ---NYGRISBELLV---YILDQ---LQGFAPCF---S-AN---VL-HRDIPKPNILI---N---TT---CD---I---KIC---D---LALARV---ADPDHDTGF---LLEYV---ATRW---YRABE---IM---LNSKG---Y---TK---SIDIWSV---CILAEMI---SN-RPIF(11)---   |
| PFL1885c pk2         | ---NNGPYEQVAK---KAMKR---LQGFAPCF---S-AN---VL-HRDIPKPNILI---N---TT---CD---I---KIC---D---LALARV---ADPDHDTGF---LLEYV---ATRW---YRABE---IM---LNSKG---Y---TK---SIDIWSV---CILAEMI---SN-RPIF(11)---    |
| PBANKA_092520 cdpk7  | ---SETRLSEIHAN---KIIQK---LKTAYLY---R-CG---LI-HRDIPKPNILI---TDKS---RD---AQ---I---KIT---D---LALSTL---CAPNEL---LKEPC---GTLA---YRABE---VI---TLQG---Y---NH---KVDWSI---LILYLLI---SG-KLFF---          |
| prkaca               | ---IRGRFSEPHAR---FYAQY---LQGFAPCF---S-AN---VL-HRDIPKPNILI---N---TT---CD---I---KIC---D---LALARV---ADPDHDTGF---LLEYV---ATRW---YRABE---IM---LNSKG---Y---TK---SIDIWSV---CILAEMI---SN-RPIF(11)---   |
| PFL0095c             | ---YPKVFNKSKK---KILFE---LQGFAPCF---S-AN---VL-HRDIPKPNILI---N---TT---CD---I---KIC---D---LALARV---ADPDHDTGF---LLEYV---ATRW---YRABE---IM---LNSKG---Y---TK---SIDIWSV---CILAEMI---SN-RPIF(11)---    |
| PFL13_0211 cdpk5     | ---KYGSFSEYAY---KIMKQ---LQGFAPCF---S-AN---VL-HRDIPKPNILI---N---TT---CD---I---KIC---D---LALARV---ADPDHDTGF---LLEYV---ATRW---YRABE---IM---LNSKG---Y---TK---SIDIWSV---CILAEMI---SN-RPIF(11)---    |
| PFL1290w nek-2       | ---LETPIFEKIK---RWLQY---LQGFAPCF---S-AN---VL-HRDIPKPNILI---N---TT---CD---I---KIC---D---LALARV---ADPDHDTGF---LLEYV---ATRW---YRABE---IM---LNSKG---Y---TK---SIDIWSV---CILAEMI---SN-RPIF(11)---    |
| PBANKA_040940        | ---NRKAFSEESR---YLYFQ---LQGFAPCF---S-AN---VL-HRDIPKPNILI---N---TT---CD---I---KIC---D---LALARV---ADPDHDTGF---LLEYV---ATRW---YRABE---IM---LNSKG---Y---TK---SIDIWSV---CILAEMI---SN-RPIF(11)---    |
| nek1                 | ---KGVLFQDQIL---DMVQY---LQGFAPCF---S-AN---VL-HRDIPKPNILI---N---TT---CD---I---KIC---D---LALARV---ADPDHDTGF---LLEYV---ATRW---YRABE---IM---LNSKG---Y---TK---SIDIWSV---CILAEMI---SN-RPIF(11)---    |
| nek7                 | ---QKRLIPERTVW---KYVQY---LQGFAPCF---S-AN---VL-HRDIPKPNILI---N---TT---CD---I---KIC---D---LALARV---ADPDHDTGF---LLEYV---ATRW---YRABE---IM---LNSKG---Y---TK---SIDIWSV---CILAEMI---SN-RPIF(11)---   |
| PBANKA_093370 MAP-2  | ---TPIFLTEQHVK---TILYN---LQGFAPCF---S-AN---VL-HRDIPKPNILI---N---TT---CD---I---KIC---D---LALARV---ADPDHDTGF---LLEYV---ATRW---YRABE---IM---LNSKG---Y---TK---SIDIWSV---CILAEMI---SN-RPIF(11)---   |
| PFL0040c             | ---SDVRNDEFKK---ELLYK---LQGFAPCF---S-AN---VL-HRDIPKPNILI---N---TT---CD---I---KIC---D---LALARV---ADPDHDTGF---LLEYV---ATRW---YRABE---IM---LNSKG---Y---TK---SIDIWSV---CILAEMI---SN-RPIF(11)---    |
| PFL10_0160           | ---IFALHSYMKR---KILFE---LQGFAPCF---S-AN---VL-HRDIPKPNILI---N---TT---CD---I---KIC---D---LALARV---ADPDHDTGF---LLEYV---ATRW---YRABE---IM---LNSKG---Y---TK---SIDIWSV---CILAEMI---SN-RPIF(11)---    |
| PBANKA_135150 cdpk5  | ---KHGSFSEYAY---KIMKQ---LQGFAPCF---S-AN---VL-HRDIPKPNILI---N---TT---CD---I---KIC---D---LALARV---ADPDHDTGF---LLEYV---ATRW---YRABE---IM---LNSKG---Y---TK---SIDIWSV---CILAEMI---SN-RPIF(11)---    |
| PBANKA_145320 pk2    | ---NNGPYEQVAK---KAMKR---LQGFAPCF---S-AN---VL-HRDIPKPNILI---N---TT---CD---I---KIC---D---LALARV---ADPDHDTGF---LLEYV---ATRW---YRABE---IM---LNSKG---Y---TK---SIDIWSV---CILAEMI---SN-RPIF(11)---    |
| PBANKA_090110        | ---YHGFNELLAL---SWIKQ---LQGFAPCF---S-AN---VL-HRDIPKPNILI---N---TT---CD---I---KIC---D---LALARV---ADPDHDTGF---LLEYV---ATRW---YRABE---IM---LNSKG---Y---TK---SIDIWSV---CILAEMI---SN-RPIF(11)---    |
| PFL2280w gsk         | ---NKDKKIEIIV---NILQD---LQGFAPCF---S-AN---VL-HRDIPKPNILI---N---TT---CD---I---KIC---D---LALARV---ADPDHDTGF---LLEYV---ATRW---YRABE---IM---LNSKG---Y---TK---SIDIWSV---CILAEMI---SN-RPIF(11)---    |
| MAL7P1.18            | ---SKENISPEKTK---SIIQK---LQGFAPCF---S-AN---VL-HRDIPKPNILI---N---TT---CD---I---KIC---D---LALARV---ADPDHDTGF---LLEYV---ATRW---YRABE---IM---LNSKG---Y---TK---SIDIWSV---CILAEMI---SN-RPIF(11)---   |
| PBANKA_020580 eik2   | ---RRTIRINIKRN---EIIIM---LQGFAPCF---S-AN---VL-HRDIPKPNILI---N---TT---CD---I---KIC---D---LALARV---ADPDHDTGF---LLEYV---ATRW---YRABE---IM---LNSKG---Y---TK---SIDIWSV---CILAEMI---SN-RPIF(11)---   |
| PFL1_0227            | ---RSVGVNEKITF---NIIILQ---LQGFAPCF---S-AN---VL-HRDIPKPNILI---N---TT---CD---I---KIC---D---LALARV---ADPDHDTGF---LLEYV---ATRW---YRABE---IM---LNSKG---Y---TK---SIDIWSV---CILAEMI---SN-RPIF(11)---  |
| PFB0260              | ---ENGPFCEKVA---EMLFE---LQGFAPCF---S-AN---VL-HRDIPKPNILI---N---TT---CD---I---KIC---D---LALARV---ADPDHDTGF---LLEYV---ATRW---YRABE---IM---LNSKG---Y---TK---SIDIWSV---CILAEMI---SN-RPIF(11)---    |
| PBANKA_141360 pk9    | ---NNGYLSEKETY---FLFLQ---LQGFAPCF---S-AN---VL-HRDIPKPNILI---N---TT---CD---I---KIC---D---LALARV---ADPDHDTGF---LLEYV---ATRW---YRABE---IM---LNSKG---Y---TK---SIDIWSV---CILAEMI---SN-RPIF(11)---   |
| PFL1145c tk15        | ---NKNLHKKQRL---EMALQ---LQGFAPCF---S-AN---VL-HRDIPKPNILI---N---TT---CD---I---KIC---D---LALARV---ADPDHDTGF---LLEYV---ATRW---YRABE---IM---LNSKG---Y---TK---SIDIWSV---CILAEMI---SN-RPIF(11)---    |
| PFL1_0510            | ---NNNILSDREKK---KILYE---LQGFAPCF---S-AN---VL-HRDIPKPNILI---N---TT---CD---I---KIC---D---LALARV---ADPDHDTGF---LLEYV---ATRW---YRABE---IM---LNSKG---Y---TK---SIDIWSV---CILAEMI---SN-RPIF(11)---   |
| PFL1_0220 tk12       | ---TPIFLTEQHVK---TILYN---LQGFAPCF---S-AN---VL-HRDIPKPNILI---N---TT---CD---I---KIC---D---LALARV---ADPDHDTGF---LLEYV---ATRW---YRABE---IM---LNSKG---Y---TK---SIDIWSV---CILAEMI---SN-RPIF(11)---   |
| rock1                | ---SNYDVEKWAR---FYTAE---LQGFAPCF---S-AN---VL-HRDIPKPNILI---N---TT---CD---I---KIC---D---LALARV---ADPDHDTGF---LLEYV---ATRW---YRABE---IM---LNSKG---Y---TK---SIDIWSV---CILAEMI---SN-RPIF(11)---    |
| src                  | ---TGKYLRLPQLV---DMAAQ---LQGFAPCF---S-AN---VL-HRDIPKPNILI---N---TT---CD---I---KIC---D---LALARV---ADPDHDTGF---LLEYV---ATRW---YRABE---IM---LNSKG---Y---TK---SIDIWSV---CILAEMI---SN-RPIF(11)---   |
| PFC0060c             | ---FNTFLNKKKK---KILYE---LQGFAPCF---S-AN---VL-HRDIPKPNILI---N---TT---CD---I---KIC---D---LALARV---ADPDHDTGF---LLEYV---ATRW---YRABE---IM---LNSKG---Y---TK---SIDIWSV---CILAEMI---SN-RPIF(11)---    |
| PBANKA_122500 FIKK   | ---FNMKISNNEKS---YIYIQ---LQGFAPCF---S-AN---VL-HRDIPKPNILI---N---TT---CD---I---KIC---D---LALARV---ADPDHDTGF---LLEYV---ATRW---YRABE---IM---LNSKG---Y---TK---SIDIWSV---CILAEMI---SN-RPIF(11)---   |
| pak1                 | ---TECMDGQIA---AVCRE---LQGFAPCF---S-AN---VL-HRDIPKPNILI---N---TT---CD---I---KIC---D---LALARV---ADPDHDTGF---LLEYV---ATRW---YRABE---IM---LNSKG---Y---TK---SIDIWSV---CILAEMI---SN-RPIF(11)---     |
| PFL1_0431 lammer     | ---NYNGFHIEDIK---LYCIE---LKAHYLYR---K-LK---IT-HRDIPKPNILI---D---DP---YF(16)QI(7)IKI---D---LALCATF---KSDN---MTPSV---VTIW---YRABE---LL---LKQNN---Y---DQ---KIDIWSL---CIFAELI---TG-RPLF(8)---      |
| PFL1_0408            | ---RKGLTLGLQ---QILTK---NLEGAAYLY---S-KN---IT-HCDIPKPNILI(111)NN---NN---NN(16)KI---D---LALNSCIY---ESDK---LEMYV---QTRP---YRABE---VL---LQNN---Y---DR---KIDIWSL---CIFAELI---TG-KILF(31)---         |
| PFL2250c pbk         | ---KREFSEETAK---FYSSE---LQGFAPCF---S-AN---VL-HRDIPKPNILI---N---TT---CD---I---KIC---D---LALARV---ADPDHDTGF---LLEYV---ATRW---YRABE---IM---LNSKG---Y---TK---SIDIWSV---CILAEMI---SN-RPIF(11)---    |
| egfr                 | ---HKDNIGSQYLL---NWCQY---LQGFAPCF---S-AN---VL-HRDIPKPNILI---N---TT---CD---I---KIC---D---LALARV---ADPDHDTGF---LLEYV---ATRW---YRABE---IM---LNSKG---Y---TK---SIDIWSV---CILAEMI---SN-RPIF(11)---   |
| PFD0740w crk-3       | ---YANLFSIGEIK---NIFIQ---LQGFAPCF---S-AN---VL-HRDIPKPNILI---N---TT---CD---I---KIC---D---LALARV---ADPDHDTGF---LLEYV---ATRW---YRABE---IM---LNSKG---Y---TK---SIDIWSV---CILAEMI---SN-RPIF(11)---   |
| MAL7P1.73            | ---GFNLQEQVQ---IILQY---LQGFAPCF---S-AN---VL-HRDIPKPNILI---N---TT---CD---I---KIC---D---LALARV---ADPDHDTGF---LLEYV---ATRW---YRABE---IM---LNSKG---Y---TK---SIDIWSV---CILAEMI---SN-RPIF(11)---     |
| PBANKA_121280 mrk    | ---RKILLTDSQKK---CILLQ---LQGFAPCF---S-AN---VL-HRDIPKPNILI---N---TT---CD---I---KIC---D---LALARV---ADPDHDTGF---LLEYV---ATRW---YRABE---IM---LNSKG---Y---TK---SIDIWSV---CILAEMI---SN-RPIF(11)---   |
| map2k1               | ---KAGRFPEQILG---KVSIA---LQGFAPCF---S-AN---VL-HRDIPKPNILI---N---TT---CD---I---KIC---D---LALARV---ADPDHDTGF---LLEYV---ATRW---YRABE---IM---LNSKG---Y---TK---SIDIWSV---CILAEMI---SN-RPIF(11)---   |
| PFD0865c crk-1       | ---KSPFTISELK---CILLQ---LQGFAPCF---S-AN---VL-HRDIPKPNILI---N---TT---CD---I---KIC---D---LALARV---ADPDHDTGF---LLEYV---ATRW---YRABE---IM---LNSKG---Y---TK---SIDIWSV---CILAEMI---SN-RPIF(11)---    |
| PFL1_0733            | ---DDLVTVEEKK---SILYK---LQGFAPCF---S-AN---VL-HRDIPKPNILI---N---TT---CD---I---KIC---D---LALARV---ADPDHDTGF---LLEYV---ATRW---YRABE---IM---LNSKG---Y---TK---SIDIWSV---CILAEMI---SN-RPIF(11)---    |
| PFL0100c             | ---KENLVITKRRK---KILFE---LQGFAPCF---S-AN---VL-HRDIPKPNILI---N---TT---CD---I---KIC---D---LALARV---ADPDHDTGF---LLEYV---ATRW---YRABE---IM---LNSKG---Y---TK---SIDIWSV---CILAEMI---SN-RPIF(11)---   |
| PBANKA_135260        | ---KKQNICMLVIK---DLMHQ---LQGFAPCF---S-AN---VL-HRDIPKPNILI---N---TT---CD---I---KIC---D---LALARV---ADPDHDTGF---LLEYV---ATRW---YRABE---IM---LNSKG---Y---TK---SIDIWSV---CILAEMI---SN-RPIF(11)---   |
| PBANKA_130840 eik1   | ---GFYKNEKLIW---ELIQY---LQGFAPCF---S-AN---VL-HRDIPKPNILI---N---TT---CD---I---KIC---D---LALARV---ADPDHDTGF---LLEYV---ATRW---YRABE---IM---LNSKG---Y---TK---SIDIWSV---CILAEMI---SN-RPIF(11)---    |
| PFL1_0096 ck2        | ---LYPKFTDKDIR---YIYIQ---LQGFAPCF---S-AN---VL-HRDIPKPNILI---N---TT---CD---I---KIC---D---LALARV---ADPDHDTGF---LLEYV---ATRW---YRABE---IM---LNSKG---Y---TK---SIDIWSV---CILAEMI---SN-RPIF(11)---   |
| PBANKA_131370        | ---INGSCHTSEAR---VIIIK---LKTAYLY---R-CG---LI-HRDIPKPNILI(1)---T---KD---NT(2)Y---VHS---D---LALAKI---TPSNQSVVK---SRVGV---GDFY---YRABE---II---KKNK---Y---GI---KIDIWSL---VLIFFII---TG-KVFF---      |
| Consensus/80%        | .....bpb.....bh.p.....lh.sl.bh.....p.....lh.HpDIPKPNILI.....p.....pp.....l.....+lh.....D.....FG.T.....hps.h.....s*.....a.sPE.....l.....a.....s.....p.Dbashghhbbbbb.....a.....                  |



Tewari et al., Figure S1 A (cont.)

X XI

PFI0120c -LWYISDPIIDINY (2) --YKKNMNFNKIWTLEW-----PKKIK--RIIR--QLLDL-DRRKNLN--LN--DLIN--DPWFTR-  
PBANKA 141450 )LIEVLGSPNINFY---ENIKDYTSTKNTSLIKEL-CELDIPPLSWD---HIG--NLIKEDPNEIK--ID--EVLN--NSYF-  
MAL8P1.203 -LWKCSDPLQDEDF (2) --FVKCDMNFDFELTKNW-----PNEIK--DIK--QLLHV--RQRKLN--LK--DLA--HPW-  
Hs akt1 -----YNQDH-----EKLFEILMEEIRFPRT-----LQPEAK--SLLS--GLLKK--DPKQLG (5) AK--EIMQ--HRFF-  
MAL13P1.278 -----DGTQTQI-----VESIFSCNLKFPDF-----VNPLAI--DLK--KTLVV--DVNKRIR--LC--ELSS--DPWM-  
PBANKA 041040 gsk3 )IIQILGTPTEDEQ---KVMNPNYADVFPNVKPKD (5) PKGTPNNAI--NFVS--QFLKY--EPLKRLN--AI--EALA--DPFF-  
Hs limk1 -----LPRTMDF-----GLNVRGFLDRYCPNCC-----PPSFF--PITV--RCDDL--DPKRRPS-----FVKL--EHWL-  
PBANKA 112690 pk4 -NTIMERYKTLNDF-----RNYTVPDYVKIHLNFW-----YILM--LQMSKPNPADRPS--AA--DLVN--KI-  
Hs rak -----KGLEGLQV-----ANLVVEKNERLTIPISSC-----PRSA--ELH--QWRA--DAKRRPS--FK--OITS--IL-  
PBANKA 144300 nek-1 -----HKANN-----FSQLISELKKGPPELPK-----GSKSELN--FLK--NLNL--SAKERPS--AL--CCLG--YQIT-  
PBANKA 080800 crk-4 )VFRGIPDQNFNRL---LKKELVGGELPKFKVDRI (13) RILNDRGL--DLID--QFLSY--DYKNRIT--AN--EALK--HEWF-  
PBANKA 092640 -----DGSSTEW-----FYNKIKKREINYPPII-----PLDLV--DLTE--KLVVI--NPKRIG (4) CE--DILQ--HPYF-  
PBANKA 123020 crk-5 )IVNSLGGPNNDEL---EYFSDSRFPYFKDDF (17) GKIDELGI--DLIV--KMLKY--NPNDRIT--AA--DALG--HPWF-  
PBANKA 094200 PMSFMNRYNRTKDI (2) --KKEKKGINFNLSFNNY-----PLAK--DLQ--QFLQF--DPKRRIK (5) SY-----HPWL-  
PFI0\_0380 -IWKRADPSKDKIF (2) --LLNYNMDINSLAEADW-----PKGLK--NIN--KLLDL--ESRKRIN--LD--DLVK--HPWFY-  
PBANKA 100820 pkg -----GNDQEDQ---LEIFRDLTGLTQTFPDY-----VTDTSI--NLK--RLCR--LPQGRIG (5) FK--DIKE--NSFF-  
PBANKA 130520 -----DNEEKDI---KEAHNEIVNKKIIFPKN--RINRCSNNVK--NLI--GMNI--NPNNLS--LD--QVIN--DPW-  
PFI0750w )IVNSLGGPNKDEL---EFFSNSRFPYKDEDF (17) GRIDELGI--DLIV--KMLKY--NPNDRIT--AA--DALG--HPWF-  
PBANKA 061670 nek-4 -----HSTKGIQ---QLCYNIRYAPLPDLNPI-----YSKELN--NIYK--SMIR--EPNYRVT--VO--QLLV--SDIV-  
PFC0420w cdpk3 -----FGSDHE---ILSMVKKGYQFKGKWF-----NNISEAK--DLK--RCLTM--DADKRIC--AS--EALQ--HPWF-  
insr 1-276 -----QGLSNEQ---VLKFMVMDGGYLDQPDNC-----PERVT--DLMR--MCMQF--NPKRPT--FLBIVNLLKDDLHPSF-  
PBANKA 082690 --OHYIISFDESQD---IYKLVVDVTKKLPKPI--HSKIDNSPFA--DIK--LCLNY--DPNLRPT--AK--EIVD--LL-  
PBANKA 061520 cdpk4 -----NGSNEYD---ILKQVETGKYTFDLQPF-----KKISDKAK--DLK--KMLMY--TSAVVIS--AR--DALE--HEWI-  
PFI0110C -LWKNKADSLDNDF (2) --FKENMMMLDIPPTQTW-----PEELK--YIS--QLLVL--ETRKNLQ--FK--DLIN--HPWFS-  
pfl4\_0423\_1-361 --STSMERSITLSN---LLKGIYPEYMKADNKKF-----QFLS--SLAI--NPOECC--AY--NLH--ESVL-  
PBANKA 082710 ----- (2) --YDNYKIDLKHFEIQDF-----LI--NLIL--VQDE--SPFMRPS--FS--EIR--LL-  
PBANKA 112270 tk15 -----YNSKNTK---IRHELIVNKRPHIPSPF-----LPNSIK--KCLQ--KCFSF--NPKRPS--AY--EM--YKAL-  
PBANKA 091210 ckl QGLKAI SKDKYDK---IMKKISTSVVLCRNT-----SFEFV--TYLN--YCRSL--RFEDRPPDYTLR--RLK--DLFI-  
PFC0525c gsk3 )IIQVLTGTPTEDEQ---KEMNPNYADIKFPDVKSKD (5) PKGTPDEAI--NLIT--QFLKY--EPLKRLN--PI--EALA--DPFF-  
PFI0605w pk7 -SLVELFNIRTKNI---EYPLDRNHFLYPLTKNK (4) NNFLSNEDI--DFLK--LPLRK--NPAERIT--SE--DALK--HEWL-  
PBANKA 101980 cdlk -----EGKNTQK---IVDEILNKNINWKNDF-----SSLSVEAI--DFLK--KLLER--NERKRLT--AF--EALN--HPWI-  
PFI07\_0072\_cdpk4 -----NGSNEYD---ILKQVETGKYTFDLQPF-----KKISDKAK--DLK--KMLMY--TSAVVIS--AR--DALE--HEWI-  
raf1 ---SHINNRDQII (2) --VGRGYASPLDSKLYKNC-----PKAMK--RLVA--DCVKK--VKEERPL--FP--QILS--SIEL-  
PFC0485w -----KCSLDKDI---YKMFKNKNYKQLLKEK--KGLHLSKQVI--DLIF--NCLHP--NFNIYRN--IN--EALN--HDWF-  
PBANKA 113320 pk5 )IFKILGTPNSQNW--PDVFKLKYDFNFPVYNPLPWEFTIKGLDQDGI--DLIS--KMLK--DPNCRIT--AK--QATE--HPYF-  
PFI1\_0239\_cdpk6 -----GNTYDEVK---QSIFRDEDPYKSLKSKL-----SQTAL--HMLK--LMLQK--DYNKRPM--AS--VLLH--HPWF-  
PFI3\_0206\_crk-6 )IYLLGDKDKLTT---VKERKDMFPYFIEINLI--KDAIDDEHTL--DLIS--KMLY--DPNCRIS--SK--EALK--HPCF-  
PBANKA 136210 tk13 -----DGLSSSET---FCKISSGELHLPDPNDI-----PKDLS--DLK--SVLEY--DFTKRFLEVDIA--RKLE--HIWE-  
MAL7P1.100 nek-4 -----HSTKGIQ---QLCYNIRYAPLPDLNPI-----YSKELN--NIYK--SMIR--EPNYRAT--VO--QLLV--SDIV-  
PFE0045C -IWHCSDASTDENF (2) --FEKCDMSLDVDFQLTSTW-----PSGLK--NIN--ELLHI--EKRRMLV--LR--NLS--YFWFTK-  
PFD1165W -IWEKADSNDRKF (2) --FVKCGMDLYNYELTYNW-----PDDLK--DIIN--QLLPL--ENRAQLS--LK--ELCK--HPWWSN-  
PBANKA 146000 pkb -----NGSRDL---LFEINIKYKIKISNRL-----SPEVV--DLK--KLLQK--NPKRIG (5) AE--EIKK--HPFF-  
PBANKA 080220 -LFEEISIDKWEDE (2) --NKNKEIIVFPFSLFHNV (40) KFDPRKIR (9) EIR--KALSL--DVCDQYS--NVS--QIME--SSIF-  
PFI4\_0227\_cdlk -----EGKNTPKVVVL---QLKHTKLDIENLNKNIN (4) FSSLSIEAV--DFLK--RLLER--NEKRLT--AY--QALH--HPWI-  
PFI1370w -TTIMERYKRLNDF-----RNYTVPDYVKIHLNFW-----YILM--LQMSKPNPADRPS--AA--DV--YSKI-  
tgfbr1 -YDLVSPDSVEEM---RKVVCEQKLRPNIPNRW-----QSCEALRMA--KIMR--EOWYA--NGAARIT (5) KTLSQLSQ--QEGI-  
PBANKA 101330 )IEIVGKPNKKDI (10) IISFADTGRKKKFKFSEI---FHKASQDSI--DLLE--KLLQF--NPKRIT--AE--MALK--HKYV-  
PFI3\_0258\_tk13 -----DGISASEV---FCKISSGELFLPDKDI-----PMELS--ELK--SMLEY--DFTKRFPL--FN--VIK--KLEQI-  
PBANKA 146050 gak )NDENVNINFSNNS---FLSILNGSFVPHVTKY-----SKRII--SILL--MTLDK--NPKRIS--SS--TLL--IL-  
PBANKA 113310 -----DGTQTQI-----VQSISYCNLNFNPF-----INPLAI--NLK--KALVV--DVNKRIR--LS--EIAS--DPWM-  
PBANKA 122880 tk16 -----QNIKEKED---IVVELLVNKKKPNIPKW-----FNPEFT--EIK--RSFST--NPKRPS--CK--EYLN--LL-  
MAL7P1.175 -LWKRSDPSYDLQY (2) --FEQFDMILDQPKTKRW-----PKELK--NIK--QLLHM--DYRKNLN--LN--DLSK--NPKWSS-  
PBANKA 092550 cdpk6 -----TNTYEVK---QNIENSEPPYQFLKLMK-----SKPAL--HLK--LMLK--DYRKRPM--AA--VLLH--HPWF-  
PBANKA 131800 kin -----NHNDI---NKLQOIKGLMQFEPH-----VSNAK--NLQ--NMNV--NCKNRYN--LN--QIKN--HIWF-  
PBANKA 040110 SRPK )IEVLGNIPIKSMI (7) KYFNKNYKRLKNKIKKRY (8) KYGLPEKEINPLCSPLL--PMISI--DPQTRPS--AY--TMLQ--HPWL-  
PBANKA 071730 crk-3 )IVNKIGVFNNDY---KFLKRLPLWKKIKFNPI (23) NGVGEIGL--DLK--KLLK--DPLERIS--AH--DALG--HPWF-  
PFC0755c crk-4 )VFRGIPNENFDDL---LKEFELGELPKFKIDRL (13) RILSDEGL--DLID--QFLSY--DYKNRIT--AN--EALK--HKWF-  
PFA0130C -LWDSAMEEDDYS---KFKVSDMNFDSFELTKSW-----PEGLK--VILK--QLLDE--NRRKNLN--FN--DLVI--HPWWSY-  
PFI0150c -LWYKSDPLQDKDY (2) --YKSNMNFNFKWTFW-----PKELK--IIL--RLDL--EKRKNLN--LN--DLIS--HPWFSK-  
PFI0520w cdpk2 -----YDGTDNE---VLKVKKGEFCFYENDW-----GSISSDAK--NLIT--KLLTY--NPNRCT--IE--EALN--HPWI-  
PFI1\_0488 -QFNYLEKCSKELL---VNMKNGLTYPKINQKI-----SNATL--SYIQ--YLNLF--DYELRPS--IE--EALS--YPIF-  
map3k3 -----AEYEAM (2) --IFKIATQPTNPQLPSHI-----SEHGR--DFLR--RIFV--EAKRPS--AE--ELLT--HHPA-  
PBANKA 124070 nek-2 -----KSKNGNM (2) --IVQKVCEQDPPLPSIY-----SKDLR--NLCY--WMSK--CSEKRP--VY--DIIG--TEYF-  
PBANKA 040740 -----TDNSQ---ERIFEQIKKEDFHPKKT-----VSQAR--ELL--RLCSR--SSEKIS--AE--EVKS--HPWI-  
csnk1g1 QGLKADTLKERYQK---IGDTRKNTPIEALCENF-----PEEMA--TYLR--YVRL--DFEKPDP-----YEXL (4)  
PBANKA 070970 pk1 )IIKILGTPNDEDF (2) --FRSIYKNVFPNPKIPIT (5) SNNSKESI--DLID--KLLQF--NPKRIR--LC--SALL--HNYF-  
PBANKA 090380 -VECSKVAQIILKTV (2) --LRYSKPSPFRFRENKAW-----DLFV--KLTSS--NPNRIS--LQ--NVLD--HPWV-  
PBANKA 080560 -----PKLEEDI---LLGYETQSNPF-----LLEIR--KLETV--KQRGRK-----RPMV-  
dap1 -LGDTHQE---TLANVSANVEFEDEYF-----SNTSALAK--DFLR--RLLVK--DPKRRMT--IQ--DSLQ--HPWI-  
prka -----DGEDEDE---LQSIMHNSVSPKS-----LSKEAV--SICK--GLMTK--HPAKRLG (5) ER--DVRE--HAPP-  
MAL13P1.109 -IWKSDPIQDKIF (2) --FMKSNMDLNFIMTKSW-----PHELN--NLNVIIYKLLHM--BHRKTVK--LS--DLR--HPWSS-  
MAL13P1.279 pk5 )IFRILGTPNSKNW--PNVTELPKYDFNFTYEPLEPWESEFLKGLDESGI--DLIS--KMLK--DPNCRIT--AK--QATE--HAYF-  
PBANKA 040820 cdpk3 -----YGESDHE---ILSMVKKGYNFKGKRW-----NNISEAK--DLK--RCLTI--DSGKRIN--AS--EALK--HPWF-  
PFI1\_0377\_ck1 QGLKAI SKDKYDK---IMKKISTSVVLCRNT-----SFEFV--TYLN--YCRSL--RFEDRPPDYTLR--RLK--DLFI-  
PFI0665w -----EINNYMPIHL---KKILMENKPKFEPFIW-----KQHTDLL--DLCL--RLIDP--NPNTIQ--NA--EALI--HYSF-  
PFI4\_0320\_tk14 -NFLYIKLYKRDLL---KNIINNDIQHFYIKY-----LLEY--NTINP--NIKRRS--LN--DLRR--QT-  
PFI4\_0294\_map-1 )IIQVIGKPNKKDI (4) SPFAEKISSFVLDLKKKMLKDCYKASNESL--DLLE--KLLQF--NPKRIS--AE--NALK--HKYV-  
PFI4\_0346\_pkg -----GNDEEDQ---LEIFRDLTGLTQTFPDY-----VTDTSI--NLK--RLCR--LPQGRIG (5) FK--DIKE--NSFF-  
PFI1285w -----FSDHMYDINLSHFEPQDEF-----LI--NLIL--ACIDD--NPKRPT--FE--EI--SRLL-  
camk2a --WDEDQRLYQOI-----KAGAYDFSPSEW-----DVTPEAK--DLIN--KMLTI--NPKRIT--AA--EALK--HPWI-  
PFI0080c nek-3 -----ISLFDKKNYSYIINKI---SSIYSQKLV--NVIS--KLLSL--NTELE (5) NL--ETQ--HVLH-  
MAL13P1.196 )PWWKSTHNLRL (53) SLYTNNNNFIMNKKY (33) PLCSGDMC (69) DLAR--QLLNF--DYERIT--AE--QALN--HPWF-  
PBANKA 031030 pk7 GLNINLQEIKAEEI---KYHIDRNYFLKVRKGA (5) HDLSNDDI--NFLK--IFKK--KPTERT--AE--EALD--HKWL-  
MAL13P1.84 )LIEVIGSPQMSFF---ENIKDHTSKNLLIKEL--CELNLIKPLCWD---ELG--NLI--EENPNERLN--ID--AVLS--NPFY-  
PBANKA 071990 crk1 )ILNLLGLPKETY (15) -FKKKIKMNVNRRSHF (8) GLVLSDIGL--DLK--KLLHP--NPQDRMS--AS--DALK--HPYF-  
PBANKA 142160 -----YPCSRFEKVI FHERYW-----HNSPEAK--NFKQ--SLEI--DPFKRN--VI--EAMD--HPW-  
PBANKA 083560 PKAcat -----YANEP---LLIYKILEGIYFFKPF-----LDNCK--HMK--KLSH--DLTKRYG (5) AQ--SVKE--HPWF-  
PFI4\_0516\_kin -----NNSDM---NKLFTQIKGLIYFQPY-----VSKAK--HLQ--NMNV--NPKRPT--MN--KIKN--HIWF-  
PFI4\_0392 -DSEDKDV---KEAYNEIHKKIVFPKN--RVNKFSTSVR--SLL--AMNI--NPKRIS--LD--EVMK--HEWL-  
PFI0520w tk11 -----SDMNPLDI---IAHVGANIKLSTVTKN--IPDLK--YILH--SCHK--NTHKRS-----FLW--SEYF-



Tewari et al., Figure S1 A (cont.)

PFL1370w nek-1 -----HKANN-----FAQLISELKRGPPELPIK-----GKSKEIN---LLK---NLNL-SAKEPS--AL--OCLG--YQII---  
PBANKA\_101090 tk14 NYYNFYIKYIEKK-----ELLNELNKKIKTQF-----KELK---YFFN---FFQF-DLKKRD--VY--EYK(5)YNFY---  
PFI1280c\_1-286 --QHYITTFDESQ---IYKLVDFVTKKLPPTC---HSKIENSPA---DITR---LCLNY-DPNLRPT--AS--EIVQ---LL---  
cdk2 )IFRTLGTDPDEVV-----PGVTSMPDYKPSFPPK(8)VPPLDEDR---SLIS---QMLHY-DPNKRIS--AK--AALA---HPFF---  
PBANKA\_135090 crk-6 LDLIYATLGNKTEI-----AMDNIERYNSFPYEEHILKSMISDESVC---DLIS---KMLTY-DPYFRIS--SK--EALK--HSCF---  
PFI1415w ---SKINNDVHIY---FILSNKFKIKRKLKKY-----HYLSQPCK---DLK---KMLTY-NYENRIS--FI--QVFK--HSFT---  
PBANKA\_130920 lammer )LMENIIEPIPKMLYEATKTNGYKIDKNDLKLAW(24)---HDLFC---DFLY---TLIRI-DPTLRAS--PV--DLLK---HEFL---  
PFB0815w cdpk1 ---GGQNDQD---IKKVEKGYKDFDFNDW-----KNISEAK---ELK---LMLTY-DYNKRIT--AK--EALN--SKWI---  
mapk1\_1-289 )ILGILGSPSQEDL(4)NLKARNYLLSLPHKKNVFNRLFPNADSKAL---DLID---KMLTY-NPHKRIS--VE--CALA--HPYL---  
PFI1\_0242 cdpk7 ---PINKNT---EMNIQKNYVLSFKDYIW-----KSISSAK---DLIS---KLEL-NVEKRIS--AN--EALN--HIWV---  
PBANKA\_030850 tk11 ---NDLKHPLDI---IAQVGLYNQLIINNNI-----NNKLL---YVLT---SCHK-DKRKRIS--FF--EALN--SEYF---  
PFB08\_0044 pk1 )IIKILGTNDQEDF(2)---FRSVYKNIKFPDKPIT(5)RHNCSESL---DLIS---ELIQF-NPQKRIS--LC--HALL--HNYF---  
PBANKA\_082960 ---SSINNDMHVL---FLIQNKNFIDIKNSFSKY-----SYFSHSFK---DLIQ---KMLKY-EYQKRIS--FF--DLFF--HPFV---  
MAL7P1.144 ---LWVCSDDLQDDYF(2)---LMSKDMFNFPSCSNW-----PHGLK---HFK---QLLHM-KYRKLN--LN--ILGI--HPWYK---  
PBANKA\_093300 PRK4 )MMEYKGFSSHMI(4)FYSQHFNDLDFIYVDRDH(40)KKIKQLG---DLIE---KCLIL-DPSKRYT--PD--QALQ--HPYL---  
PBANKA\_130690 )IYYNDDDYFKE---DPIDEIEDEPVIYFNKND(40)TFLENNQ(7)---NFL---SLQI-DPCKRLN--SK--EALD--HPWL---  
PFI1\_0060 )MCLMINKYKTKDI(2)---KKEKGINFNLLSFHNY-----PIAK---DLCE---QLQF-DPNKRIS--NTV--CAAN--HPWL---  
gsk1\_0141 mrk )IFLLGTPTNENNW---PEALCLPLYTEFKATKDFKTYFKIDDDDCI---DLIT---SFLK-NAHERIS--AE--DAMK--HRYF---  
gsk3b )IIVLGTPTREQT---REMNPNYTEFKFPIKAHPW(18)PRTPEAI---ALCS---RLLEY-TPTARLT--PL--EACA--HSFF---  
map4k1 ---FDVHPLRVLFL---MTKSGYQPPRLKKEKGGK-----SAAFH---NFK---VTLTK-SPKRRPS--AT--KMLS--HQLV---  
PFI1\_0147 map-2 )IFNVIPTPEEDL---KCIKQEVIKYKLFPTPR(8)YSSISKEGI---DLIE---SMURF-NAQKRIT--ID--KALS--HPYL---  
PFI3\_0085 pk9 ---KYMKEKEL-----KNFESMTLNYANDI-----SDDLK---DLIS---LMLNY-DPNKRPI--IV--EILN--HRWF---  
MAL7P1.91 est )DYDIVSLQWGD(227)FKMNVQNDMMNPNKDYW(38)LNYSDEYW---DLIT---NLLNY-VPSEKRL--AC--EVLG--HDFE---  
PFI0125C ---FWNKADASVDKEY(2)---FARNMDFHKVEKTYHW-----PDGK---FLIQ---QLLHF-ESRKNLD--LN--DLIN--HPWFT---  
PFI1\_0464 )IECSKVAQTILKTV(2)---LRHSKPPSFRFRENKAW-----DLFV---KLTSS-NPIEELS--LQ--NVLD--HPWV---  
PBANKA\_092700 tk12 )VFDYLVNHNINND---YKSIYSILDYVNFDFP---LVEKLT---KLSF---LCLNF-NIKNRP--SKLV--NLIL---  
c1k1 )MMERILGLPLPKHM---IQTRKRYFHHDRLDW(24)DVEHERLF---DLIQ---KMLTY-DPAKRIT--LR--EALK--HPFF---  
PFC0385c ---TDDTQ---ERIPDQIKELNHFHFKS-----VSLAQ---ELIL---KLSR-TAEERIS--AD--EVKS--HPWI---  
mapkapk2 ---YSHGLAISFGM---KTRIRMQYFEPFNPW-----SEVSEEVK---MLR---NLKT-EPTQRYT--IT--EFMN--HPWI---  
csn1 )QGLKAATKRQYER---ISEKMSSTIEVLCKGY-----PSEFA---TYLN---FCRSL-RFDKPD--PD--YSYL--RQLF---  
pF0105w srpk )IIEVLGNIPKHM(7)KYFNKNYRLKRNIRIKKY(8)KYNLPEKISPLCSFL---PMLSV-DPQTRPS--AY--TMLQ--HPWL---  
pFA0380w eik2 ---ERMKI---LCNARHRIPLDLIKKH-----POVA---KLCQ---NLSL-DYHLRWT--SE--ELKPKKNIYI---  
PFI1685w PKAcat ---YANEP---LLIYQKILEGIIYFPKP---LDNCK---HLMK---KLSH-DLTKRYG(5)AQ--NVKE--HPWF---  
PBANKA\_061580 est )NYDILSLQWDD(234)FKANIQRDYMGNKEYW(38)LNYSDDYW---NLIA---DLIY-MPEKRL--AC--EVLG--HDFE---  
PFI1\_0156 prk4 )MMEYKGFSSHMI(4)FYSQHFNDLDFIYVDRDH(40)KKIKQLG---DLIE---KCLIL-DPSKRYT--PD--QALQ--HPYL---  
PFI4\_0476 ---TGKNANEL---YNNILKANIPPELLSKEK---SLNIQGLK---NLE---NLIVH-DPEKRF--CA--DILN--HRWI---  
PBANKA\_060060 nek-3 ---SANNINDM---IRLFEDKKNYKNEIINKI---SSFYSIQLV---DLIS---KLSL-MALDRLQ---VTSN--YNIVRN---  
MAL7P1.26 ---ALLEEDILAGYTKSNNF-----DEIK---KLEIVKQKRRK-----FMVG---  
PBANKA\_031140 ---EYNTMPTYL---KIKLIRYTPNFDPPFIW---QESPLL---DLCL---RLDP-NPLTRIQ--NAK--EALI--HCCF---  
PFI0105c ---LWDKATASQDEIF(2)---IVEKGMNLKALELTRKW---PRELK---SILK---NLSL-ESRKSFN--LK--DLID--HPWFTN---  
PBANKA\_093860 ck2 )IAKVLGTEDLHAY(5)IKLPHYLNILGEYERKFW(8)MDIAKDEVI---DLID---KMLTY-DPAKRIT--PK--EAME--HPYF---  
PBANKA\_031420 cdpk1 ---GGQNDQD---IKKVEKGYKDFDFNDW-----KNISEAK---ELK---LMLTY-DYNKRIT--AE--EALN--SRWI---  
PBANKA\_010410 ---GSTNEERED---IMNRIQDYHWSQLFSEK(5)IDKLSPEFK---NFLN---LCLDK-NPKKRPT--AE--ELIQ--HPFI---  
camk1 ---YDENDAK---LFEQILKAEYFDFSPYW---DDISDSAK---DFIR---HLMK-DPEKRF--CE--QALQ--HPWI---  
PFI1175w ---IWKRADPPNDRTF(2)---FLKYNLNIWVQLAKQW---PKGLK---DITN---KLSL-ESRMTD--LN--ELTE--HPWIN---  
PFB0150c ---KRNQSFENY---IKTIINSSPKINITEGY---SKHLC---YFVE---KCLQK-KPENRGN--VK--DLIN--HKFL---  
PFI1885c pk2 ---RGNVKE---IFKKNMRCHISFNTKHW---LNKSEVVK---EITL---WMCK-NPDDRCT--AL--QALG--HWF---  
PBANKA\_092520 cdpk7 ---PINKNT---EMNIQKTYVLSFRDNIW---KTISSAK---DLIS---KLEL-NADKRIS--AS--EALN--HIWI---  
prkaca ---FADQPT---QIYEKIVSGKVRFPSPHF---SSDLK---DLIR---NLQV-DLTKRFG(5)VN--DINK--HKWF---  
PFI0095C ---LWECSDPLTKNY(2)---FEKNMSLDTFRVTKSW---PEDIK---IMTK---NLID-KYRKNIK--LK--NLK--HPWFK---  
PFI3\_0211 cdpk5 ---NGKNND---ILKVEKGEFVFDNSYW---ARVSDAK---DLIC---QCLNY-NYKRID--VE--QVLK--HRWF---  
PFE1290w nek-2 ---KSNNSNM(2)---VAQKICEDEPDLPSDF---SKDLI---NLGY---WMLK-DWDRPT--IV--DIIS--TDYI---  
PBANKA\_040940 ---RSSVEKDIYWNML---VHKNYRELLTDKNGIHL---SNDV---DLIF---HCLDP-NFQTRYS--IN--QVLS--HTWF---  
nek1 ---EAGSMKNL---VLKIIISGFPVPSLHY---SYDLR---SLVS---QLFK-NPRDRPS--VN--SILE--KGF---  
nek7 ---YGDKNLYS---LCKIEQCYDPPPLSDH---YSEELR---QLVN---MCLNF-DPEKRF--VT--YVVD--VAKR---  
PBANKA\_093370 MAP-2 )IFNIIPTPTEDDL---KNINKPEVIKYLFPFR(8)YPSISDDGI---NLE---SMURF-NPNKRIT--ID--QALD--HPYL---  
PFI0040C ---MNTSFPSESVMF(2)---FLENMNLSCYPTKSW---PSDFK---FIVK---ELMNE-ECRKLIN--LK--NLMT--HPWFNE---  
PFI0\_0160 ---LWKSDDIEQDIDF(2)---VSECDMDIDVPELRTW---PYELK---KIQ(8)NKLQ-T-EGRKNLN--LN--ELCA--HPWFS---  
PBANKA\_135150 cdpk5 ---NGKNND---ILKVKKGEFVFDNSYW---SKISLDAK---ELIC---ECLNY-NYKRID--VH--KIVN--HKWF---  
PBANKA\_145320 pk2 ---RGNVKE---IFKKNMRCHISFNTKHW---LTKSENVK---EITL---WMCK-NPDDRCT--AI--QALG--HPWF---  
PBANKA\_090110 ---QFNYLEKCSKEL---VNMKMRGLSPKINQHI---SKITL---NYTE---YLNLF-DHECRPS--IE--EALS--YPIF---  
PFI2280w gak ---QNNN---FLSINASFTPYCTKY---SKRII---SILL---MTLNK-NPQKRID--TS--TLFF--IL---  
MAL7P1.18 ---LFDIISIRKWEHF(2)---NKNRNILIPFSFLFHN(1)---CSYFI---KLM---TYLI-MNNIYFS--KN--SYLL--DNKF(4)---  
PBANKA\_020580 eik2 ---IKTETNMERTQT---LCNARERILPDLIKKH---PNVA---SLCK---KMLSL-DYKSRPT-----SAQL--YNKI---  
PFI1\_0227 ---DGSTEW---FIYNKIKRRELKYPISII---PELTI---DLIE---KLTIM-NPEERIG(4)CE--EILE--HLVF---  
PFI0260 ---GSTNEERENV---IMNRIQDYHWSQLFSEK(5)IDKLSPEFK---DFLN---LCLDK-NPKKRPT--AE--SLIQ--HPFI---  
PBANKA\_141360 pk9 ---IDVGKDIKYFEQSTLKY---SNDISDDLK---DLIS---LMLNY-DPNKRPI--IV--EILN--HRWF---  
PFI1145c tk15 ---YNLTKNVK---IRHELLVKNKTPHINPF---LPNSIK---KLIQ---KCFSE-QPEDRPT--AY--EM--YKSL---  
PFI1\_0510 ---WLIANIEEDLNF(2)---IFEADMNFDFKFIKAW---PKEFK---KIQ---QLLHM-TSRKNLS--LK--ELSK--NPWKE---  
PFI1\_0220 tk12 )VFDYLVNHLNMSD---YKSIYSILDYVNFDFP---LVEKLT---KLSF---LCLNF-NIKNRP--SKLV--NLIL---  
rock1 ---YADSLVGTYS---KMNHNKNSLTFPPDNDI---SKEAK---NLIC---AFIT---DREVLGRNGVE--EIKR--HLFF---  
src ---PGMVRN---VLDQVERGYRMPCEPEC---PESLH---DLMC---QWRK-EPEERPT-----FEYL--QAFI---  
PFC0060C ---LMSRSDPEQDHVF(2)---LSQADMNFNMLERTKWK---PDDFK---FIK---KLLHM-EHRRNLD--LK--DLCK--HPWFTS---  
PBANKA\_122500 FIKK ---KCSDDLQDEDF---FVFKCDMMFDFKELTRKW---PSELK---SILK---GLLHA-ETRKLIN--LK--DMIM--HPWV---  
pak1 ---LNENFLRAL---YLIATNGTPELQNPKEK---SAIFR---DFLN---RCLDM-DVEKRG--AK--ELIQ--HOFI---  
PFI4\_0431 lammer )MMESIQPIPKMLYEATKTNGSKYVKNDELKLAW(21)IHKHELF---DFLY---SLQI-DPTLRPS--PA--EALK--HKFL---  
PFI4\_0408 )IFTKHGLIILKKE(13)---QLNQEDDEEIVFNSNDF(40)YPSDNLK(11)DFLS---SLQI-DPSKRCN--AM--EALK--HPWL---  
PFI2250c pkb ---NNTNRNV---LFESIKYQKLNYPKNI---SPRAV---DLIT---KLFK-NPKRIG(5)AQ--EIKK--HPFF---  
egfr ---DGIPASE---ISSILEKGERLPQPIC---TIDVY---MIMV---KCMWI-DADSRPK--FR--ELII--EF---  
PFI0740w crk-3 )IVNKLGFNERDI(13)---LNPHPNNHNNINHNK(11)PGVGLGL---DLIK---KPLK-NPYERIT--AS--DALN--HPWF---  
MAL7P1.73 ---NT---SSEAK---DFIQ---SLQI-NPEKRLN--VI--EATE--HPCI---  
PBANKA\_121280 mrk )IFLLGTPTNENNW---PEAKHLPLTDFPKSNK(6)IKIEDDCI---DLIT---SLKLN-NSHERIT--AE--EALK--HRYF---  
map2k1 )MFGCQVEGDAAET(13)---YGMDSRPFMAIFELLDY(11)GVFLEFQ---DFVN---KCLIK-NPAERAD--LK--QLVW--HAFI---  
PFI0865c crk-1 )ILCLGLDPKESY(15)---FKKKIKMNVNRRSHF(8)GLYLSDNL---DLIQ---KMLHY-NPQKRIS--AQ--EALN--HPYF---  
PFI4\_0733 ---LWDCSDPSKDEIF(2)---INECEMDLKDCLTDNW---PEGLK---AMK(22)RLNF-ESRKEIN--LK--DITV--DPWST---  
PFI0100c ---LWGNFDMQSNF(2)---FVNSDMNDFLFPPTREW---PEGLK---YIIR---KLDY-ESRSLD--LN--ELIE--HPWST---  
PBANKA\_135260 )FVWSQTPDRMLSL(51)NKYNSLISLSPSPVCPNW(40)NCCDEQF(20)DLR---RLDF-DYNTNIT--SE--EALK--HAWF---  
PBANKA\_130840 eik1 ---STSMERSI---VLSNLLKCIYSPESIRS---DNKIF---QFLL---SLLEI-DPQNRIS--AY--SLH--ENFF---  
PFI1\_0096 ck2 )IAKVLGTEDLHAY(5)IKLPHYLNILGEYERKFW(8)MDIAKDEVI---DLID---KMLTY-DPAKRIT--PK--EAME--HPYF---  
PBANKA\_131370 ---TGKNANEL---YNNILKANIPPELLSKEK---SLNIQGLK---NLE---NLIVH-DPEKRF--CS--DILN--HRWI---  
Consensus/80% .....b.....b.....s.h.....pb1.....hlp.p.ppr.s.....phb.....p.bb.....

Tewari et al., Fig. S1B

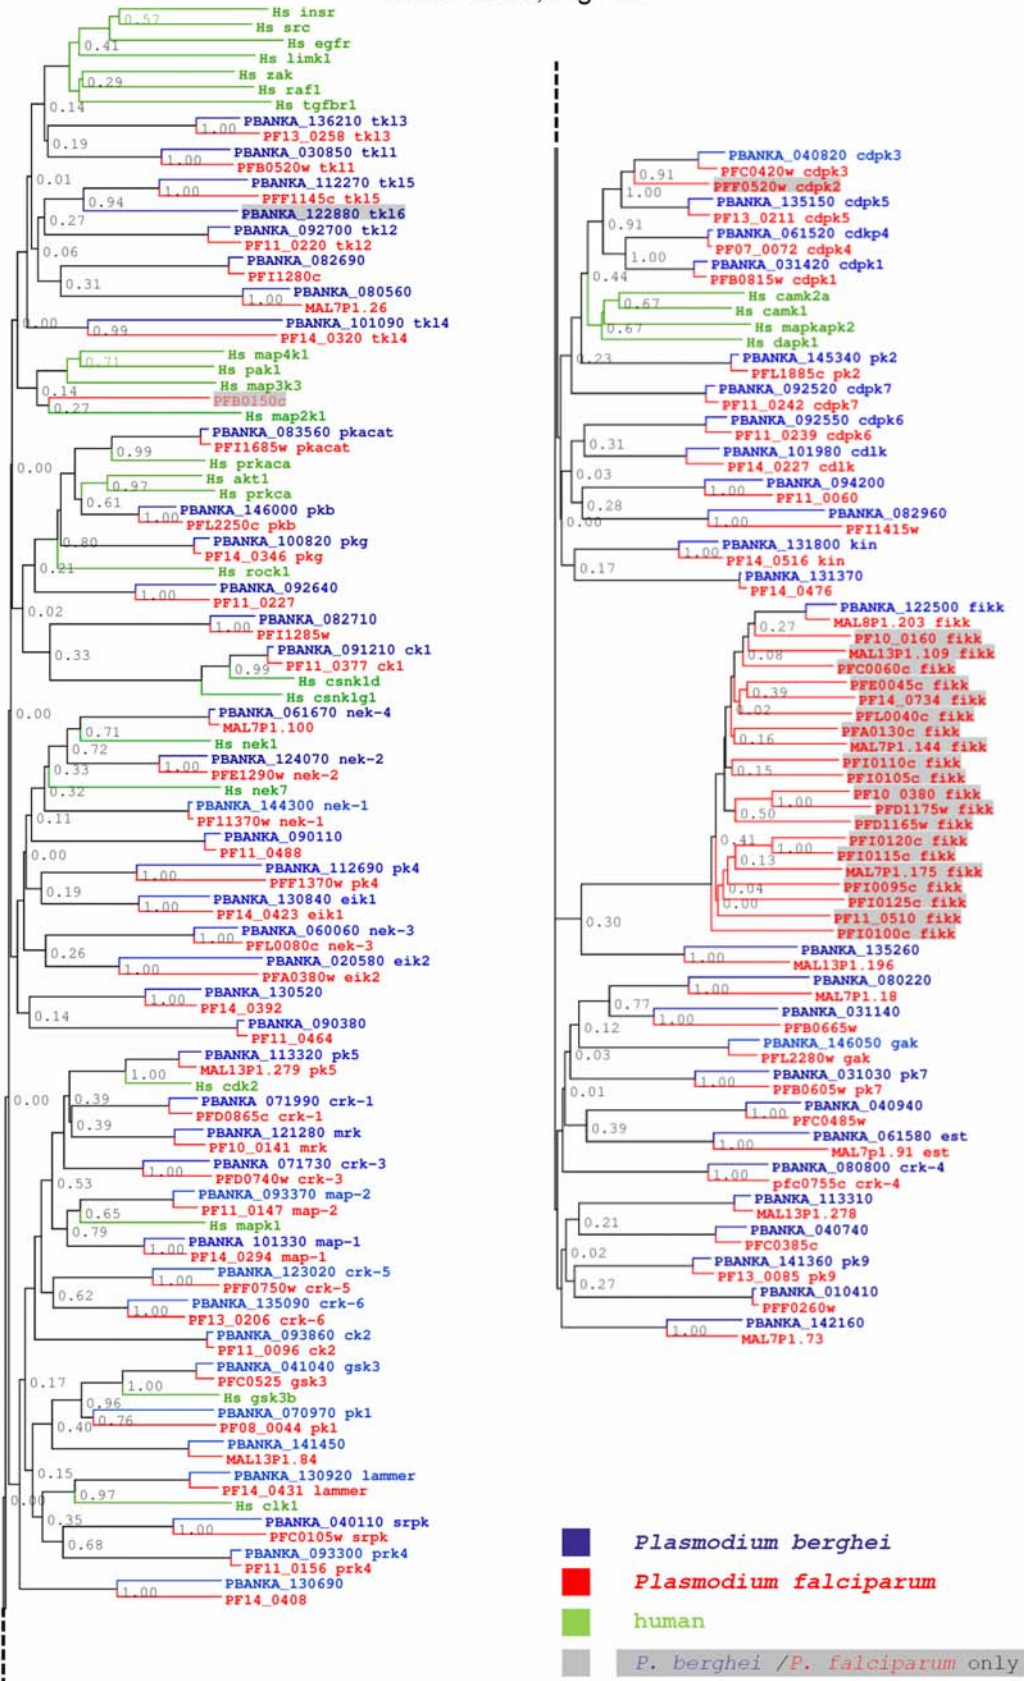

**Figure S1 (relates to Figure 1). Comparative Analysis of Kinase Domain Sequences from *P. berghei* and *P. falciparum***

(A) Multiple sequence alignment of *Plasmodium* kinase domains. The alignment was generated using the MUSCLE software (Edgar, 2004) and coloured using the CHROMA software to highlight conserved residues (Goodstadt and Ponting, 2001). Kinase domain sequences for *P. falciparum* were taken from Ward et al., (2004), those from *P. berghei* are contained in a supplemental text file entitled “Pb kinase domain sequences”.

(B) Evolutionary relationships of *Plasmodium* and selected human kinase domains. The evolutionary history was inferred from the alignment in Figure S1 using the Neighbor-Joining method (Saitou and Nei, 1987). The optimal tree with the sum of branch length = 72.77107574 is shown. The percentage of replicate trees in which the associated taxa clustered together in the bootstrap test (500 replicates) are shown next to the branches (Felsenstein, 1985). The tree is drawn to scale, with branch lengths in the same units as those of the evolutionary distances used to infer the phylogenetic tree. The evolutionary distances were computed using the Poisson correction method (Zuckerkandl and Pauling, 1965) and are in the units of the number of amino acid substitutions per site. All positions containing alignment gaps and missing data were eliminated only in pairwise sequence comparisons (Pairwise deletion option). There were a total of 4009 positions in the final dataset. Phylogenetic analyses were conducted in MEGA4 (Tamura et al., 2007).



Tewari et al., Figure S2 A (top)

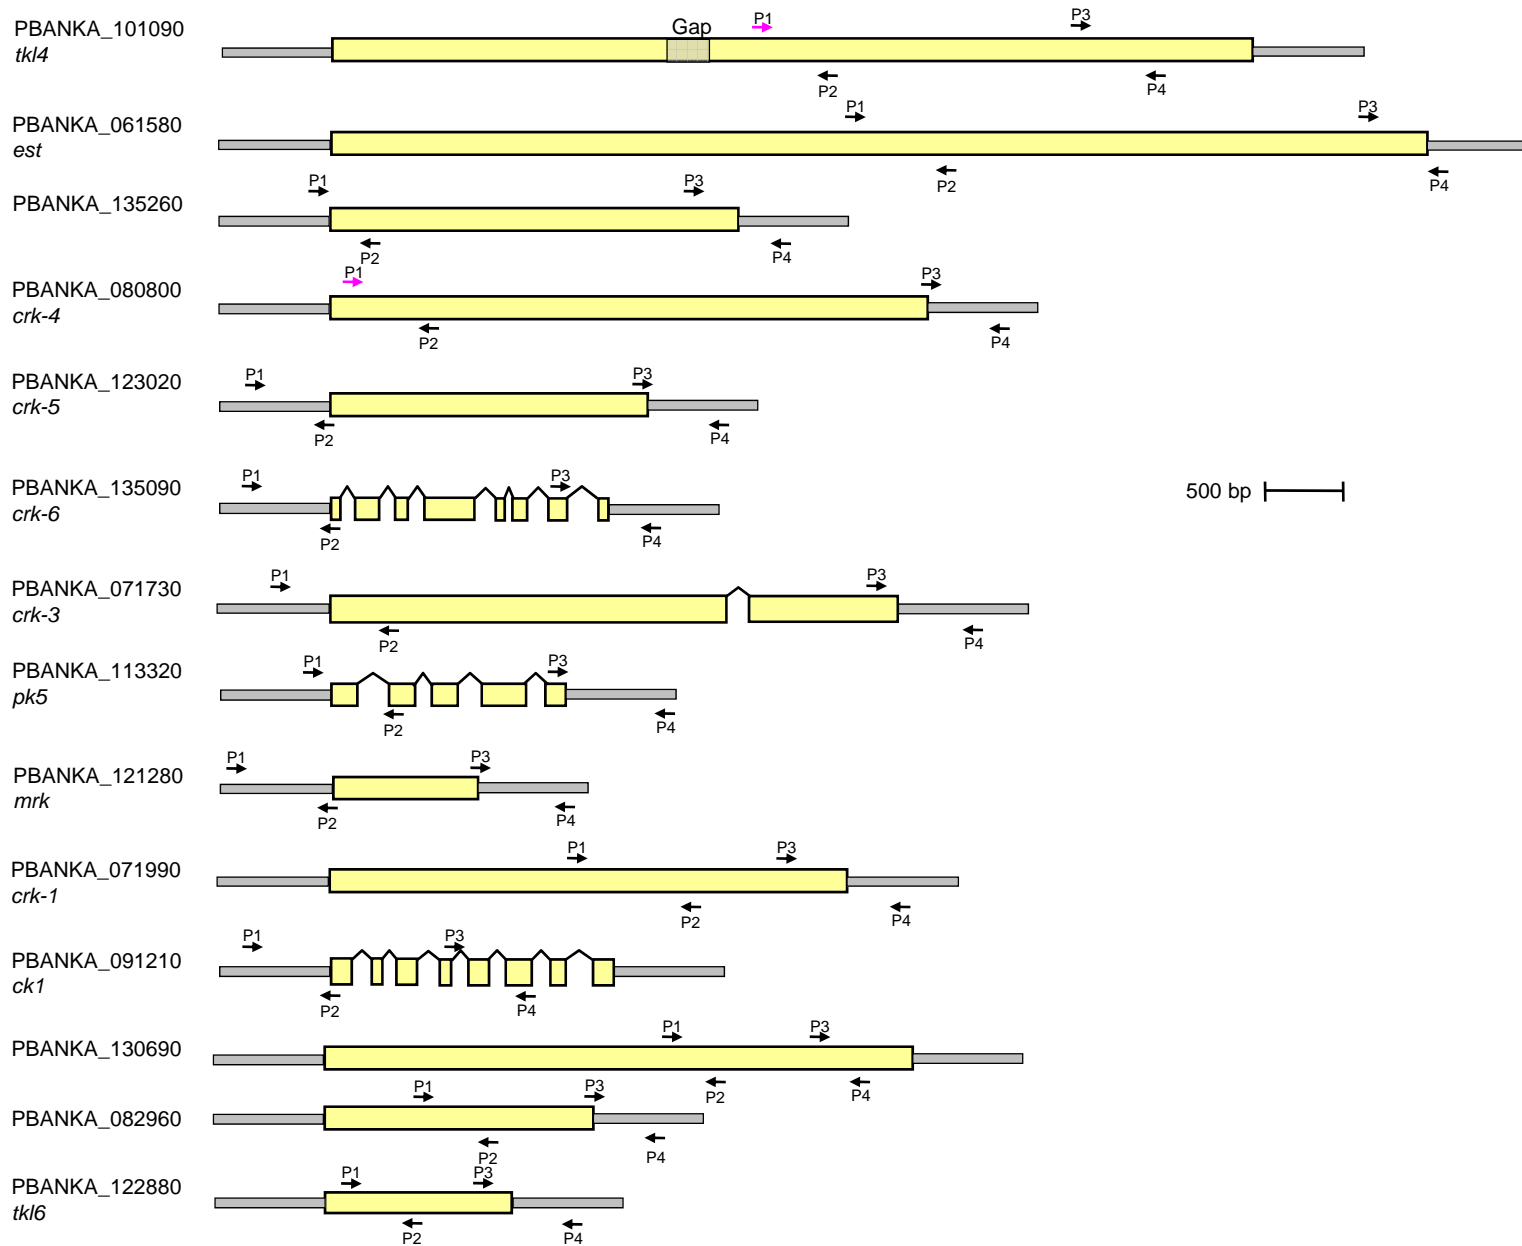

Tewari et al., Figure S2 A (cont.)

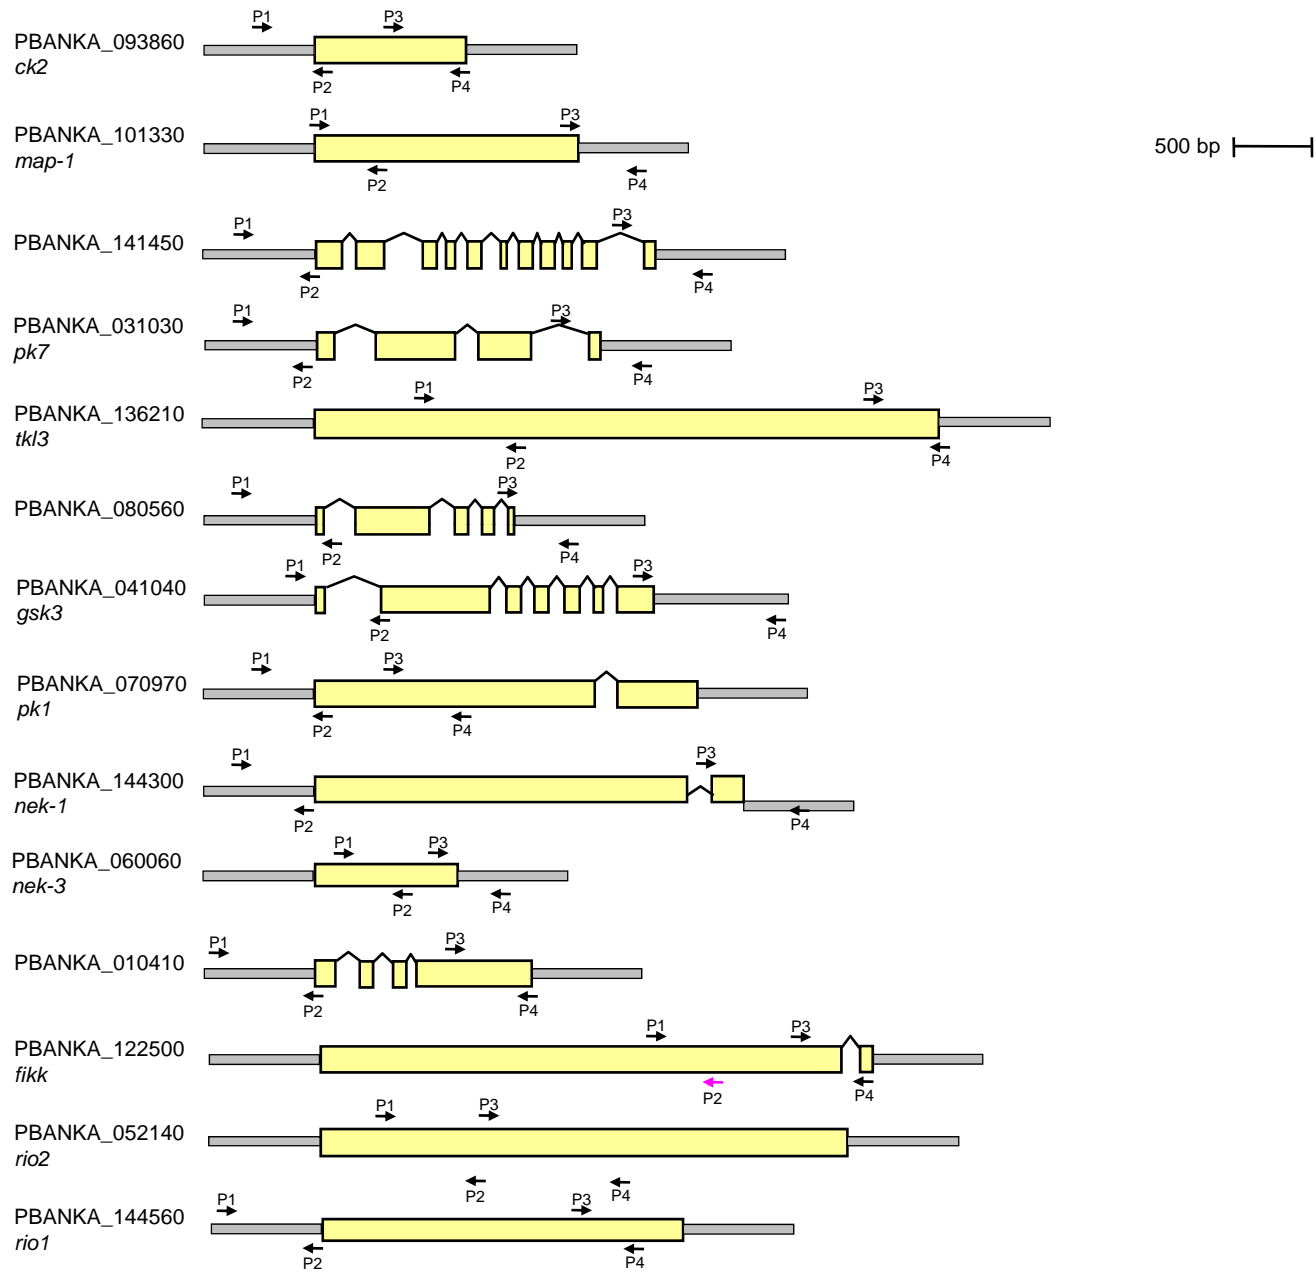

Tewari et al., Figure S2 A (cont.)

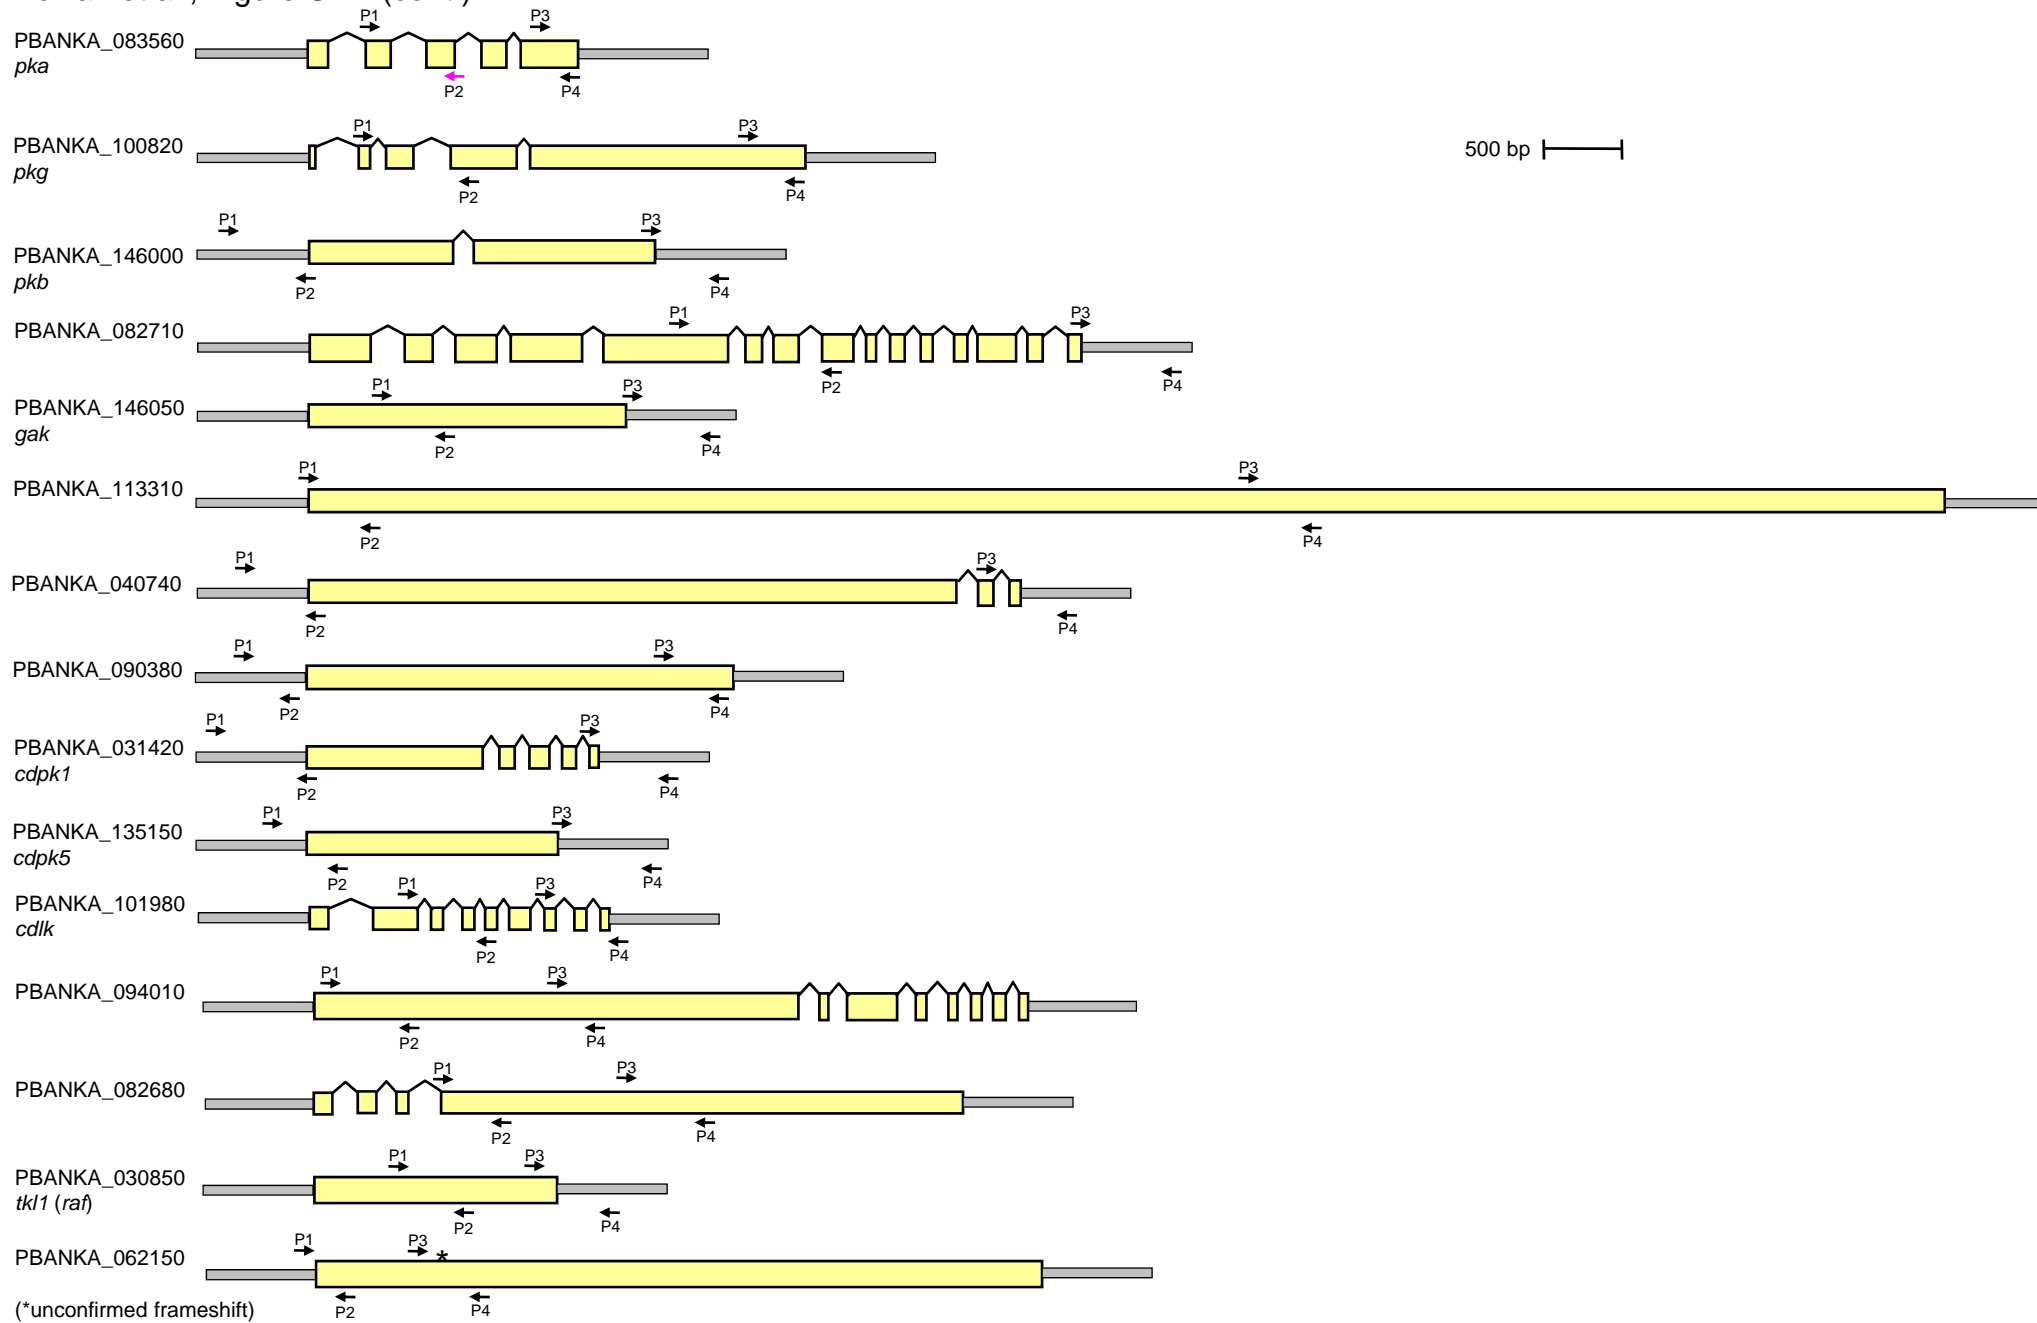



Tewari et al., Figure S2 A (cont.)

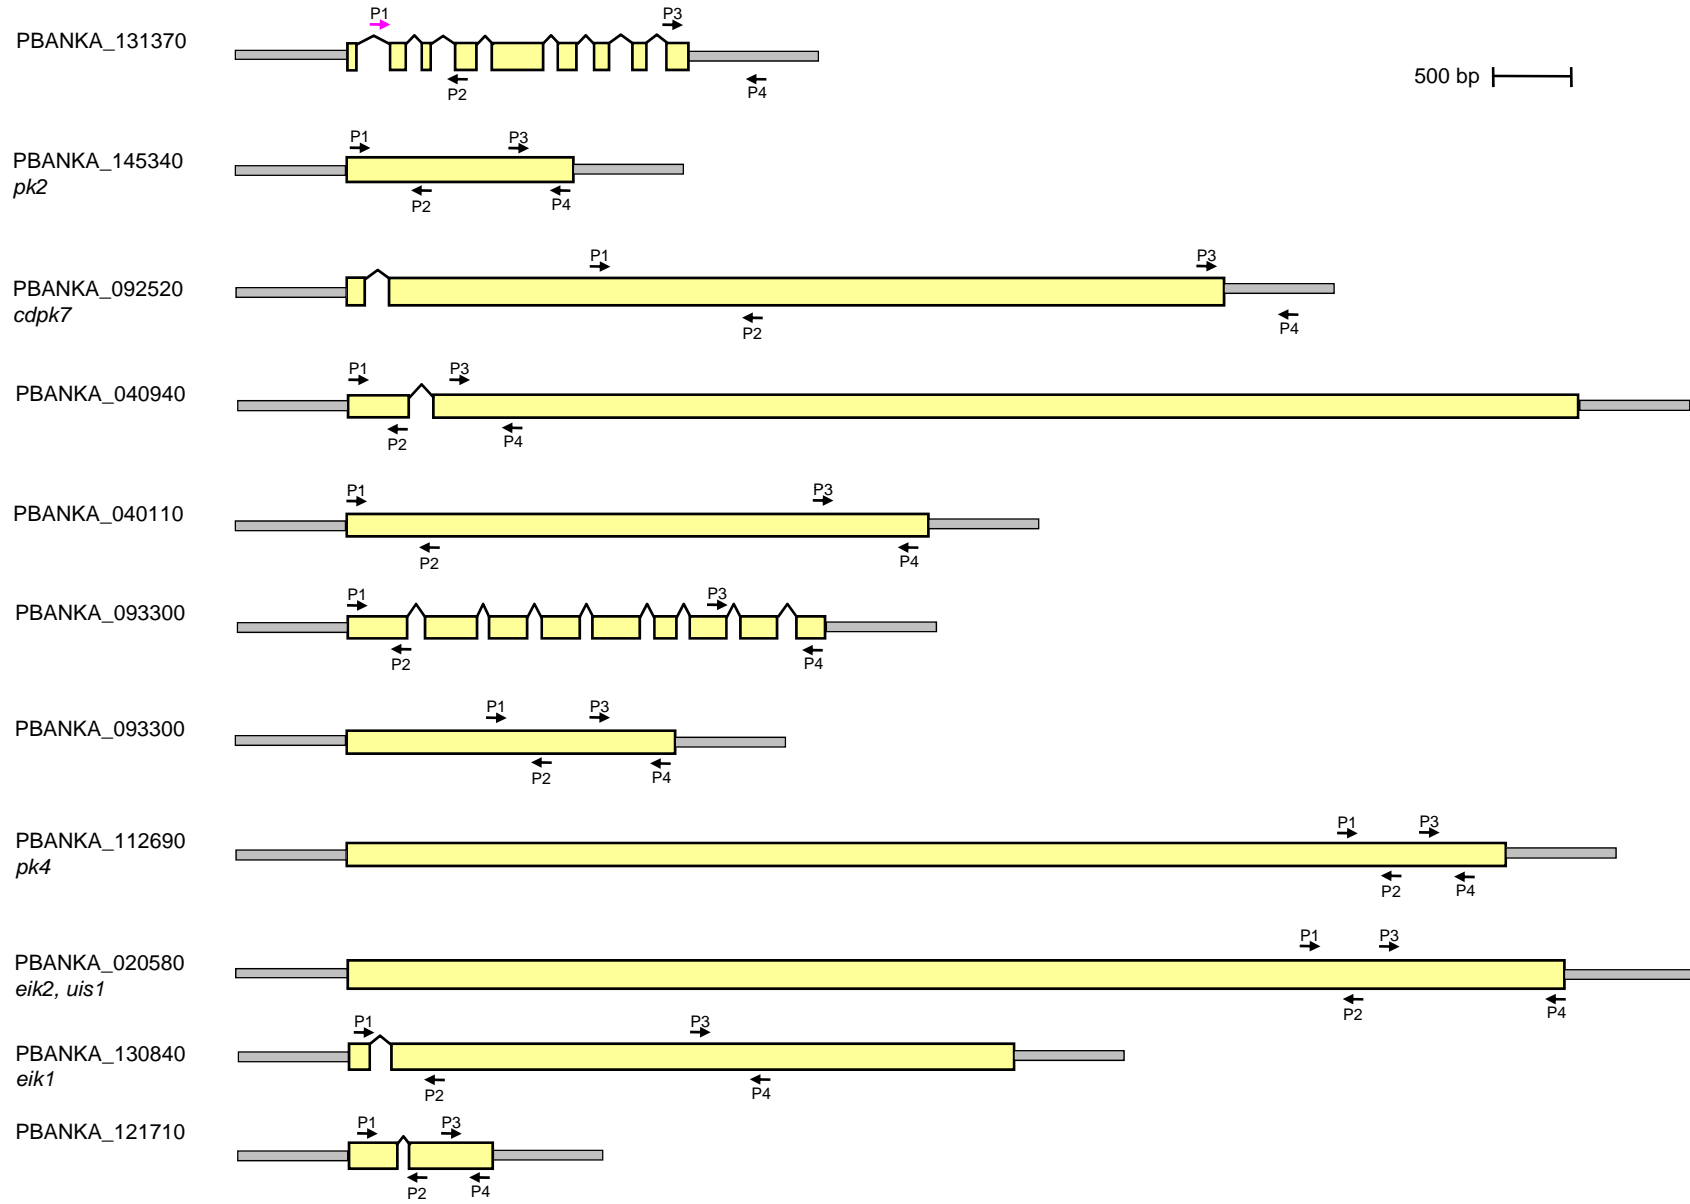

Tewari et al., Figure S2 A (cont.)

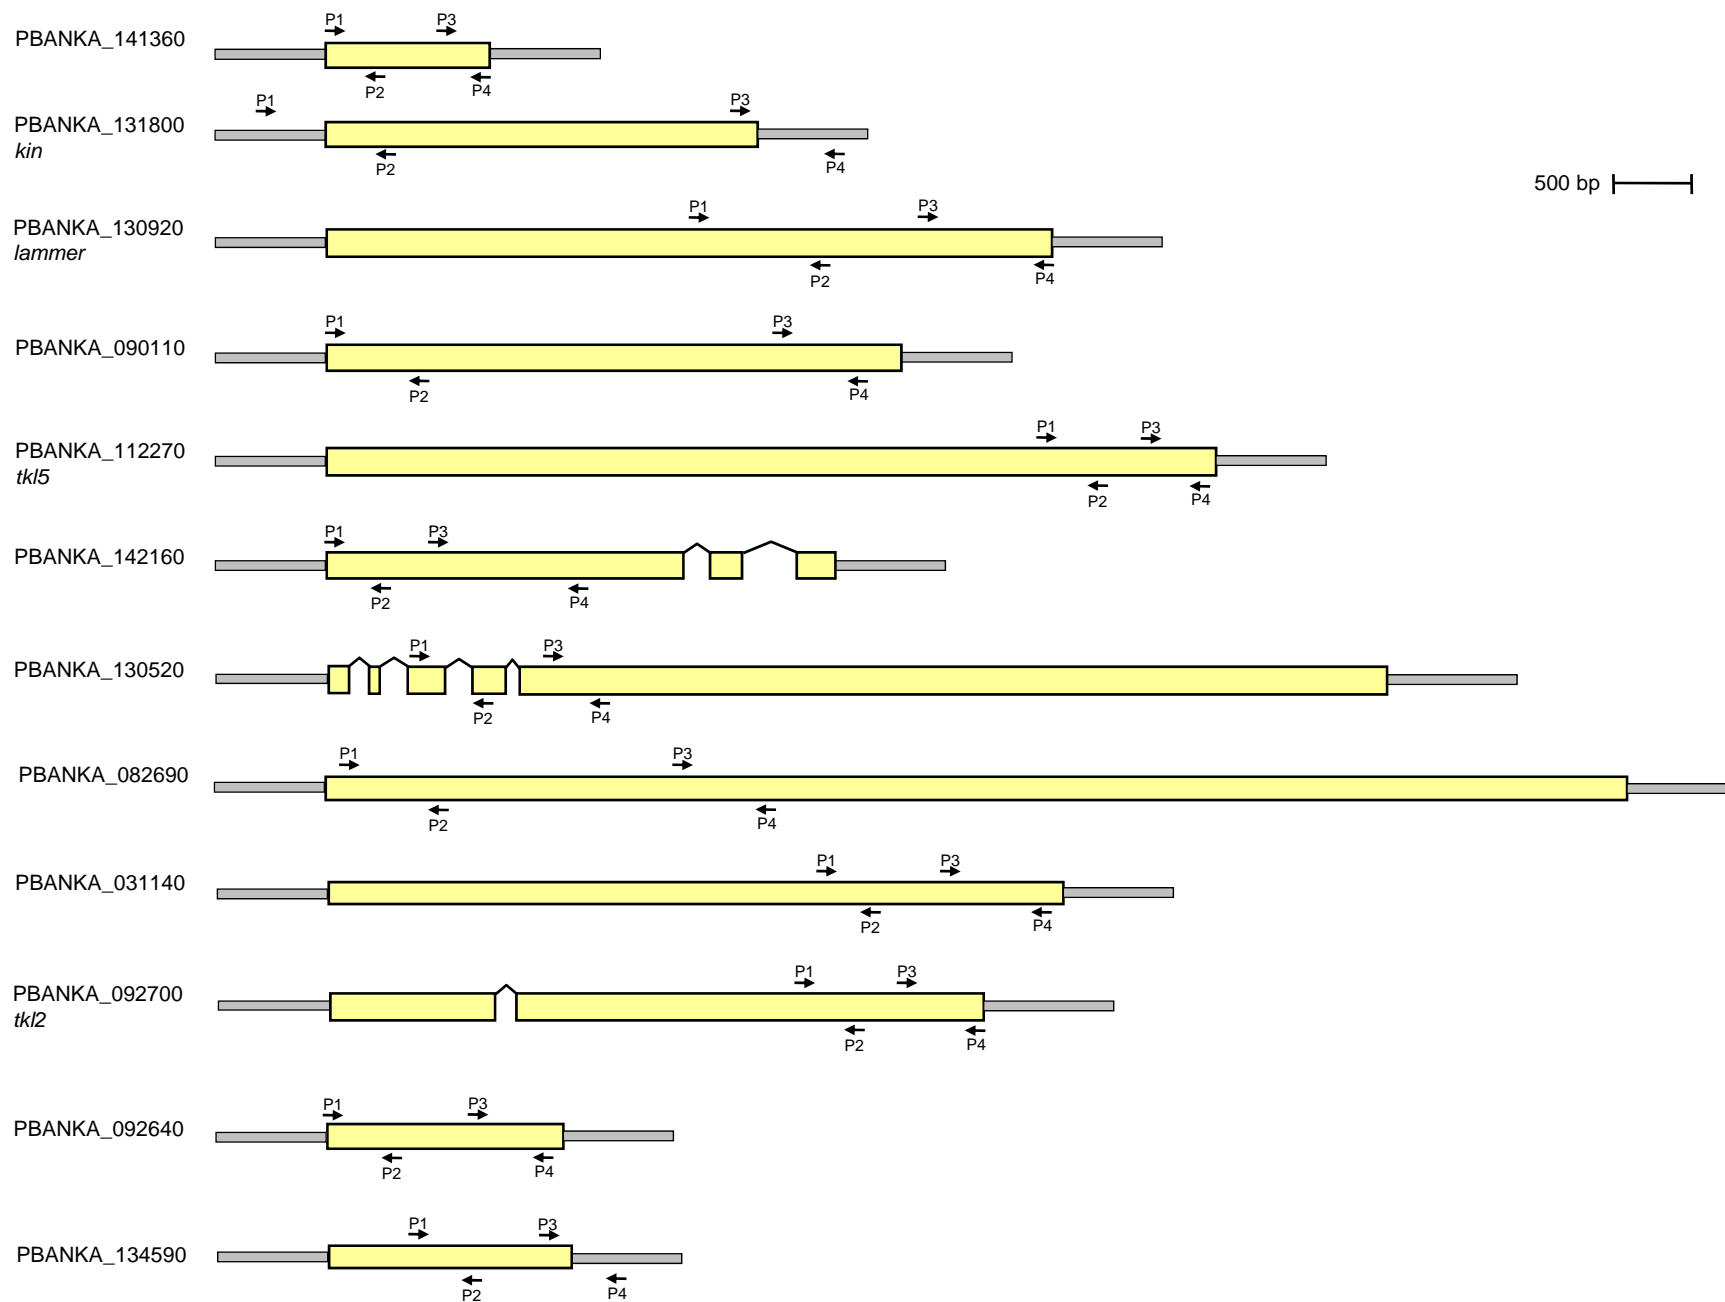

Tewari et al., Figure S2B

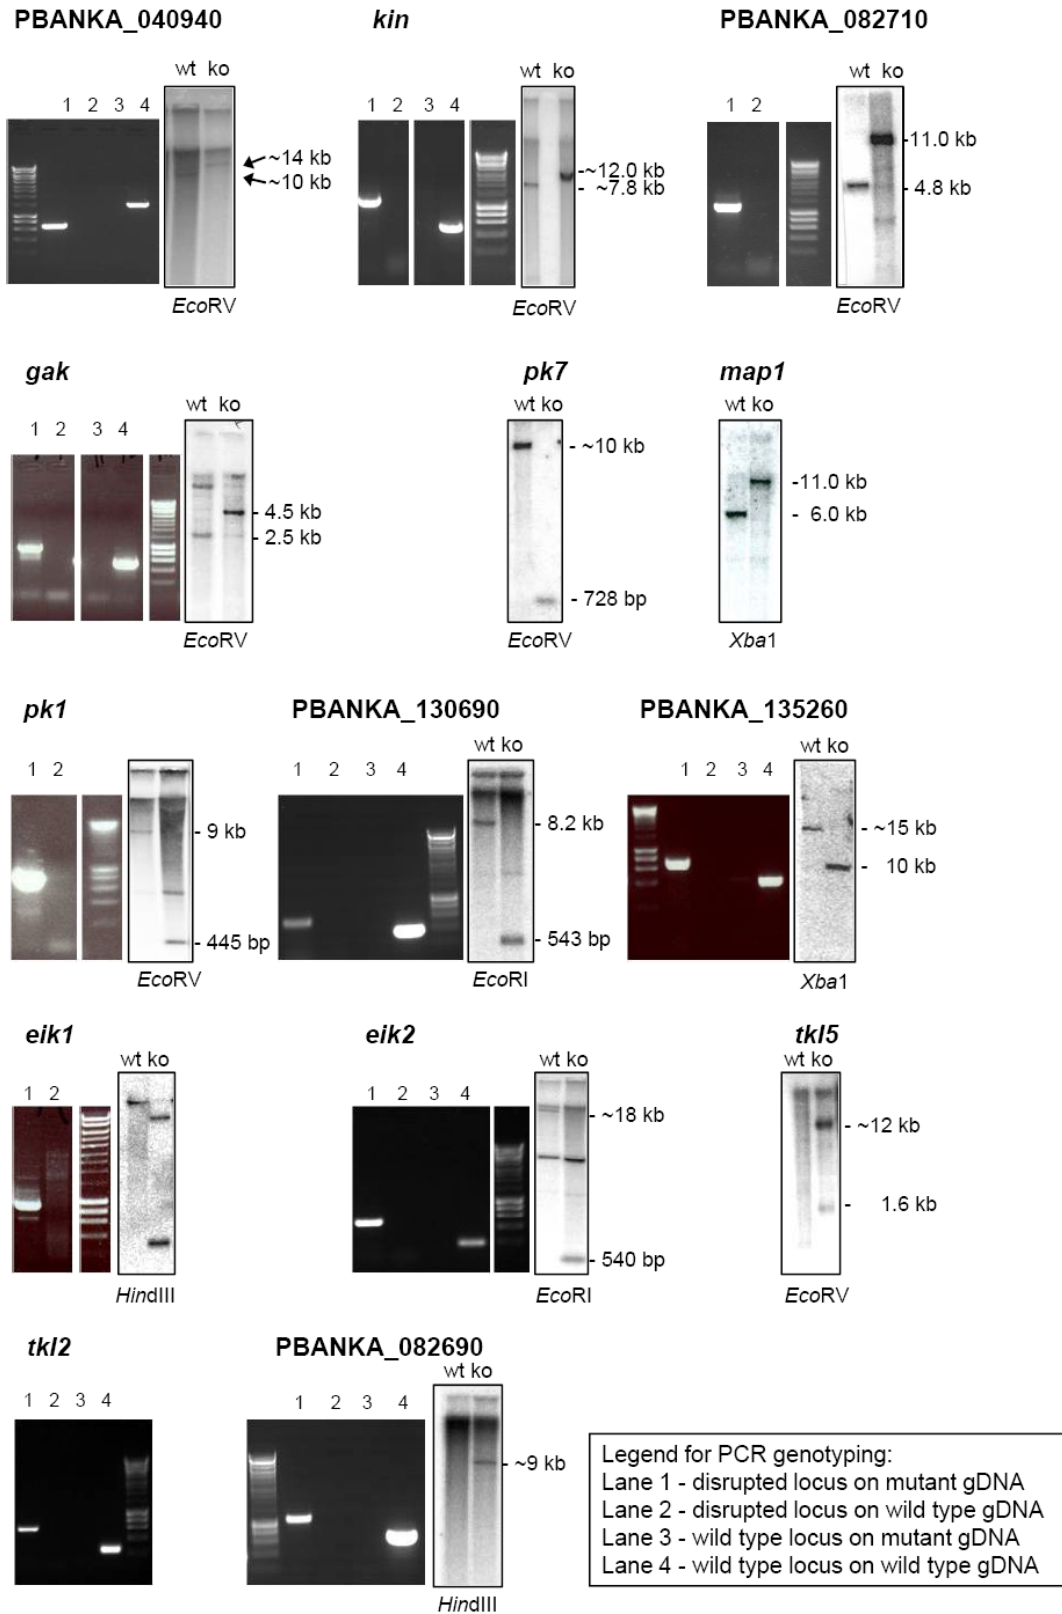



**Figure S2 (relates to Figure 2). Vector Designs and Genotyping Data**

(A) Description of gene targeting vectors. Gene models are shown as predicted in the May 2010 assembly of the *P. berghei* ANKA genome and have not been verified experimentally.

(B) PCR and Southern hybridisations confirming the disruption of 14 ePK genes. PCR genotyping (on the left) used the same rationale as illustrated in Figure 2. Southern blots (on the right) were routinely probed with gene-specific probes flanking the integration site. Diagnostic bands confirming correct integration are indicated by arrows. In a few cases evidence from only one method of genotyping was obtained. Additional details are available from the authors on request.

**Table S1 (relates to Fig.1): List of all *P. berghei* kinase-like genes and their *P. falciparum* orthologs.** Gatekeeper residues are taken from the multiple sequence alignment in Fig. S1, or from a manual alignment where indicated. Also shown are the total number of knock out attempts and how many of these led to deletion of the target as confirmed by genotype analysis. "p" gives an estimate for the likelihood of error for "possibly essential" genes. It is calculated from the average technical failure rate (0.248 per attempt for redundant genes in this study) to the power of n, where n is the total number deletion attempts for the gene. \* = genes for which no mutant clones were obtained despite positive genotyping

| Gene name         | <i>P. berghei</i> ID | <i>P. falciparum</i> ortholog | Group      | Gatekeeper      | Total | Successful | Outcome             | p                  |                    |
|-------------------|----------------------|-------------------------------|------------|-----------------|-------|------------|---------------------|--------------------|--------------------|
|                   |                      |                               |            |                 |       |            |                     |                    | Knock out attempts |
| <i>cdpk1</i>      | PBANKA_031420        | PFB0815w                      | CaMK       | T               | 6     | 0          | Possibly essential  | 0.00024            |                    |
| <i>cdpk2</i>      | no ortholog          | PFF0520w                      | CaMK       |                 |       |            | n/a                 |                    |                    |
| <i>cdpk3</i>      | PBANKA_040820        | PFC0420w                      | CaMK       | M               | 4     | 3          | KO confirmed        |                    |                    |
| <i>cdpk4</i>      | PBANKA_061520        | PF07_0072                     | CaMK       | S               | 7     | 7          | KO confirmed        |                    |                    |
| <i>cdpk5</i>      | PBANKA_135150        | PF13_0211                     | CaMK       | L               | 6     | 0          | Possibly essential  | 0.00024            |                    |
| <i>cdpk6</i>      | PBANKA_092550        | PF11_0239                     | CaMK       | M               | 16    | 12         | KO confirmed        |                    |                    |
| <i>cdpk7</i>      | PBANKA_092520        | PF11_0242                     | CaMK       | M               | 5     | 0          | Possibly essential* | 0.00095            |                    |
| <i>cdlk</i>       | PBANKA_101980        | PF14_0227                     | CaMK       | L               | 11    | 8          | KO confirmed        |                    |                    |
| <i>pk2</i>        | PBANKA_145340        | PFL1885c                      | CaMK       | L               | 4     | 0          | Possibly essential  | 0.00382            |                    |
|                   | PBANKA_040940        | PFC0485w                      | CaMK       | M               | 5     | 3          | KO confirmed        |                    |                    |
|                   | PBANKA_094200        | PF11_0060                     | CaMK       | M               |       |            | Not done            |                    |                    |
|                   | PBANKA_082960        | PFI1415w                      | CaMK       | ?               | 5     | 0          | Possibly essential  | 0.00095            |                    |
|                   | PBANKA_031140        | PFB0665w                      | CaMK       | M               | 5     | 0          | Possibly essential  | 0.00095            |                    |
|                   | PBANKA_080220        | MAL7P1.18                     | CaMK       | M               |       |            | Not done            |                    |                    |
|                   | <i>kin</i>           | PBANKA_131800                 | PF14_0516  | CaMK, Snf1-like | L     | 4          | 3                   | KO confirmed       | 0.00382            |
|                   |                      | PBANKA_131370                 | PF14_0476  | CaMK, Snf1-like | L     | 4          | 0                   | Possibly essential | 0.00382            |
|                   |                      | PBANKA_141360                 | PF13_0085  | CaMK, Snf1-like | M     | 9          | 0                   | Possibly essential | 3.6E-06            |
|                   | <i>pka</i>           | PBANKA_083560                 | PFI1685w   | AGC             | L     | 3          | 0                   | Possibly essential | 0.01535            |
| <i>pkg</i>        | PBANKA_100820        | PF14_0346                     | AGC        | T               | 3     | 0          | Possibly essential  | 0.01535            |                    |
| <i>pkb</i>        | PBANKA_146000        | PFL2250c                      | AGC        | L               | 6     | 0          | Possibly essential  | 0.00024            |                    |
|                   | PBANKA_092640        | PF11_0227                     | AGC        | M               | 8     | 0          | Possibly essential  | 1.5E-05            |                    |
|                   | PBANKA_040740        | PFC0385c                      | AGC        | L               | 3     | 0          | Possibly essential  | 0.01535            |                    |
|                   | PBANKA_082710        | PFI1285w                      | AGC        | L               | 3     | 3          | KO confirmed        |                    |                    |
|                   | PBANKA_113310        | MAL13P1.278                   | orphan     | L               | 4     | 0          | Possibly essential  | 0.00382            |                    |
|                   | PBANKA_090380        | PF11_0464                     | orphan     | Q               | 5     | 0          | Possibly essential  | 0.00095            |                    |
|                   | PBANKA_010410        | PFF0260w                      | orphan     | M               | 8     | 0          | Possibly essential  | 1.5E-05            |                    |
|                   | <i>gak</i>           | PBANKA_146050                 | PFL2280w   | GAK             | M     | 4          | 3                   | KO confirmed       |                    |
|                   | <i>pk7</i>           | PBANKA_031030                 | PFB0605w   | orphan          | N     | 9          | 5                   | KO confirmed       |                    |
|                   | <i>est</i>           | PBANKA_061580                 | MAL7P1.91  | orphan          | I (ma | 4          | 0                   | Possibly essential | 0.00382            |
| <i>ck1</i>        | PBANKA_091210        | PF11_0377                     | CK1        | L               | 4     | 0          | Possibly essential  | 0.00382            |                    |
| <i>pk5</i>        | PBANKA_113320        | MAL13P1.279                   | CMGC, CRK  | F               | 2     | 2          | KO confirmed        |                    |                    |
| <i>mrk</i>        | PBANKA_121280        | PF10_0141                     | CMGC, CRK  | M               | 6     | 0          | Possibly essential  | 0.00024            |                    |
| <i>crk-1</i>      | PBANKA_071990        | PFD0865c                      | CMGC, CRK  | M               | 3     | 0          | Possibly essential  | 0.01535            |                    |
| <i>crk-3</i>      | PBANKA_071730        | PFD0740w                      | CMGC, CRK  | F               | 4     | 0          | Possibly essential  | 0.00382            |                    |
| <i>crk-5</i>      | PBANKA_123020        | PFF0750w                      | CMGC, CRK  | Y               | 5     | 0          | Possibly essential  | 0.00095            |                    |
| <i>crk-6; PK6</i> | PBANKA_135090        | MAL13P1.185                   | CMGC, CRK  | F               | 6     | 0          | Possibly essential  | 0.00024            |                    |
| <i>map-1</i>      | PBANKA_101330        | PF14_0294                     | CMGC, MAPK | F               | 2     | 2          | KO confirmed        |                    |                    |
| <i>map-2</i>      | PBANKA_093370        | PF11_0147                     | CMGC, MAPK | L               | 4     | 3          | KO confirmed        |                    |                    |
| <i>ck2</i>        | PBANKA_093860        | PF11_0096                     | GMGC, CK2  | F               | 4     | 0          | Possibly essential  | 0.00382            |                    |
| <i>gsk-3</i>      | PBANKA_041040        | PFC0525c                      | CMGC, GSK3 | M               | 9     | 0          | Possibly essential  | 3.6E-06            |                    |
| <i>pk1</i>        | PBANKA_070970        | PF08_0044                     | CMGC, GSK3 | M (ma           | 4     | 3          | KO confirmed        |                    |                    |
|                   | PBANKA_141450        | MAL13P1.84                    | CMGC, GSK3 | F               | 5     | 0          | Possibly essential  | 0.00095            |                    |
| <i>lammer</i>     | PBANKA_130920        | PF14_0431                     | CMGC, SRPK | F               | 3     | 0          | Possibly essential  | 0.01535            |                    |
| <i>srpk</i>       | PBANKA_040110        | PFC0105w                      | CMGC, SRPK | F               | 5     | 4          | KO confirmed        |                    |                    |
| <i>prk4</i>       | PBANKA_093300        | PF11_0156                     | CMGC, SRPK | F               | 4     | 0          | Possibly essential  | 0.00382            |                    |
| <i>crk-4</i>      | PBANKA_130690        | PF14_0408                     | CMGC, SRPK | T               | 3     | 3          | KO confirmed        |                    |                    |
|                   | PBANKA_080800        | PFC0755c                      | CMGC       | ? (po           | 4     | 0          | Possibly essential  | 0.00382            |                    |
|                   | no ortholog          | PFB0150c                      | CMGC       |                 |       |            | n/a                 |                    |                    |
| <i>nek-2</i>      | PBANKA_135260        | MAL13P1.196                   | CMGC       | F               | 2     | 2          | KO confirmed        |                    |                    |
|                   | PBANKA_124070        | PFE1290w                      | CMGC, NEK  | M               | 7     | 6          | KO confirmed        |                    |                    |

|                   |               |             |                 |      |   |   |                     |         |
|-------------------|---------------|-------------|-----------------|------|---|---|---------------------|---------|
| <i>nek-4</i>      | PBANKA_061670 | MAL7P1.100  | CMGC, NEK       | M    | 2 | 2 | KO confirmed        |         |
| <i>nek-1</i>      | PBANKA_144300 | PFL1370w    | CMGC, NEK       | M    | 8 | 0 | Possibly essential  | 1.5E-05 |
| <i>nek-3</i>      | PBANKA_060060 | PFL0080c    | CMGC, NEK       | I    | 7 | 0 | Possibly essential  | 5.9E-05 |
| <i>eik1</i>       | PBANKA_130840 | PF14_0423   | CMGC, ELK       | M    | 4 | 2 | KO confirmed        |         |
| <i>eik2; uis1</i> | PBANKA_020580 | PFA0380w    | CMGC, ELK       | M    | 5 | 3 | KO confirmed        |         |
| <i>pk4</i>        | PBANKA_112690 | PFF1370w    | CMGC, ELK       | M    | 3 | 0 | Possibly essential  | 0.01535 |
|                   | PBANKA_090110 | PF11_0488   | orphan          | M    | 9 | 0 | Possibly essential  | 3.6E-06 |
|                   | PBANKA_130520 | PF14_0392   | orphan          | M    | 6 | 0 | Possibly essential* | 0.00024 |
|                   | PBANKA_142160 | MAL7P1.73   | orphan          | L    | 3 | 0 | Possibly essential  | 0.01535 |
| <i>tkl6</i>       | PBANKA_122880 | no ortholog | TKL             | L    | 5 | 0 | Possibly essential  | 0.00095 |
| <i>tkl5</i>       | PBANKA_112270 | PFF1145c    | TKL             | L    | 3 | 3 | KO confirmed        |         |
| <i>tkl2</i>       | PBANKA_092700 | PF11_0220   | TKL             | Y    | 4 | 1 | KO confirmed        |         |
| <i>tkl1 (raf)</i> | PBANKA_030850 | PFB0520w    | TKL             | L    | 3 | 0 | Possibly essential  | 0.01535 |
| <i>tkl3</i>       | PBANKA_136210 | PF13_0258   | TKL             | L    | 5 | 0 | Possibly essential* | 0.00095 |
| <i>tkl4</i>       | PBANKA_101090 | PF14_0320   | TKL             | M    | 3 | 0 | Possibly essential  | 0.01535 |
|                   | PBANKA_082690 | PFI1280c    | orphan          | T    | 3 | 2 | KO confirmed        |         |
|                   | PBANKA_080560 | MAL7P1.26   | orphan          | F    | 5 | 0 | Possibly essential  | 0.00095 |
|                   | PBANKA_121710 | PFC0945w    | pseudokinase    | n.d. | 5 | 0 | Possibly essential  | 0.00095 |
|                   | PBANKA_094010 | PF11_0079   | pseudokinase    | n.d. | 4 | 0 | Possibly essential  | 0.00382 |
|                   | PBANKA_082680 | PFI1275w    | pseudokinase    | n.d. | 4 | 0 | Possibly essential  | 0.00382 |
|                   | PBANKA_134590 | PF13_0166   | pseudokinase    | n.d. | 3 | 0 | Possibly essential  | 0.01535 |
|                   | PBANKA_062150 | MAL7P1.127  | pseudokinase    | n.d. | 5 | 0 | Possibly essential  | 0.00095 |
| <i>rio1</i>       | PBANKA_144560 | PFL1490w    | aPK, RIO        |      | 3 | 0 | Possibly essential  | 0.01535 |
| <i>rio2</i>       | PBANKA_052140 | PFD0975w    | aPK, RIO        |      | 4 | 0 | Possibly essential  | 0.00382 |
| <i>fikk</i>       | PBANKA_122500 | MAL8P1.203  | FIKK, ancestral | S    | 5 | 0 | Possibly essential  | 0.00095 |
|                   | no ortholog   | MAL7P1.144  | FIKK            |      |   |   | n/a                 |         |
| <i>R45</i>        | no ortholog   | PFD1175w    | FIKK            |      |   |   | n/a                 |         |
|                   | no ortholog   | PFI0095c    | FIKK            |      |   |   | n/a                 |         |
|                   | no ortholog   | PFI0100c    | FIKK            |      |   |   | n/a                 |         |
|                   | no ortholog   | PFI0105c    | FIKK            |      |   |   | n/a                 |         |
|                   | no ortholog   | PFI0110c    | FIKK            |      |   |   | n/a                 |         |
|                   | no ortholog   | PFI0115c    | FIKK            |      |   |   | n/a                 |         |
|                   | no ortholog   | PFI0120c    | FIKK            |      |   |   | n/a                 |         |
|                   | no ortholog   | PFI0125c    | FIKK            |      |   |   | n/a                 |         |
|                   | no ortholog   | PFL0040c    | FIKK            |      |   |   | n/a                 |         |
|                   | no ortholog   | PFD1165w    | FIKK            |      |   |   | n/a                 |         |
|                   | no ortholog   | PFE0045c    | FIKK            |      |   |   | n/a                 |         |
|                   | no ortholog   | PFC0060c    | FIKK            |      |   |   | n/a                 |         |
|                   | no ortholog   | PF14_0734   | FIKK            |      |   |   | n/a                 |         |
|                   | no ortholog   | PFA0130c    | FIKK            |      |   |   | n/a                 |         |
|                   | no ortholog   | PF11_0510   | FIKK            |      |   |   | n/a                 |         |
|                   | no ortholog   | PF10_0160   | FIKK            |      |   |   | n/a                 |         |
|                   | no ortholog   | MAL7P1.175  | FIKK            |      |   |   | n/a                 |         |
|                   | no ortholog   | PF10_0380   | FIKK            |      |   |   | n/a                 |         |
|                   | no ortholog   | MAL13P1.109 | FIKK            |      |   |   | n/a                 |         |

sum: 0.23139



**Table S2. Unique ePKs of *P. berghei*/*P. falciparum* and Their Distribution across Other *Plasmodium* Genomes**

|                       | <i>P. berghei</i> | <i>P. yoelii</i>                 | <i>P. chabaudi</i> | <i>P. vivax</i>   | <i>P. knowlesi</i> | <i>P. falciparum</i><br>3D7 | <i>P. reichenowi</i>           | <i>P. gallinaceum</i>                                                    |
|-----------------------|-------------------|----------------------------------|--------------------|-------------------|--------------------|-----------------------------|--------------------------------|--------------------------------------------------------------------------|
| <i>tkl6</i>           | PBANKA_122880     | <u>PY04849</u><br><u>PY04848</u> | <u>PCAS_122950</u> | <u>PVX_093670</u> | <u>PKH_011700</u>  | —                           | —                              | Pgal0325e01.p1k<br>Pgal0616c03.p1k<br>Pgal0616c03.q1k<br>Pgal0489d11.p1k |
| PFB0150c              | —                 | —                                | —                  | <u>PVX_003590</u> | <u>PKH_041680</u>  | PFB0150c                    | 3502696.c000217971.<br>Contig1 | gal28a.d0000062<br>93. Contig1                                           |
| <i>cdpk2</i>          | —                 | —                                | —                  | —                 | —                  | PFF0520W                    | 3502696.c000218538.<br>Contig1 | gal28a.d0000019<br>39. Contig1                                           |
| Ancestral <i>fikk</i> | PBANKA_122500     | <u>PY03326</u>                   | <u>PCAS_122560</u> | <u>PVX_088265</u> | <u>PKH_011260</u>  | MAL8P1.203                  | 3502696.c000024654.<br>Contig1 | gal28a.d0000159<br>42. Contig1                                           |
| <i>fikk</i> expansion | none              | none                             | none               | none              | none               | 20                          | yes                            | none                                                                     |

**Table S3 (relates to Fig. 3). Data from phenotyping 23 mutants.** All data are given as percentage of wild type controls studied in parallel. SD = standard deviation. n = number of replicate experiments.

| Gene name         | <i>P. berghei</i> ID | Ookinete conversion |       |   | Oocyst numbers |       |   | Oocyst prevalence |       |   | Oocyst sporozoites |       |   | Salivary gland sporozoites |       |   | Transmission by mosquito bite |
|-------------------|----------------------|---------------------|-------|---|----------------|-------|---|-------------------|-------|---|--------------------|-------|---|----------------------------|-------|---|-------------------------------|
|                   |                      | % of control        | SD    | n | % of control   | SD    | n | % of control      | SD    | n | % of control       | SD    | n | % of control               | SD    | n |                               |
| <i>cdpk3</i>      | PBANKA_040820        | 94.65               | 6.97  | 3 | 3.30           | 2.79  | 8 | n.d.              |       |   | n.d.               |       |   | 0.00                       | 0.00  | 2 | n.d.                          |
| <i>cdpk4</i>      | PBANKA_061520        | 0.00                | 0.00  | 4 | 0.00           | 0.00  | 4 | 0.00              | 0.00  | 4 | n.d.               |       |   | 0.00                       | 0.00  | 4 | n.d.                          |
| <i>cdpk6</i>      | PBANKA_092550        | 90.41               | 11.70 | 3 | 91.20          | 11.94 | 3 | 98.35             | 5.79  | 3 | 152.22             | 19.18 | 3 | 28.35                      | 44.69 | 3 | transmitted (delayed)         |
| <i>cdlk</i>       | PBANKA_101980        | 84.90               | 7.63  | 6 | 104.66         | 17.48 | 3 | 102.79            | 13.03 | 3 | 41.66              | 18.50 | 3 | 4.16                       | 1.70  | 3 | transmitted                   |
|                   | PBANKA_040940        | 70.59               | 14.26 | 3 | 49.04          | 23.30 | 6 | 97.36             | 16.94 | 6 | 132.61             | 18.13 | 3 | 9.98                       | 2.11  | 6 | no transmission (0/3)         |
| <i>kin</i>        | PBANKA_131800        | 89.00               | 6.76  | 3 | 105.28         | 29.73 | 3 | 103.85            | 0.00  | 3 | 148.56             | 27.35 | 3 | 4.65                       | 1.03  | 3 | delayed to 15d                |
|                   | PBANKA_082710        | 97.11               | 7.82  | 2 | 91.58          | 2.23  | 2 | 95.56             | 6.29  | 2 | 52.93              | 0.27  | 2 | 51.24                      | 16.37 | 2 | transmitted                   |
| <i>gak</i>        | PBANKA_146050        | 4.62                | 1.54  | 3 | 3.28           | 3.60  | 6 | 47.98             | 32.20 | 6 | 0.00               | 0.00  | 3 | 0.00                       | 0.00  | 3 | n.d.                          |
| <i>pk7</i>        | PBANKA_031030        | 8.92                | 3.70  | 8 | 8.88           | 5.59  | 4 | 63.45             | 8.63  | 4 | 0.00               | 0.00  | 7 | 0.00                       | 0.00  | 3 | n.d.                          |
| <i>pk5</i>        | PBANKA_113320        | 87.37               | 14.24 | 3 | 56.43          | 2.28  | 3 | 94.44             | 9.62  | 3 | 107.63             | 18.95 | 3 | 65.27                      | 16.06 | 3 | transmitted                   |
| <i>map-1</i>      | PBANKA_101330        | 93.68               | 15.82 | 3 | 63.33          | 23.43 | 3 | 87.72             | 12.15 | 3 | 92.97              | 18.31 | 3 | 101.53                     | 23.25 | 3 | transmitted                   |
| <i>map-2</i>      | PBANKA_093370        | 0.00                | 0.00  | 3 | 0.00           | 0.00  | 3 | 0.00              | 0.00  | 3 | n.d.               |       |   | 0.00                       | 0.00  | 3 | n.d.                          |
| <i>pk1</i>        | PBANKA_070970        | 98.40               | 8.84  | 3 | 87.36          | 31.51 | 3 | 104.00            | 6.97  | 3 | 98.82              | 13.24 | 3 | 104.79                     | 25.44 | 3 | transmitted                   |
| <i>srpk</i>       | PBANKA_040110        | 0.00                | 0.00  | 3 | 0.00           | 0.00  | 3 | 0.00              | 0.00  | 3 | n.d.               |       |   | n.d.                       |       |   | n.d.                          |
|                   | PBANKA_130690        | 98.50               | 9.17  | 3 | 106.15         | 15.51 | 3 | 100.00            | 6.66  | 3 | 128.00             | 45.67 | 3 | 124.94                     | 16.37 | 3 | transmitted                   |
|                   | PBANKA_135260        | 95.79               | 10.15 | 3 | 57.46          | 9.47  | 3 | 103.70            | 8.49  | 3 | 136.00             | 28.09 | 3 | 66.41                      | 6.58  | 3 | transmitted                   |
| <i>nek-2</i>      | PBANKA_124070        | 0.00                | 0.00  | 3 | 0.00           | 0.00  | 3 | 0.00              | 0.00  | 3 | n.d.               |       |   | n.d.                       |       |   | n.d.                          |
| <i>nek-4</i>      | PBANKA_061670        | 0.00                | 0.00  | 3 | 0.00           | 0.00  | 3 | 0.00              | 0.00  | 3 | n.d.               |       |   | n.d.                       |       |   | n.d.                          |
| <i>eik1</i>       | PBANKA_130840        | 84.47               | 11.65 | 3 | 109.68         | 55.03 | 3 | 102.44            | 26.38 | 3 | 108.54             | 11.61 | 3 | 94.40                      | 26.16 | 3 | transmitted                   |
| <i>eik2; uis1</i> | PBANKA_020580        | 51.87               | 19.40 | 3 | 19.86          | 15.46 | 3 | 64.22             | 44.57 | 3 | n.d.               |       |   | 14.89                      | 10.80 | 3 | transmitted (4/4)             |
| <i>tkl5</i>       | PBANKA_112270        | 83.08               | 11.10 | 3 | 77.46          | 36.88 | 3 | 100.00            | 5.97  | 3 | 144.73             | 26.40 | 3 | 102.34                     | 19.33 | 3 | transmitted                   |
| <i>tkl2</i>       | PBANKA_092700        | 79.45               | 13.07 | 3 | 124.24         | 15.96 | 3 | 121.46            | 2.53  | 3 | 92.46              | 5.29  | 3 | 83.12                      | 10.89 | 3 | transmitted                   |
|                   | PBANKA_082690        | 83.11               | 3.45  | 3 | 84.21          | 9.25  | 3 | 94.83             | 7.90  | 3 | 84.55              | 11.57 | 3 | 81.98                      | 8.77  | 3 | transmitted                   |

**Table S4. *P. berghei* Protein Kinase Domain Sequences Used in This Study**

>PBANKA\_101090 PbtKL4  
ITFLKKINEHGNGKIFLCSYNI FNNKFFI I KLIDIANNINENYIFKNIFNEVKCLLTFQNSKKGICQMYSYGIIP  
NCNNGFTYYLLMKYYEGNLKDLMNHYAHISYLKEIKKIRNNAKQFFLPVCKKRTEEIILNFKIAKITKKITKRC  
KGNFIFCYKYLCRYTNVYSCYTMILKNRIYIKI IQLKFI LFI LNIFIQI IEQI IYVHKKKI IHFDINTCNILINF  
KKTYP LLM SKKYKIKKNNY INNCNTKQTLKNIQSQIVMRDDFVENERKIYLNFI PPSYQINNSIYKKQNKFYNNF  
DTSMASFHYRQYFKIIMKKKDCQHIAIPSIVISDFGESKFFLRD TDFIFFRKNRGNEILAAPELLINKNKYIYSK  
NKYKIEKKNGKEDTEIKSRKAIQDSFYFENIPQNIIFQNEQSEMNYFYSTITCFENCKKFSCLNTKNDKIRILRY  
NNINMKKSLRKNSIVSLEFYKYLKKIKMLIKKKGNGKLLQKKNINMSKSDIWSLGSLLYEMITNESLFNYNFI  
YIKIYEKKELLNELINKKIKTQFKELKYFFNFFFQFDLKKRKDVYEIYKESIKIYNFY

>PBANKA\_061580 PbEST  
LKLMIHIFGKKYKCYKNENDKMCIGLCYEKLLKIKIKLNNSVIEIKYKPFDIYIDNIKAYNCGLTESECKFLFFQ  
IVNGISFLQTCYQSNIRLTDIKLQNILVFTDIYNVYNPIKWHLCISDFGCSAMEYATFYLENSKNIYINAKTLL  
NQWKYQFKNQLSSYFQGTVYTMapeGLCYDHMGNFQSKYNKLIYFYEQNFQNIEDRFQELQMP LVS IKNSINNF  
NILNVNSSNFHFLEKKGKYE MNNTYNDMDADKNGSEVCKGETNKNKSKKSTNKNVKANESANSNGNNTSSKKK  
GKVEEENNDK KETS DKINLTENNMN SSPEYLPFDVRSDSWSLGIILADLGKCGIGSYEYMISEKGNNGNNSK  
NIIDLNNIILNDLNI LDDEENFYLYQYIMNYDILSIQW DNDIEIENDQVNKNADRNNKRDNSEMENKRNNDNSNN  
GCTNNNSYKSKQKNKSL ENNSKEDVPGNCFVIDNANESISNEVSFCCKDPNAHNNNYDIKEETNNKNNAVLNNQ  
IKSTLNFDECNKIKGNNDNSMKSLELFTKYYSFILKYKYDIKIDKIGYIKNEFVKYKLYKHHMMNENNIERILL  
LLFLIIINNLTYNSCETQSFLKIELTIKNIGSGIFKFRNKKEKERYLQEFKANI QKDYMTGNKEYWNSRLTNKY  
LAVILKDV CYDNFANRRKGIKKCFNKFEYPLNYSDDYWNLLADLLNMPYERLLACEVIGHDF

>PBANKA\_135260  
YSIQNKL GAGAYGEI WYGINLNKNVFPQNVVLK KIFIKKSVDESEQNLDNDEREKEYE IYAMREYVYFGEIFKNCD  
NISRYIEHFKESETSENNKEHITFIWIVFANE GYSLSQHLFETDKNNSGMIIPKLWWSIKKQNI GMLVIKDLMHQ  
LLNGINIAHKKHITHRDIK MENIFVSPNTPFTVRIGDWGSAVEYKNSFFFTPSMEEETE GYQPPELFGHMKN  
FMRLPYDMWIGIGILFLQFVLGTKNPLEIKNKRNEMLKRIYSKSKDILKEVIFIQGLSDLCLIPWVSQTPDRL  
MSLYDMKNNEKNSLQYSS IYGRNLI INKLEYFAITKNLIEIKRKRYNLINNMMSNKYNSLISLPNSPVC PNWKCL  
HKYDEQANYNNKYNNTFDKIQNKFLQKKENYTFFKNNCDDEQFQKILQERDPSGVGLPDKNARDLLRRLDFD  
YNTRITSEEALKHAWF

>PBANKA\_080800 PbCRK-4  
YKIVKKLGE GYVYKVFKAESLEDSYLNFAVKVLR YFWPNFKYKFGSEEF AINEFNI MRILFHPNVVCLLDSFRVH  
TYRKNKIKNHRGQKTRCETLSAEYDFSFQRHRRMEKVQYSPSRETIERNNKYRNI VSKSCLTIEELEKNLVLNSF  
DKEATI QDKGNLYNNHTGKVD ETSTIFSNNNCVKVLNYDEENNNLDNNKSNVLS SKMQORDIKRERSGDIFQYYP  
KKMKTSNYKNGRNEAVKVMNKSIDKLFKFKHKKLKKIENKNDYIENWDLFLVIEKDCSLNDILNKAKKKH  
FSFIQDIKDDTTKCLP SERIDLSYDHLHNYVYVYLP LKKIENRYFY PDMPSLTEMQTKVI IYQMLQGINHFHK  
FI IHRDIKPANTLIKNIQYLS DGLNDSKEWIVKIADFGLVYDHF LKTETKDCNIITLQYRPPEILCNSTLYNYS  
VDIWSIGITMCELLGFVPVTSKFESSVLFKILVFRGIPDQNF DNLLKELV GELPKFKVDRIKMLEIIFTDIYG  
RRILNDKGLDLIDQFLSYDYKNRITANEALKHEWF

>PBANKA\_123020 PbCRK-5  
VSL EEKLG GGT YG DVYKGVKVN NNNSDLYQNTNYLPYDYTTDEFIIFRKNIYAIKFFKDDLRTINEEGISCTT  
LREL SCLKNIGRHPNII LRLIDVTIDRQKGI SEYINRQILQHYSNYYHHQVKIDMVPLSLDQKFI FAAYEYCDGGD  
LKKLIQKTKISENQAGLCLKEAKWLSFQLLNGLAYLHNNKMCHRDLK PENVMLQYTHNNKYLLKIGDLGLCRELK  
NDGDMTP TVCTIYYRPLEVLLSKFDRSKTRSGKNGVKNKSGSGS SAKNGSVKNGSVKNGSVKNGSVKNGS  
VKNGSVKNGSVKNGS IKNGS IKNGS IKNGS IKNGS GRCS EGRSDDAYMGDEAF EKDYESFNDRDFQYGLNVDI  
W SAACIICELIIGKPLFRGVTEFDLIIRIVNSL GKPNNDELEYFSDSRFY PFKDDFFNIKIKNRKDALNVI TNGKI  
DELGIDL LKMLKYNPNDRITAADALSHPW

>PBANKA\_135090 PbCRK-6  
FDFMDIIGKGT YGVVYKAIDKKENKIVA I KKI INLCDHNYGISKIILRELSILQKINHKNIIVLRNIFYGKDIEQ  
KLIGENLENSCLYLTFEYCDIDLNF TKIYNLNIKEVKYIIFEILLALCYLHSNNYLHRDIK PENIFINSKGEIK  
LGDLGLSVEKSDNMTPSVVTI WYRSP ELLKQNNYDQKIDIWSL GCLFVELITGRPLFP GKNDQS QLDLIYATLG  
NKTEIAMDNIERYSFPYEEHILKSMISDESVC DLISKMLIYDPYFRISSKEALKHSCF

>PBANKA\_071730 PbCRK-3  
IVKIHQVGGAGYGDVWMAEDIENNKRIALKKLKLNGNKEGLAKTYIREISILNSLQHKNVVELIGVIRTNIIP EE  
IKSNNI LYNFEKKQLLNQVVKDKSIDSYIMPDRALKKKLAKCSSIYQSSESESESSSSDSSDGI SCDSDSCL  
CNKNPLNKKVNSCASIWMVF EYVPFDLSGYS ELLREERQKDRYKNMNLFTIGE IKNIMLQLFQALEYCHKNNVI  
HRDIKIANLLIDANGILK LADFGLARFHIDSFASNMTRN VITLWYRPP ELLLGSENYSSSVDMWSCGCVL GELLT  
SNPLFTADNESDILKTI VNKIGV PNNNDYKFLKRLPLWNKIKFNPIHPSNINNLNQTKKIETEYI IKNLNGVGEI  
GLDLLKLLKWDPLERISAHDALSHPW

>PBANKA\_113320 PbPK5

YHGLEKIGEGTYGVVYKAQNSDGESEFALKKIRLEKEDEGIPSTAIRESISILKELRHSNIVKLYDVIHAKKRLILV  
FEHLDDQLKKLIDVDCDGLLESVTAKSFLQLLNGIAYCHEHRVLRDLKPQNLLINREGELKIADFGLARAFGIP  
ARRYTHERVVTLWYRAPDILMGSKKYSTPIDIWSVGCIFAEMVNGRPLFPGASETDQLMRIFKILGTPNSQNWPDV  
FKLPKYDPNFPVYNPLPWETFIKGLDDTGIDLLSKMLKLDPNQRITAKQAI EHPYF

>PBANKA\_121280 PbMRK

IFKPNFLGEGSYGKVYKAYDVTVLKKEVAIKMKLNKISNYIDECGINFLILREIKIMKEIKHKNVMNALDLYCEK  
DYINLVMEIMDYDLAKLINRKILLTDSQKCCILLQILNGLNTLHKYFMHRDLSPANIFINKKGEVKIADFGLSS  
KYAFDMHSGKMANDKYSKRALNLTSKVVTLWYRAPELLMGSNKYNSSIDMWSFGCIFAELLQLKALFPGENEIDQ  
LGKIFFLLGTPNENNWPEAKHLPYTDFTKSNKKLNKNIKIEDDDCIDLLTSLKLNLSHERITAEALKHRYF

>PBANKA\_071990 PbCRK-1

YKLNKI SEGTYGTVFRAQNKTKKI IALKQLKFNFSNIRHEGFAITSLREINILLQLDHENILSIKEVIVGKHLN  
DIYLVMEYIEHELKMLLDNKSFGFTVSELKCLLQQLLNGVNYLHTNWMHRDLKPTNLLYSNKGILKICDFGMAR  
KFSHVDNPNFTKNVVTWYRAPELLLGEKCYTNKIDMWSIGCIFAEMILKKPLFLGENEVDQMWKILNLLGLPDK  
ETYPKFYEYSFISKNKDLFKKKKIKMNVNIRSHFPNIASQFSGLYLSDIGLDDLKLLHFNPDQRMSASDALKH  
PYF

>PBANKA\_091210 PbCK1

YALGKKLGSGSFGDIYVAKDIVTMEEFVAVKLESTRSKHPQLLYESKLYKILGGGIGVPKVYWYGIEGDFTIMVLD  
LLGPSLEDLFTLCNRKFSKTVLMTADQMLNRIEYVHSKNF IHRDIKPDNFLIGRGGKVTLIHIIDFGLAKKYRD  
SRSHTHIPYKEGKNTGTARYASINTHLGIEQSRDDIEALGYVLMYFLRGSPLWQGLKAI SKKDKYDKIMEKKI  
STSVEVLCRNTSFEFVTYLNYCRSLRFEDRDPDYTYLRRLKDLFI

>PBANKA\_093860 PbCK2

YEILKKVGRGKYSEVFNQYDTEYNRLCAIKVLKPKVKKKIKREIKILQNLHGGPNI IKLLDIVKDPVTKTPSLIF  
EYINNIDFKTLYPKFTDKDIRYYIYQILKALDYCHSQGIMHRDVKPHNIMIDHENKQIRLIDWGLAEFYHPGQY  
NVRVASRYKGPPELLIDLQLYDYSLDIWSLGCMLAGMIFKKEPFFCGHDNYDQLVKIAKVLGTEDLHAYLKKYNI  
KLKPHYLNILGEYERKPWSHFLNQSNMDIAKDEVIDLIDKMLIYDHAKRIAPKEAMEHPYF

>PBANKA\_101330 PbMAP-1

YDI IKKIGKAYGIVFKARCRKYKIVAVKKIFGAFQNSTDAQRTFREIMFLHQLNGHDNI IKLLDVMRAKNDQD  
IYLVFEYMETDLHEVIRADILEEVHKKYI IYQLLRALKYMHSGLLHRDIKPSNILLNSECHLKICDFGLARSIS  
TEVNENKIPVLTDYVATRWYRAPDILLGSTNYTEGVMWSLGCIMAELLGKPLFRGNSTMNQLEKIEI EIVGKPN  
KKDIEDIKSPYAETI ISSFADTGKKKKFFSEIFHKASQDSIDLLEKLLQFNPTKRITAEMALKHKYV

>PBANKA\_093370 PbMAP-2

YI IKHLIGRGSYGVYLAIDKNTKNAIKKVNRMFEDLIDCKRILREITILNRLKSDYIIRLYDLIIPDDLKLF  
DELYIVLEIADSDLLKFKTPIFLTEEHIKTILYNLLGENFIHESGIIHRDLKPANCLLNQDCSVKVCDFGLAR  
TINSEKDTNIVNDLEENEPEGPHNKNLKKQLTSHVVTRWYRAPELILLQENYTKSIDIWSTGCI FAELLNMLQSH  
INDPTNRFPLFPGSSCFPLSPDRNSKKVHEKSNRDLNII FNIIIGTPTEDDLKNINKPEVIKIKLFPHRKPINL  
KQKYPISDDGINLLESMLKFNPNKRITIDQALDHPYL

>PBANKA\_141450

YKLIKLI GKGTFGKYYAIDLSTQEPVAIKRSPKWRNKVSREVDLLKMMNYSKNIVNTKSI FYTTTDDKGFRIQNI  
VPKYMTYSLGKFI RLKKQEKRENNQICLGIKNLHEHVAHRDLKPDNIIINLDTPDINVEICDLGSAKKVEKSI I  
SIPYICSRWYRAPELLCGSMYYTTDVLWLSLGCIFELINLCPLFPKGKFKDEYSEECQIVNLI EVLGSPNINF  
YENIKDYTSTKNTSLIKELCELDIPPLSWDHILGNILEKEDPNERLKIDEVLDNSYF

>PBANKA\_031030 PbPK7

YKIVKTIHEGKYSKIIMCDKDGELYALKKYEKVFLEKKREFQKKTCDNKVI IKT KYDDLKNEKLIITDIKNEYCL  
SCKEIIITNNDEVYIVNKYMNESILKYDHCFFIFHPNESYFIPPIPKVMKNILKSLLYVHTKKNICHROVKPS  
NILLDKNGI IKLNDFGDSEYMINKKIKGTRGTYKFMPEFFVNTKCYGKVDIWSLGCICYALFYKVLFPFNKS  
GLINLQFQEI AKKEIKYHIDRNYFLLKVRKGATKSSHDSLSNDDINFLKIFLKKKPTERCTAEAELEHKWL

>PBANKA\_136210 PbTKL3

IIILNKIGGGSYAQVFRGKYGKTVACKLFLYNTKDLSEESYCESYISTPRSTHQYIFPKIFKSMTSAESEIGDV  
NHDIEDNINFEKYVNSIKSYTEVSEKNDANISEEVLTNLCTLQRNKKIKKMANLEIFRYFPTPIKYRNYEAKILY  
SLQNCHEVILKLVGCSLRQGEESLILQYCSGGSLEKYIYDERKKINKQNKHLSRPQVVKIFQQIAKGMYEIHSN  
NFFHRDIKLSNILLDENKNAFISDFGLSTYFSLNDSPSAYAIYGNIFYAAPEVLKGGFFKESDVWSFGVSLWEA  
LTKKIAYDGLSSSETFCKISSGELHLPINNDIPKDLSDLLKSVLEYDFTKRPLFDVIARKLEHIWE

>PBANKA\_080560

MNYTLISAGSDAIYKCDFIGKEAIAKKVIYRKYRHHKIDSKIRKLRISNEIKFTKKLASLNIDVPYLYFVDTKE  
KSLYFEYVNGCTINNIKLSISQYQPNIPKFIGITLAKIHNGNVIHGDFTTSNLILRYSYINENEIFNNLNAPYE  
LNDIKEIKLCVIDFGLSFLSASVEDKAVDLFVLLKAIKSFHSEFPKLEEDILLGYETQSNNFDLIRKKLETVKQR  
GRKRPMV

>PBANKA\_041040 PbGSK3

YKLGNIIGNGSFGVVEATCIDTSEKVAIKKVLQDPQYKRELMMKNLNLNLI IYLDKDYTYTEAIKKNKKNVFL  
NVVMEYIPQTVHKYMKYYLRNNQFLPIFLVKLYSYQLCRALGYLHSLKLIHRDLKPDNLLIDPKTHTLKLCDGFS

AKSLISGQRSVSYICSRFYRAPELMLGSTNYTTHIDLWSLGCIIAEMVLGYPIFSGQSSVDQLVRIIQIILGTPTE  
DQMKVMNPNYADVDFPNVKPKDLKKVFPKGTNNAINFVSOFLKYEPLKRLNAIEALADPFF

>PBANKA\_070970 PbPK1

YKISHIIIGNVYGVVYKADCLENGNVVALKQTYQKSAKYFKEIEIMKKLKHPIVVKLKHAFYTLCPNGGIYVHMV  
MEYGNTDLATSLYIITIKNSEHVNTYKNINNSKYIKNDKNDVVKLNDCTNFIASEENAKCVNNNNINSINESE  
NKENLEKLQMNKCNENCMNVHDPNYNEMTKNLNSENKCNENKIDVNSYNNTEKEINSSNNNNVKSSENDCLNTYG  
NIINNFNINMLQENINNICSCHNLSDYIKKCFNENQVKIYLYQLIRATLYLHSLCITHRDIKPQNILIFLNKPN  
NNTDNSHENEKTQNKKCVVCIHNSVKFKCIMNKRNMNKSLENNNSNVNIKNSIVNNDCCNNNEYVVNNSNALLNED  
IEKYHKNYTSKFNSINENNDIKKVNKENGYYNCCSTPISMLSEKKNNSNIKHAREKRSMSFSNTYTFKNSDNEHF  
DYMDNSNKNDFKALKRSKTDLVIISLKMNTNTFNEKKEKTLPLSDVDKCCIDSCENVKEKNEITNFNDELND  
IYNENNLDKIYMNSIVYKIKLCDFNTSTKLKENYKLSYVCSRYRAPELLFGSNYYSHAIDTWSIGCVMGELI  
LGKPLFLGDCASDQVLEIKILGTPNDEDFLSFRSIVKYNVFPNIKPIITLKKLISNNSKESIDLLDKLLQFNPK  
KRIKLC SALLHNYF

>PBANKA\_144300 PbNEK-1

YEVIKKIGNRFGVEVFLVKHKRTQEFFCWKAISYRGLKEREKSQLVIEVNVNRELKHKNIIVRYIDRFLNKANQKL  
YILMEFCDAGDLRNQIKCYKMFQKIEEHAIVDITRQLLHALAYCHNLKDGPNGERVLRDLKPNIFLSTGIRH  
IGKITAQANLNKPIAKIGDFGLSKNIGIESMAHSCVGTPIYWSPELLLHETKSYDDKSDMWALGCIIEYELCSG  
KTPFHKANNFSQLISELKKGPPELPIKGSKELNFLIKNLLNSAKERPSALQCLGYQII

>PBANKA\_124070 PbNEK-2

YDVVKSIGRSGFIVTAVKNEQGEIFVVKQLDISCMNYKEKMNVINELKALIEVSTHPPFIVKYKEAFIEDGTYLV  
AMDVCSKGDLLKYIKRAKEMKTIIPENKIKRWLLQIITAIFKIEHKKLIHRDLKCNIFLDENEKAKIGDFGLAK  
LLEKTDQNTLTCGTVGYMAPEVCKNVPYSFSADIWSIGVILYELIALRHPFKSKNGNMLSIVQKVCEEQPDPLPS  
IYSKDLRNL CYWMSKCEKRPTVYDIIGTEYF

>PBANKA\_061670 PbNEK-4

YEKIRDIGKGNYGNTIILVRDKNDHYVMKIIINISQMSQKEKRQCLKEVELLSKLNHPFIVKYIESYIEGETLRIV  
MKHCKGGDLYHYIQNKKKQNTPIKEKRILIWLTQILLTALKFLHSNHILHRDMKSLNILIDSDKRVRLCDFGISKV  
LENTLDYANTLIGTPYYLSPCLCKDKKYSWPSDVWAIGCLIELATFRTPPFHSTKGIQQLCYNIRYAPIPDLPLNI  
YSKELNNIYKSMILIREPNRYVTVQQLLVSDIV

>PBANKA\_060060 PbNEK-3

YKFETVLEIMTSNSEIHLVKSLEDTNETFISKVYDLYGINENDLKNYMNELYIMKKLENCENIVKIVDFIKKNDL  
SFIIEFCNQGDLYSDILRRKINNEHYSESEIFNINLQILNGLSSIHKNGI IHGDLKSTNIFIKDDKIKIGDFGIS  
QKGSNKNLGTNLNLSYESIKLNKTNKLSDLFQVGCILYELVTLSSPFSANNINDMIRLFEDKNYKNEI IKNISSF  
YSIQLVDIISKLLSLNALDRLQVISNYNIVRN

>PBANKA\_010410 PbNEK-5

FDIAGFLGDGAHGSVFLACERRTNFICVLKCKISKSHLVKSTQEALLRKEIELQAHLKHPHIACMYTWFHTSSHVF  
FVMEYCSNGDLFTYLNEHGPFSEKKVATMLFEI IWAIRTCHDKRIAHLDLKPENLVNHEEKCKLADFLSAHIG  
SKHKKKGISHYRGTHDYWSPEQCARHQKKNFGEFDQKTDIWTGLILAFELKFGRPFFGSTNEEREDIIMNRIQ  
DYHWSQLFSEKVKQDLIDKLSPEFKNFLNLCLDKNPKKRPTAEELIQHPFI

>PBANKA\_083560 PbPKAcat

FNFIRTLGTGSFGRVILATYKNEDLPPVAIKRFEKSKI IKQKQVDHVF SERKILNYISHPFCVNLYGSFKDESYL  
YLVLEFVIGGEFFTLRRNKRFPNDVGC FYAAQIVLIFEYLQSLNIVYRDLKPENLLLDKDGFIKMTDFGFAKVV  
NTRYTLGTPPEYIAP EILLNAGHGKAVDWWTLGIF IYEILVGYPFYANEPLLIYQKILEGIIYFPKFLDNCK  
HLMKKLLSHDLTKRYGNLKKGAQSVKEHPWF

>PBANKA\_100820 PbPKG

LLTERIIGRGTFGIVKLVLHEPTKIRYALKCVSKSIIELNQONNIKLEREITAENDHPFIIIRLVRTFKDSKYFY  
FLTELVTGGELYDAIRKLGLLSRSQAQFYLSII LAIEYLHERSIVYRDLKPENILLDKQGYVKLIDFGCAKKIH  
GRSYTLVGTPHYMAPEVILGKGYGCTVDI WAFWGVCLYEFICGPLPFGNDQEDQLEIFRDILTGLTLFPDYVTDTD  
SINLIKRLLCRLPQGRIGCSINGFKDIKENSFF

>PBANKA\_146000 PbPKB

FNFLKVIKGSYGVKLVKHTQSNKLYAMKILKKNIIISQNFQEHKVEKNILKCVSHPFIVKMYYSFQTSKKLY  
FILEYCPGGELFFHLSKLTFTENIARFYISEIIIALQYLHKLNI IYRDLKPENVLLDKNGHIRLTDGFLSKECI  
SDNNSAKSLCGTPEYLSPEI IHQTGHGKSADWWSLGVMLYEMVTGQLPFGKSRDLLFENIKYKIKISNRLSPE  
VVDLLKLLQKNPQKRLGSGITDAEEIKKHPFF

>PBANKA\_082710

FTLKKKLGIGGFGEVWSVLSKSDIEENSSFFFFSIKKTSHFALKIMDINEFNLNESIIMREKAHINVINFCVFK  
GYQLLNRQHEKERKESFCFLLELADTSLEKVFSDKNVAYNLNFVRLTLMELIANIMSYIHKQTPNHEFYIYRDLK  
PDNLIKNNKILLTDFNLSRKIDADFEYLSQCCGTKGHLAPEQKSLVYDQKIDIWAFSIIIAKFLKHKNFNYFS  
YDNYKIDLKHFEIQDKFLINLLVCVDESPFMRPFSSEIFRLL

>PBANKA\_146050 PbGAK

IKEDNLI SEGAYSFVYLANDLNTNKIYTIKKTICQNEKLEMAKKEINILKSLPPHKNIVQYYGSTIINENNYKI  
VIMLMEYCEGRNLLNIFEKNKDIKEFHIIKILKDIISGLNFLTHTQEIPIIHRDIKLENILCDKNNVYKICDFCS



HTVSNSFFPNDLKKNELNLLKYEIERDTTIYRPPPELIDLYSNGEISTKVDMMVGCVLVLLLFGFHFPQGTVST  
KIIRRNDENVNDINPSNNSFLSILNGSFVIPHVTKYSKRIISILLMTLDKNPQIRISSSTLLLLIL  
>PBANKA\_113310  
FSDAGNIGEGGFVVTMRFSLFPQYYAIKKISKDHIKKSQAAGQAYLEAKYHSHVNVKMYGCMQDDNYIY  
HVLEYPKGSISYSISKNFKKRIIPEELAYKYFCNVVNGLYLQMGIFHRDIKMENVLVDHKDNAKLSDFGLSAM  
ILGEKSHSSLCGLTVYFSPEIINGEGYDWRSDIWSLIGILLYEMLVGDVDFDGTQIVQSIYSCNLFNPNFINPL  
AINLIKALVVDVNRKIKLSEIASDPWM  
>PBANKA\_040740  
IVDKHPIGNRTGLVFKAIIRKENLQVALKVMADTILSLKIERQVLKEIIQSSSLKHINILDLIAYFEDKTRLF  
LVLEIANGGSIRNKMMLKHDTFKEEQVALYVYQIADALSYLHNFNIIHRDLKPDNIIHYSDSDVYSDENVSKIY  
KYGIKIADFGFSCQLKNRQKRSTFCGTVDYMPPEIINQIPYGCNADLWCLGIVIFELLVGFPPFTDNSQERIF  
EQIKEFDHFPKTVSQMARELILRLCSRSEERISAEVVKSHPW  
>PBANKA\_090380  
YIVLNNLKGKTYAEVWVKHKVTNEIFAALLQPNQFPKESFNRIVEMFTKEIINLSICQCPGVIKLHKVIGGKE  
GWILIQDYANDGTLWKENLSNNMSEAFLYFIQLLQGMWYIQDMNIVHRDLKPTNIIHRYSNKKIIVADFGWSEHID  
SCNLHPNEWPGTLEINPPEVLRNTGPMTEKIDNYALGMNMLFISGRFVCRQKGVESCKVAQIILKTVHNLRYSK  
PPSRFRENKAWDLFVKLTSNPNERLSLQNVLDHPWV  
>PBANKA\_031420 PbCDPK1  
YFKVRKLGSGAYGEVLLCKEKNGHSEKAIKVIKKSQFDKGRYSDDNKNIKPFHEEYNEISLLKSLDHPNIIKLF  
DVFEDKKYFYLVTEFYEGGELFEQIINRHKFDECDANIMKQILSGICYLHKHNIVHRDIKPENILLENKNSLLN  
IKIIVDFGLSFFSKDYKLRDLGTAYYIAPEVLKKKYNEKCDVWSCGVIMYILLCGYPPFGGQNDQDIKKEVEKG  
KYYFDFNDWKNISDEAKELIKMLTYDYNKRCTAEALNSRWI  
>PBANKA\_040820 PbCDPK3  
YNLSEPLGKGTGTYGCVYKATDKLLKIQRVAVKVVSKKLLKNIIPFRQEQIDIMKNLDHPNVIKLLETFEDEEQIYLI  
MDLCTGGELFDKIIKKGFSFVEMYASFIMKQIFSVLNYLHIRNICHRDIKPENFLFYDKSTESLIKIIDFGLAAYF  
NDIDYEMKTKAGTPYYVAPQVLTGCYDYKCDLWSAGVLFYIILCGYPPFYGESDHEILSMVKKGKYNFKGKEWNN  
ISEEAKDLIKRCLTIDSGKRINASEALKHPWF  
>PBANKA\_061520 PbCDPK4  
YKGIKILGKGSFGEVILSKDKHTGHEYAIKVISKHKVVRKTKDQSLLEVEILLKMLDHINIMKLYEFFEDNNYYY  
LVSDVYSGGELFDEIISRKRFEVDAAARIKQVLSGITYMHKNNVHRDLKPENILLETKNKEDMIKIIDFGLS  
THFEYSKMKDKIGTAYYIAPDVLHGTYDEKCDIWSGCVILYILLSGCPPFNGSNEYDILKKVETGKYTFDLPOF  
KKISDKAKDLIKMLMYTSAVRISARDALEHEWI  
>PBANKA\_135150 PbCDPK5  
YELDKYKLGKGSYGNVVKAINKKTGQAKAIKIDKKRINNIERLREILIMKQMDHPNIIKLYEVYEDNEKLYLV  
LELCTGGELFDKIVKHGFSFSEYETYKIMKQIFALAYCHSKNIIHRDLKPENILYVDSDDSPIQIIDWGFASKC  
MNNHNLKSVVGTPTYIAPAILKGYDKKCDIWSGVMYIMYILLCGYPPFNGKNNDDILKVKVKGFEVFDNSYWSKI  
SLDAKELICECLNINYKERIDVHKIVNHKW  
>PBANKA\_092550 PbCDPK6  
LSFKKILGCGAFGEVHLVEDNICLYKVVILKKKMKNIKVNNEINVLIYLDHPNIIKIFDVYESVNTYIVME  
LCEGGELMNKIKKQIFSETYIKNIMFQILCAIAYMHSNIIAHKDLKPENILFKTDGYDTLKIIDFGLAELINKS  
EGISKTAAGTVLYMAPEVFKKFTIKCDIWSAGVIMYFLFTKSLPFTGNTYEEVKQNI FNSEPDYQFLKLMKSKP  
ALHLLKMLLEKDYSRPMAAVLLHHPWF  
>PBANKA\_101980 PbCDLK  
YKFGKILGCGSFGVVRECTNKKTNEIYAVKIIKHKKHKKNSNFEEKMVKNEINYLSIMSHENIIKLDKDFEDKKN  
FYIVLEKCEGGELFYKIVKNKCLLESESIQIVRQVCTLEYLHNSNIIHRDIKAENFLFKNKNTENIKLIDFGMA  
KTVNCEYLTELCSPHYISPILIRKKYTMSSDIWALGVMVFFMLTGKYPFEGKNTQKIVDEILNKNINWKDNEFS  
SLSVEAIDFLKLLERNERKRLTAFEALNHPWI  
>PBANKA\_131370  
YKIINKIGDNFSKVFCCRGENKCKCAMKLMCCPLKKTSHYCNCFKRELFIMKTINNKHPYIVKILDYHEKIWKKY  
YIVKLILEYCEGNLFYIKINGSCTHSEARVIIKLAQTIQYINSLKIMHRDIKPENILLRTKDNISVVLSDF  
GLAKITPSNQSVVKSRSVCGSDFYLAPEIKNKEYGKIDIWSLGVLIFFIITGKVPFTGKNANELYNNILKANI  
PELLSKEKSLNIQPLKNLLENILVHDPEKRFSCSDILNHRWI  
>PBANKA\_145340 PbPK2  
YVLNKKIGKGSFNSVYIGTNIYGNRVVVVEVDKSKVKESNVYTEIEVLRKIMHKYIIKLIISAYEQEGYVYLVLE  
YLKGGELFEYINNNNGPYSEQLAKKAMKRVLIALEALHNSGVVHRDLKMNMLLENVNDPSSLKIIDFGLASFLNS  
PMSMRGCGSPGYVAPEILRYSSYGTKVDIFSLGVILYNICGYPPFRGNNVKEIFKKNMRCHISFNTKHWLTKSE  
NVKEIILWMCSKNPDDRCTAIQALGHPWF  
>PBANKA\_092520 PbCDPK7  
YEIHEQLGQKFSKVYRGINKQTNSEFAIKVINNRSVSIEKELLRSEISILRLLRHPNIVFLKEIINTKETLYI  
SMELVKGGELYDFLLSETRLSEIHANKIISQLIKTVAYLHKCGIHRDIKPENILLTDKSKDAQIKLTDGGLSTL

CAPNELLKEPCGTLAYVAPEVITLQGYNHKVDAWSIGVILYLLLSGKLPFPINKNTEMNIQKTYVLSFRDNIWKT  
ISSSAKDLISKLLELNADKRISASEALEHIWI

>PBANKA\_040940

YKLLKVLQSAIYGTVYLSEIIEEDVNKKLINTKKAIKILSKHLIEMAKERIQEDPLSEYYYRDSMSGHSNIIICDS  
IFDDAAAYIYVMVMPFAMHGDLFEVMKNRNKAFFSEESRYLFYQILLAIKFLHSKEMALRDISLENVLLFENETNGL  
IYPVLNDPGQALHFVNKNNEVILEEYTKTFGKIFRPPEIHAKCKYDPTKVDVFCVGYILYFCLTKQELFRSSVE  
KDIYWNMLVHKNYRELLTDKNGIHLSDAVDLIFHCLDPNFQTRYSINQVLSHTWF

>PBANKA\_040110 PbSRPK

YRIEGLGWGHFSTVWIATDLKSKPLKFVAIKIQGSETYTESAKCEINYLKTVKINSFDSSWVEFKEQQRERLF  
HYNMTKGVVVSFIDSEHKGPNGTHVCMVFEYMGPNLLSLIKHYDYKGIPINLVRKIATHVLIGLQYLHDVCKIIH  
SDIKPENVVVSTLTNI PKPRDYTKSKLANNDTNIKNVTKNHCTSPSRPEQENNINTEKDFDKVEPQIDETKQG  
ETEQQDTESNATAVKEQNEFDNVDWNKLTKNEKKLKRKKKKMFKKERLKMNEANNTEKNQQTNEAKINNLSHA  
EDNRQFKKEDNENFRNIECIKTDDISLEQIQISTKMTFNNSMNPANPKVNINTNKNSTISGDCNNQNLNENSDMK  
LCKDETKMDSKQIISNTVGGKLSFVNANMDNFSINENKLSDSLKEETKENTKCSIIEEDNEKNKIDNNNNLNKIKK  
KKKKINEPPYVKHRLKPSNSDPSLLTTYNIHAIQETLTRKPYHYNNYFLNNPEKFGYDKSPQLLRRLPIDYLRN  
DSSLEASNNSCNDNNTNDTYSEKSEIYVDKANKFPIYCGMFNHLIHPEAMKLNHESNKKKNIYSEVPNENQSL  
GNNKNTNKVVYIKTEEGDYCIRPYDPTVYVYHEKSCYKICDLGNSLWIDESRYAEIQTRQYRAPEVILKSGFNETA  
DIWSFACMVFEVLTGDFLFPQKSDIYDKNEEHLSFIEVLGNIPKSMIDSGYNSHKYFNKNTYKLNKIKNIKRY  
GLYKILKYKYLPEKEINPLCSFLLPMLSIDPQTRPSAYTMLQHPWL

>PBANKA\_093300 PbPRK4

SVVCELVGKGVFSNVLCYDMTNKIHVAIKVIRDNHMMHKAEEKEISILKLLNDYDKDNKKHIIIRLLRSVKYKNH  
LCLIFEWMMGNLRIALKKYGNHGLNAAAVHCYTKQLFIALRHMRKCRIMHADLKPNDILINEKFNALKVCDLGS  
ASDISENEITSYLVSRFYRAPEIILGFYRYSQIDVWSAAATVFELATGKILFPGKSNNHMIKLMMEYKGFSHKM  
IKGGQFYSQHFNDNLDIYVDRDHYTKKEVVRISDLRPTKNITCDLLEHQYWLKGNSPKMQFLKKIKQLGDL  
EKCLMLDPSKRYTPDQALQHPYL

>PBANKA\_030850 PbTKL1

IWLLKLIIGRGGYNNVYKCLYINNIKKCRNYKMSNYRNFNINHSINNIALKICIDKKYSYDFFSELKILSILRHPN  
VSLFLGGIRDPAIALEYIPYGSIFDILHKKTKIKILDIKMKCKDITSFMSFLHNKGILHCDLKSNNILLSESG  
EIKICDFGLS IQNFDNPKPYLGI VGTYQWTAPEILRGEYTKKADIYSFGVILWELLHRTIPFNDLKHPLDIAIQ  
VGYLNKQLIINNINNNKLLVLTSLCHKDKRKRKSFFFWSEYF

>PBANKA\_112690 PbPK4

FQNIISLIGQGGFGSVYKVSHRLEPGSPTYAVKFIYLVKSSLDNVNSRRYFREIAANRDIYSKHVRYTWWCEEP  
QFLPMDIIPKEIQNTLKKNKDPFKKVCNKNKNDNDYSSDCTVSSGENNKFDLKNYKQVITKKNSPKLFYSDNDT  
PYNKRKNINQKNSFLNDKNLSDNIIYIENNNKKKKKKKKKKKIIYKEKKKGNIGINEDNKYSTFYEQNNPNPNS  
TLQEQYDFPGYGLSENERDLIVFADNDESNKSGHKKNDNDRKSLNNQNGIYNTGGDI SKNGNVIHDDSNMLAC  
QQSDKNSMTIKNTQGTSTINGTINRNTISDEGTGTQGTNNPNPKYSIDYHIDAIVKPKGESFTWVEKSPSNKYKDSL  
DIINRNRKLIIEKNKKEKQGEKEKYKLMNGELEKKNANKIKYKKNVGPPEFSIVLLLQMEFCGFTLRRLD  
RSSRSDKPLYFTYGDKNTHPLEFDLQKLIKGLKDIHSTCFIHRDLKPENIFVDLDTYILKIGDLGLVRFIEEK  
KRENDLNNIDNFKDNIYTEINHNTITSQISLKGQMITPGYTAPEGGALCDEKADIYSAALILLELLCPRFNTIM  
ERYKTLNDFRNYTVPDYVKIHLNPWYILMLQMSKPNPADRPSAADLYNKI

>PBANKA\_130840 PbeIK1

FIFMYLIAAGGFSCVYKIKKKKSNKFYALKKIKFSANESNYEKKVLLNLREIECLRKLKNHPNIVSMNDFWLEVV  
QTLSSKSKRERRGRKEQQREQMGDKRREKRQQRREKRKEQNTNTKKRVLITLSDHKKKKLHLSCPENALNISN  
ITNNERNVLKKNWKNLILLKNFKKEKHNYFNHQLIELNKNYIMCLWKILNQMCVCKNEKKNIESLPEQLIKNF  
KNFLFEKYILAIYDDCSYLNKNKNTFIFFNNLGNILHYLWWSYLGKNGKEKKNIDFKLLKYVSDNIKDNNTL  
YNIILEFRHSLIELSRFSPNELGNVILNMRIPNGSCELSEYISNMAKINKLEIYRNKNTLEKFIKINCNMFDV  
YKMWINFKNDIIEYEGKDVYKEHRKINLKRKIKKKDIWIKGKKEKHLKNTIGNKCIKKINIYKEPIHVFVYKSL  
TYKRQKHHKLWRKHYNKKNWYCLNKHENSKKYILFSKICRLMKTQMNKFKREKFEKFKKAIATNIKVNYNDF  
EQDISSFNIIQIYNKKNQQLINRIKEQYEQLSISLNPYKLYENENILRYNEHNYLFLGLKNDNEKENIYNAIYFL  
NFYIWRREINEYAIISKKRQICQNSRNYQSKKKFYIKRHNQKTYFFENIFFYHYIMLFLDIEKYKKNFVSLFQ  
YNLYRKLKISKRIVLMHR IETNVICIFLLKHFEYDFIRKGIHIVQDKSDRSNKGDEIGIHKMVKIWKSMIAIS  
LIFGKKMYKKKNIFNFIEFLNINIINIFKKFEILYLIIFYFNYFEKSKQFDIEGIGDIYVWLSLINLFYDD  
KGCIKILSKIFAKLNKLYVYWGKLYIIMNWTIVDTIFIRNVLSINREGNYWVIIVLKMINYFVNVAYTLT  
RMDIFFIKVMIKFYTRIGSAAATNSVSKNSYNEIFNIFTLNFMYI IYNSYFENEKKNYDIYTKYAILFYCFI  
IQAYYFDTLFNIRSLESNEIANLFPGYNSYKNILLFYERLGRVINKSNNTKICKYMWKRFINMWSNSIVIKEN  
IISCLTTSRHIYFNILMNFMKIYCLDNILHIKKKKKKMNTPIVLTSKNDLKKWKDCELTKNPKSVKKGILIKKN  
RNNKYYKKLKEKTHFIYNIKKVLFKLVNINIETILYEQNGQCYILVFGSVIKKKNQIKVKDTKIVRDINIIR  
DYRIYFYNLEYFYKNNNAHISDNINLIYARKWPYNNKNAVKQFCPYFDKIKDGNRKDIVSLYGNKILVKQNFSKI  
GNKIKNKNLCKKMRQTQKSIYNSNYWREKKNKLLNGNVNIKKYKSEKIKKKELENFFDNIVYSSENDDFKI  
IFENATNSNACSTVDLAPNELNTRNNINKKLFKFKHKNKSKQKNYKNHSHKKIFFKSVNNANRFVTVNVEP  
NPIMSNHQIADSNDIYNNFSIQKKYENHKNCGNIYNTKDCDENDSSYICFLINEHEGQVLSHRHKEYLNMLG

MERGNILYRDNACKLKDDFSLHDQCDNSMIKACGTNELIKESTKIKRENMDKINKMNEVNQHISLETLYKCSF  
KKIDKNLIQNKKKIIIRKICQINKTFYFKYKINDKKRIYFDSVLCKSERHKTYKKRNENIKVILLKTLKGSNE  
VYLTYLTYLTIYSDNINDPFENSRRKKINSNEIFYQKTFDMYCIEDGEVEYEEQKRVNKNKKKKYINEMIKMDTIR  
TDFEDNFTNSYNKKCNILKMASNINNNKNSGKKERDIKRQFLITNKKKHENNIKIFYNLFKLEESNVNSNPQTNP  
YYETVIHDNEDNIFYCYLYYIQQQVYRYCNCIDIDEYTSNCIDKNVKNWEWYGFIKENENYDKIKTEINSNSFYNC  
REKHNICNSYNSVYQLEFRKLGNASKEKNFEKKKIKIEFRKSFNNFKLPSSLCLILKWDNFFKPHFIIRCDNFL  
HTYNIYFDFILLMNLFHKGEGSNLYRFNSNKSIIYNPYLHQIYMVTKYFISNVHKINNKLPIHLENDILEIYS  
YNRFLTIPNKCSFKNCGNDNNYDQRSKKHFTKCGILNTEKVKPSKRRIGWDGQRQRKRKDIINTLNEENQNM  
FCKNKEKKEENYKIDTNISQFSEKNPVSNDNEKNKQNFIKNKYKFNLYIRMEYCKDTIENYINRRTRINIKR  
NIEINMIIMGLNYIHNNMIMHRDLKPSNIFISNNDIVKIGDFGLASYDYLDHDKINTTKEEEIQKDLINKNCD  
KIFFCNKKLFNSYNSVFPLENGQISDVHNTKGDYNESSISKSKKFAIQKNRNLRSCKRIFQWWSITIGELNLS  
KNRRRLTKFKSGSNTIHIRKSTLDENIIVRHANKCHNLFSQNRHIDRNRMKKCNIIKNHIIKSNKSEKMNISM  
NVFLRCTKTRRYFTDEDKSVETRKKCSKTSEEENGNICDTYKKNNDIGEKMKNKIAAQKKKKKENKHPIGRRS  
TNSSISSAIVVKNAYCRLEIEKYFLSKSFQNCRSNKKKKYINIKTIKNKFCASANKNFGAKWMRIYRGLHDD  
IQEKADQTTQMGCCNKTVASDFSSNLKNKESINHTLIGITKLYSAPEQLEGNKYTKSVDIFSLGLIIDLFI  
KTETNMERTQILCNARERILPDLLIKHPNVAASLCKMMLSLDYKSRPSTSAQLYKNI

>PBANKA\_020580 PbeIK2

FSEESVLGCGGFGYVMKVNKKFNIAVKKITLSSYCPNKRGNDELNVKNYNNHIKKNKSKHNDIEPMISGSFSS  
GNNIMNENSLIMEEVIMIAKLQHENIVRYDADWVENNIDYFLKEIENNYKYVVKKNKGNKKNIIYIDEISNI  
RNYNKNKNENIKINEKYLILMEYCPGKTLREADICGFYKNEKLIWELIKQILKGIYYIHDMMKMRDIPKSN  
IFLQINDDILSAKIGDFLTKIDNTQINPSAGTVNYSPEQLNGEHFDQKADIFSLGVVFFEMFHEPSTSMER  
SIVLSNLLKCIYSPESIRSDNKIFQFLLSLEIDPQNRLSAYSLLHENF

>PBANKA\_141360 PbpK9

YIVEKRIGSGGFGIVFQGIHIQTKQKVALKFIPKSNFLDVTDVHRVFIIEIQTLRGLIHKNIKMYDVNHFQNYVC  
LIMEYAVNSDLKYYILKNNGYLSEKETYFLFLQIVKGVYCHSKHIVHRDLKLENILLDENMTCKIADFGLSDFV  
NVDQNIKTEAGTKLYIAPEIIFNQTTNYSVFKLDIWSLGIILFIMTQGYPPFIDVGKDIKYFEQSTLKYSDISD  
DLKDLISLMLNVDPNKRPIIVEILNHRWF

>PBANKA\_131800 PbkIN

YIIKNIKIGKTFGKVCGLMHTYTYEIVAIIKILNKKLLRIISYDKILREIKIHKKIDHNIICRFYEVHENKNIY  
MILEYLGNGDLLTYICKNSINENIARIAKILYQLISAIYELHKNINIVHRDLKPENILLDHNNIKLIDFGLSTIYS  
KNNFLQTSKSPFYTPPEILLGKKYNPELTDVWSLGIILFLLNKKLPFNHNDINKLQIQIKGLMQFEPHVSIN  
AKNLIQNMLNVNCKNRYNLNQIKNHIWF

>PBANKA\_130920 PblAMMER

YKVMRKMGGDTFGRVLLCQHIVNKKYAVKVVNRVVKYTKSAKIEADILKKIQSNDIKNNNIVRYHGKFMYDHM  
CLIFEPGLPSLYEIIITKNDYNGFHIEDIKLYCIEILKALHYLRKLLKLTHTDLKPENILLDDPHFEKKIVTVKRV  
DGKKIQIYRSKSKGIKIDFGCATFKTDYHGSIIINTRQYRAPEVILNLGWDVSSDMWSFGCILAELYTGNNLFT  
HEHLEHLALMENIEPIPKMLYEATKTNGYKIDKNDLKLAWPENASSIDSIKHVKSLPLYKIIKHDLFCDFL  
YTILRIDPTLRASPVDLLKHEFL

>PBANKA\_090110

IRMNLIIRGGFAEVWEVFDNINLEMYAAKIHKIEPSMTNEIKNKIIQRAENEINIIHCHRHFIVKLEFFFFV  
GSATNLLVGMELCDVDLDKYIKYHGPINELLALSWIKQILLGLLYMKNLPTGKVHHCCLKPANLLIKDGIKISD  
FGLAKLILPDTYQYNGGTYQPECLPKPRNLLITDKIDIWSLGCILYEMIFCERPFQFNYLEKCSKELLVN  
KMKRGLSYPKINQHISKITLNYIEYLLNFDHECRPSIEEALSYPIF

>PBANKA\_112270 PbtLK5

IKIQSYLSKGGFGVYKIGILLKKNVYEEICDQNSKYTSDFHNGLDDGNSVEKEYNNIEEKEEICDQDVKIKRKK  
MLINKQKENNDKIIAIIQDDNCNENVKQKNEREKEIHNKDFENPNSEQNNFRRLYAEVMKVNKNNSNHCNMNT  
KKEYNMRINLKEDNKSVEINILKKKKIINEYNNNGNDKNGVNYSEQANKDINEIFGEQINEDNRSINSNGENKFK  
LLNFPFFFGNMEKKKKNYDIEEELKNLTFNGDNMYQNEHVKKNEQYSHECHKGNVLPQQCLHSEEIKELKKS  
MLNFIYGNKCCDDIVIEKNCFINEAEKINKLQSNKDLNKKYNDIEISYLLVEIYHNNIVYNNNLSFLCIKSKN  
IITFSLNKDYLYIFDSQNIHYYSKSIKIVFIDDYKILNKYKHFTVFNILLNDKVLKNSSILKREINKHKNGL  
NKLSIIPFSLNMLNLVNALIFGFLKFIINLRKKYHTIKKDCYCSLCKNPKNTNFMNIIASFSDRGSNPNDYDQN  
FDDLESILLQNKINILDELICINSNNNDENIFSYPKNKNTTFRNSNLNHPPEESINDDNNAHIIDKEKTNF  
RGNDNSIYHIVNTSDSGTKNNISNVNINIKNNLNKPNIAQNDEVQLNGNKGKIINSSNQGLGDSSTLLNSNTDEC  
KTTIILNLSKNKNVSKDYINEKEYNNYVSKIKNNEKNKEEEDDEGNTSNMKNHDKKTYIQEKLKINCENSEN  
KNREGNDFETPDNEEREVNEEEENGNKDGVEYMQIPVAIKIHDLKDSKNLKNFLREIEIYKNLQRSNICKFYGIC  
IKHNKMLLLEYYAKGNLNFNFKNKNKIHKKQRLWAIQMCSIVHELHSHNPPINGDIKSNILINNMDLVMC  
DFGARFKNSKLYSNFGSYRYMAPETFSCSTSEVTEKIDISLACCIVEIFCSKYPYNFNFKSNTKIRHELIVNKRT  
PHIPSFLPNSIKKCLQKCFNPEERPSAYEMYKAL

>PBANKA\_142160

NKKDRTLDNNGLYKKNIIQLVVKIKHKELYSKINECNKITEVEIHKKLLKHCNII LNMILSAEDEKYICVFLEYSSI  
GDLYSFVGFNLIKKEVEKIVSQILFALYYLHIKGIHCDLKLLENLLLFNFDEESFLFESNLLSDIKMCHISQFK  
KLNAKKLVHSIKENIKNNPNIKVFYKIVKLCDFGLSVKCEFDFKFPFNGIRGSYGFIAPELFFQECFNNKIDMWA  
LGIISFLLGGYKPFYPCSRFEKVI FHERYWHNISPEAKNF IQSLEIDPFKRMNVI EAMDHPW

>PBANKA\_130520

YIILEKINTGVSQVHLALDKKQVIFIVFSKAIDKSTVQGEGLFQKLDKDEIIVSCRMNHPVVKTIINILETRDK  
IIQIMEYCDGGDLISYVRNVLYLEELSAQYFFRKILDGLKYMHSNKIAHRDLKPENIFLCKKVLNQEKTIRGK  
LPSCFEYELKIGDFGACCFNDASNKLHYDIVGTLSYAAPEVLGCDKNNGYDSEKADIWSLGIILYAMLFGLLPFD  
NEEKDIKEAHNEIVNKKIIFPKNRINRCSNNVKNLLIGMLNINPINRSLDQVINDPWV

>PBANKA\_080220

LIKDNTINFLYKCYDIKNNKNVVIKCVNKEKQLS IMSYNTYTNIIYKIIKKIDNENIIKIYDVLENQSHFFIIMEL  
CEGTDLVVDYVSNENISFEKIKDII FQLLSGISALHDNFI IHRDIKLDNLMFKDKNFELVIIDFDMSIYICAKDQ  
IYPSKSDCIYTSETKNTIYDNKFDENYMNMCNSDQLFSKKIGISGNFNTEFSEKSKNNICEENNAATSNFTFDY  
ANQGKHENPNKMHDSMNKNSCLYKNEPNMNTLDSNNTYTNKVTENDRKCNSLNSWHFSNSYDIKKNKTHN  
KKSTSLDYNYIRKIEENNFLSTNTRDIQKPFINNEKIIYNDLIIGTKEYMSPHCLKGMYSTKTDIYVGVTFIL  
IFKSFPYLFEEISIDKWEDEIINKNKEIIVIPFSFLFHNVNCTYFIKLMDLHLINNNIYFCNDSCLLDDNLKEIAK  
IRGIKFDKIKINQKNIYLVEILRKALSLDVCDQYSNVSQIMESSLF

>PBANKA\_082690

SLKYTVIEEGSFGVVYKGYKNMHVAVKVPVEKMKVQDPYGLTKRSINWKILSKCEHPNIIKLHGGIIHSYFDI  
LWVTKLINGSDLHTIKNNMNKEEKVLSVDISLKMCRQLAAVINFLHTPIKNKKNVI IHRDIKPENLII DSDWNIH  
LCDFGDESEETEDGNVSNVSGATWIYAPPELLTCHPLKQSSDYNFLDYAQLSYKWDIWSMGCVFQEMMNLSPFQ  
YIISFDESQIYEKLVDFTKKLPCCIHISKIDNSPFADI IKLCLNYDPNLRPTAKEIVDLL

>PBANKA\_031140

YYIIGLIYYGYSQVYKICINIKDKKTYAMKVV LKERENYEMVKNELNIDKFMKYMFLKKNPHKNIPIYDIFSD  
NNYNFIIMEFCKGSTLLDYFMSLVPGLSLHIYEIKKIMKNIFLALDFLHSRGLIHRDIKLENIMFTKKKMRNFNYK  
QCDNFDLNNTDFFLFEKGTCTNRGIVRNSVLKCESKIDLNNKQDNDLFLKKEEIDTIHKVDVDCWNSNGN  
IEYEIDSDTSSSDNIEWNNIWCDDRYQDESSYNCELEEFNFENSSNNISEIRKKPRSFDAYNNLFGNLDAYNCD  
DSSNIENNSLDNVMGRNLVNI LDNSYNFKLGKIYKNGSTIQIINKNNFQKKNII IKKNSSLTAIKSKRSEEKYL  
NSEKVKYRDTENRNNCRKNNDKKSFFKRRKYFPCNLVDNLCIDMMDMEDI SNMNPKNKKNQNIICGTASYMS  
PESFDGILSASNDI WACGVILYALMDGRFPYEIYNTMPNYLKKKILRYTKPNFDPFIWQESPDLLDLCLRLDPN  
PLTRIQNAKEALIHCCF

>PBANKA\_092700 PbtKL2

FSEENKIAKGGNGIVYKGI LKNCINVAIKVLKKNENNGFENELIIMSRYRHNNI LSLGAMNTNYFYLIYEYVS  
LGDRLTLFFNHYYFYNSQNKENIDFNNLSNMKLNYYNNIPKNKYITSLNNYTNLNYSKTSNLSNQTPFLFSFST  
RINILVQIINVLCYLHTSSPIVYHRDLKSANILIDEKFNALGDFGLSFIYINNNNIFNLTTGGTGPYADPYIST  
HEINEQTEIYSFGALILEMLVSKSPAIVHGKNYSYCYTRNEKCPIHCHRDKNDNDNVFDYLIINHINTNDYKSIY  
SILDYSVNFDFLVEKLTKLSFLCLNPNIKNRPSKLVNLIL

>PBANKA\_092640

FELYMHIGSGNFSDFVMVKLKNDP SKIYSLKIFSKKEKVMRMKNVNSVLTEKKVMIKLNTPGHLNVIKLIS TFKDK  
ENVYLLY EYADYELWEFLKTRSIGVSENITFNII LQMVHALAYIHDKDV IHRDVKCNFLINKDGTIKLIDFGTS  
KDLDHIPMENNKNECTIKDELSKFSLKKNNNINKNLKNESEENTSMLRDESSNNYVLDNDSNEELD KISNNDIS  
KNCRLEKPEQYNESFKYDDKNTIKCNDNLDNLDLDTIHLININKRNYRKKTFDNVYGTANFMPPEALINKCSGKV  
RDFWSLGCTIYQLVCTIIPFDGSTEFIYNKIKKREINYPPIIPLDLVDLIEKLI VINPECRLGFKNGCEDILQH  
PYF

>PBANKA\_094200

AVLLNVIDKQNNTEKIIKIINKKKTLTAFGETWENMIEYI LSINQHKNLMKLYDIYDDGKNFYLIMEKLRGKELF  
TFLVYKVKVENVCKYIILMQILQAVNYLHYHNI IHRDIKPENLMFRNQKRKDKNYEYNYELVLIDYDTCQFIKPO  
TRFNLFPTSIYNCKHVNL TNIKTIQNSKDINNAFLNKSKHIKLVGTYGYIAPEI IKGLNYSISSDIWSIGIILYI  
LITGVTPLP MCFMINYRNTKDILIKKEKGINFNLLSFNNYPLAKDLCQQFLQFDPKKRIKNTIIASYHPWL

>PBANKA\_130690

YKIIKVLSKTTTFSTTLKCLNLDYKNSIKNGEDSSNLLTKEKVSELESVCKKSKILSDNPNMSFTQNLKDLNKNYP  
FDISSIKKNSSEYIRNSTNNKNGIKKKYKYVCLKVMKKGKNYFDQGLFELTILNMLSEESINQTSMGNNKSN  
DITGSNII TNKNI IQLYDYFYLGHLIIVTEYME SLYNYFIKKGKGLTGLQLQILTKNLLQGLAYIHSKLIHC  
DLKPENIMINIKKKKKKKYPQHPTGNNNDETSNVQISHDSNEKNKYFSNDNDFDKNRENIFSSDQFSKIKI ID  
NSSIFEFDKLEMYVQTRPYRSPEVLLQHNYSKIDMWSLGCILFEFLT KILFDHKNIYRFIYSIASYIGSFPHY  
MIITCKIPYIFTKHGYMILKIIYYSNDDDPKEDPIDEIEDEPVI FNKNDFCLNKKCHQNDLLKIKNQPKFV  
HKQTNHKVYDICYSSNTPLENNFQIDDLLFINFLSLLQIDPCKRLNSKEALDHPWL

>PBANKA\_082960

YNGKIMTFYKYGGNSLMQWDKETRFQYKVKVYTVNEKKKKYIIFDKKMAENKKEYEYDKIWNPRINNDNNDN  
ISNKRTRKREKTYVYPEYMAEILRQLLACFYLYENQIYHSDIKPSNIVAKNIKKKNLNIIFCKKEKKWYIKKY

GKIKKNKILIKIIDFEYSQKCYGEEANVGGTTSLFKPLENFRKKKINIFSKMVWIIIGITIFILSTGTHPFSSINN  
DMHVLFLIQKNKFDIKNSFSKYSYFSHSFKDLLQKMLKVEYTORISFFDLFFHFPV

>PBANKA\_122880 PbTKL6

LEIMEFISEGSFGAIYKAMWNNQIIALKKFSSMTLEGMRSIAREINAYRSISHKYIVKYGVCSDFIGIILE  
YFSKKGKIFDTHLKGFEFNLTVELRLRMCTQLAEVMNYLHEDKKLVRDLKTSNILFDDEYNIKVCDGFKTMKLSDN  
GTVILEDNNGSIGYMAPECFIEGNTITEKSDIWGLSCCFIEIFFNQVPFQNIKEKEDIVVEILVNKKKPNIPKWF  
NPEFTEIIKRSFSTNPSKRPSCKEYLNLL

>PBANKA\_122500 PbFIKK

FICIPITLGFSSNRVQQMYKAIIPSKDGNKNDVKLFIKKIPIYIWKQFNLMTFEDGGEYVTDGENFVMEASL  
AFLSEYHPRIAPKLHKILYEVDNTNLDGSSNNIPPEMFSNLTVFNNVLEERLKNNINGNIVLVSEFFSEDILDF  
IDRRQKNFNMKISNNEKSYILYQCLKLLIRLHDAGLSHLDLTPENILISDNYEMRLCDLSKSTPIYTYNLRHIKD  
VNRLYLFESCEPTIAKGAYMPPECWKIYWKYDTMKIKNPLRDLKSITDQEKRKQFYFDVANADKFMGLGVFFFWIW  
TNGNLWKCSDPLQDEDFYFVKCDMNFDKFELTRKWPSELKSIKGLLHAETRKKLNLDKMDMHPWW

>PBANKA\_121710

MRILYSSKEKYTKYFHRGYLIKSDTNVNDTTLKLYPCVFLKSGEKRLVKKIDKNIFKGEILNALLKLRTYTYKNS  
SLPKYLLKTYNIYEDDKFSYVIFENCAGGFFFDILKDNVINENILAEWFYQILTALNFLEKTNIYHGNLNGYCI  
HFKDKTRKEIRVSLLSINNNDNIDEKGDLYGLYIRSPQEIKKLYHDKNNSWYVGMMLLYFILHGSYPFINNNVL  
VNYNIVQNNIPFTALKLDHKNYTNLMYDFLKSALFKDYDMRPSVEGLLNHPWI

>PBANKA\_094010

RVFRGRYMGKDVAIKVLVGNIKNFTKFHKVLYKLYILRHTNIALIMGVSIYFPVFIIEYIKNLCLFSYLHCVK  
YKHIYVSKLLKYYQKFINQNFQQNNTMSSDRKYISNDNEKINFDNRNILRNKLEIKCKNNAKNI TEKNL  
KDEQIYSSSTSISLSDTSSNMNNTKLNINFNKNRYINKIHSFRNKNNILCGNYYYLFRKKKNNISISHEHKN  
SDRTIFTNESQNLKNIKISQKKINKKLNFKAKIKINRPYAFPPLQEDFNFYLEKKKKKKILFSYLKTHSYFKSK  
KCDSRKNKLSHQIMKIIMDITLACSYLEKQKVRWINLKPTNILLDGSNAKISDFGIKEIEQCLDINIDYSYIV  
FPNNVIFKFNKHFKNKIKKIKIVNKGSEDMHVFSSKNHIYKYNTREINVSSNTHNSSVFFWTSPEILKKGQSPS  
LYSDVYAYGIIWELMTNSVFPNYRFSHLLASVGYAKESLPPFQNIIPFIKNIKSCINRNKYKRPTFDRILIEI

>PBANKA\_082680

YKNVHKYMKQISRRICFIEHFIMSRLRHPNIVEYIGNIITWKKNKNKEIRENFGLVFEYIKGRLYDILYNKK  
KGNKNEKENEKYYTHKNSKDNLYNGYKQWKLNNKFILKVLKICVTLHYLHEKNIYHGINSKNLFI TKNGNVKI  
CNFKNAHIQNYDYKTDIQNRSECSEKNNIYYNLANNFIPFPYITYINYTKQDTKYIDEITSTPFFLYTNIFN  
LKLMDHRNVYTAPEVLRGEEYTNKSDIYSFGIMYELIFETLPPFNKYNNNFNFFLSILISTCYFQNYIYFDIN  
QLINKINNNIMFHIFINITILIKSCLNPDPSNRPTSKYLYYYF

>PBANKA\_134590

YNKNRVGKTKHNENKKGYSYLYNIKVIECDETI VGGHEFIFSEDNSNNIKINKLIKEGKHINKSIYEYKEYCKD  
MDNYEENKEPYFEEKNNLNSKHRKGYKGNKISINSKNNNDYEVTYETLGVVPYSDIIVLNKKELDKQNKQ  
VAGFVTPFMLNGNIKKMIENINPNKYKFNDEMIFKSLCNIKVMNYLEEKNIHVGNIKPNNLFI SNNGFNILIG  
NFVPKIKLSNYYFYVINKTRTRMKYISPELLLYIKRKTNQLKKNINKNKIVS IENYHLIKNDIFCLGLSFYYIVS  
MNEDILNYIDDRYVQYKVDNIRDYIQKPELFFLLKNLLIYDHMYRPNWSDLSNLI

>PBANKA\_062150

KSSEFLLGVQKYSLCEKGLNEKCGKDKIKNGEYNAKNYVQNEYNMIAASKFEKIKKLNHPNICRYININRKN  
DYIFSEYYSLSLYDILNGENKNI AHFKCLRKIFGIKSQENNTKPSKMCVNMNEKLDGQTKIINHIVLKKIIEYI  
LKGVEYLHASKNIHFLNITPYNILITSGKIKLHNYCISYLFDNYEYNSKKKNEFFSKKFLDHIMSMENMIKE  
SKLSSVRNIQYPKYFLDLSENCEERILNSPLASLNDKIERKKKKKKYIFIENYFKYYNFSEDMLYFGPFFIFL  
NLFENQKIKISYDLYKHIDIFSVGIVIIQIINGLIDFQFIIDIFFSNFFCSKVSEVINSEQTEFTKINNQCSDS  
FEQNKKTDRYIRKYKINKIYESFKVVKNILQQRMSEKNMNKSEENYDKQKQLKFFVSSLLKDDVINRIENIFI
